# Supplementary material for: Zfp281 is essential for mouse epiblast maturation through transcriptional and epigenetic control of Nodal signaling
Source: eLife journal article supplement (doi:10.7554/elife.33333), 2017-11-23
Supplement: supp [file elife-33333-supp-v1.zip]

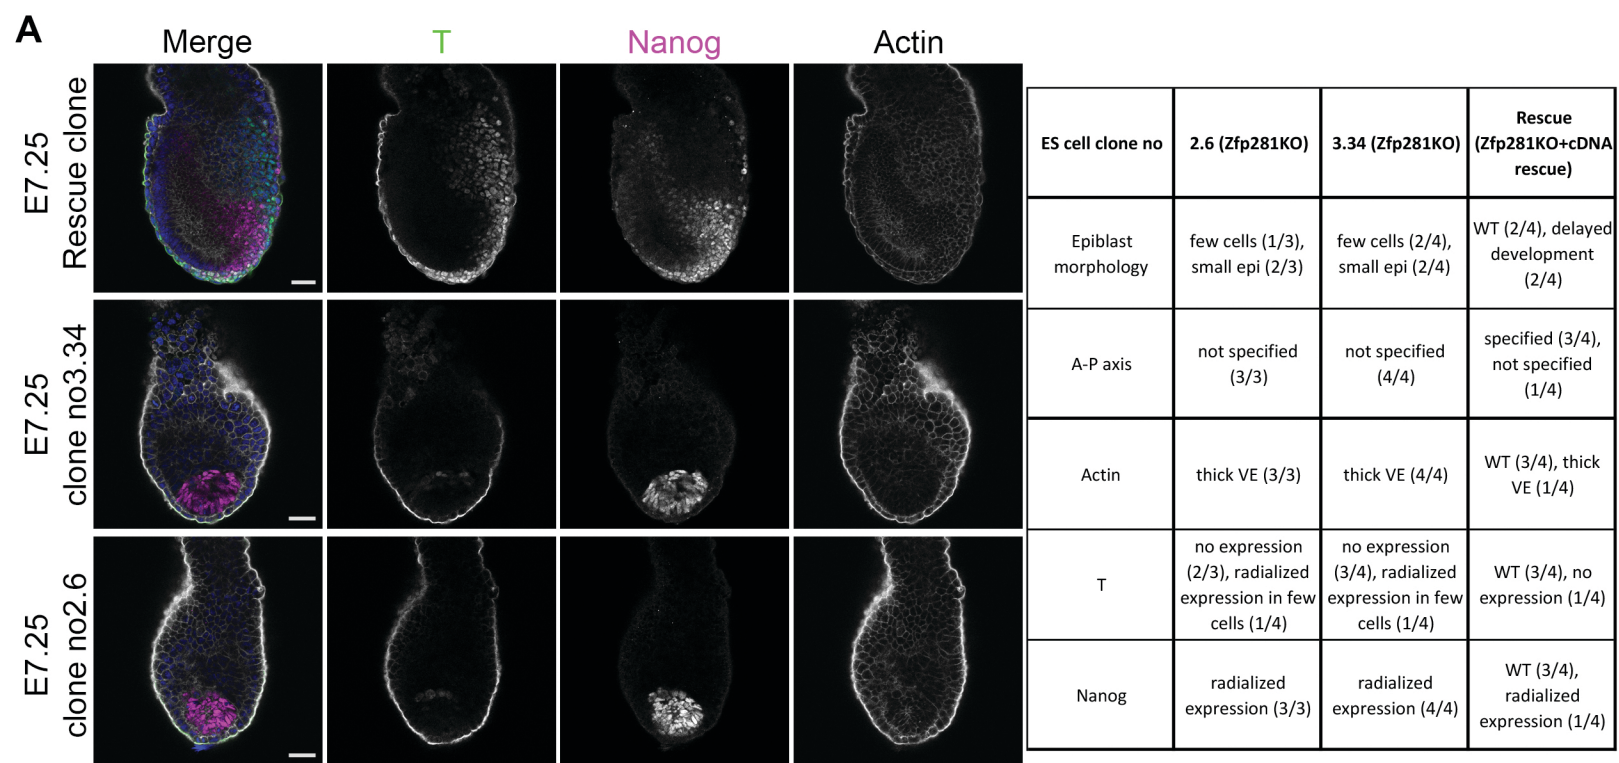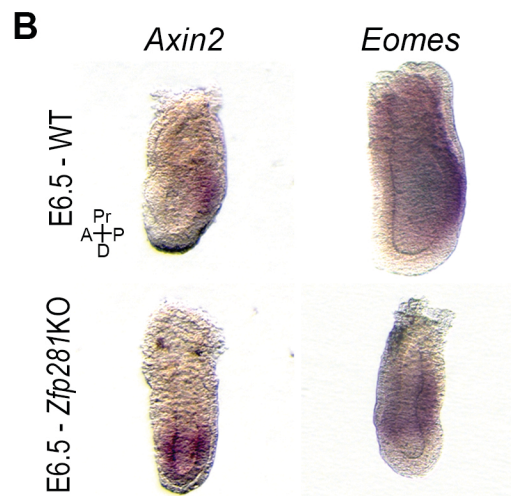

**C**

| In situ Probe | Stage | Zfp281KO with WT pattern | Zfp281KO with defective pattern | Zfp281KO with no expression | Total number analyzed (WT+KO) |
|---------------|-------|--------------------------|---------------------------------|-----------------------------|-------------------------------|
| <b>Otx2</b>   | E6.5  | 0/5                      | 4/5                             | 1/5                         | 15                            |
|               | E7.25 | 0/2                      | 2/2                             | 0/2                         | 6                             |
| <b>T</b>      | E7.25 | 0/3                      | 3/3                             | 0/3                         | 8                             |
| <b>Fgf8</b>   | E6.5  | 0/3                      | 3/3                             | 0/3                         | 9                             |
| <b>Axin2</b>  | E6.25 | 0/2                      | 2/2                             | 0/2                         | 4                             |
| <b>Eomes</b>  | E6.75 | 0/2                      | 2/2                             | 0/2                         | 6                             |
|               | E7.25 | 0/2                      | 0/2                             | 2/2                         | 6                             |

Figure 3-figure supplement 3
