# Supplementary material for: Zfp281 is essential for mouse epiblast maturation through transcriptional and epigenetic control of Nodal signaling
Source: eLife journal article supplement (doi:10.7554/elife.33333), 2017-11-23
Supplement: supp [file elife-33333-supp-v1.zip]

|                              | In situ Probe | Stage | <i>Zfp281</i> KO with WT pattern | <i>Zfp281</i> KO with defective pattern | <i>Zfp281</i> KO with no expression | Total number analyzed (WT+KO) |
|------------------------------|---------------|-------|----------------------------------|-----------------------------------------|-------------------------------------|-------------------------------|
| Anterior/AVE/<br>DVE markers | <i>Hesx1</i>  | E5.75 | 0/6                              | 5/6                                     | 1/6                                 | 20                            |
|                              | <i>Dkk1</i>   | E6.25 | 0/4                              | 1/4                                     | 3/4                                 | 17                            |
|                              | <i>Cerl</i>   | E6.25 | 0/4                              | 1/4                                     | 3/4                                 | 15                            |
|                              | <i>Hex</i>    | E6.25 | 0/2                              | 1/2                                     | 1/2                                 | 10                            |
| Nodal Signaling components   | <i>Lefty1</i> | E6.25 | 0/2                              | 0/2                                     | 2/2                                 | 9                             |
|                              | <i>Nodal</i>  | E5.5  | 0/2                              | 2/2                                     | 0/2                                 | 9                             |
|                              |               | E6.25 | 0/3                              | 3/3                                     | 0/3                                 | 12                            |
|                              | <i>Lefty2</i> | E6.75 | 0/3                              | 0/3                                     | 3/3                                 | 8                             |
|                              |               | E7.25 | 0/2                              | 2/2                                     | 0/2                                 | 12                            |

Figure 4-figure supplement 1
