# Supplementary material for: Zfp281 is essential for mouse epiblast maturation through transcriptional and epigenetic control of Nodal signaling
Source: eLife journal article supplement (doi:10.7554/elife.33333), 2017-11-23
Supplement: supp [file elife-33333-supp-v1.zip]

Archive with 22 entries (22 files):
- elife_poa_e33333_Figure_7_source_data_1.xlsx
- elife_poa_e33333_Figure_1_figure_supplement_2.pdf
- elife_poa_e33333_Figure_7_figure_supplement_3.pdf
- elife_poa_e33333_Figure_6_source_data_1.xlsx
- elife_poa_e33333_Figure_3_figure_supplement_3.pdf
- elife_poa_e33333_Figure_2_figure_supplement_2.pdf
- elife_poa_e33333_Figure_7_figure_supplement_2.pdf
- elife_poa_e33333_Figure_4_figure_supplement_2.pdf
- elife_poa_e33333_Figure_1_figure_supplement_1.pdf
- elife_poa_e33333_Figure_4_figure_supplement_1.pdf
- elife_poa_e33333_Figure_5_figure_supplement_2.pdf
- elife_poa_e33333_Figure_2_source_data_1.xlsx
- elife_poa_e33333_Figure_2_source_data_1.xlsx
- elife_poa_e33333_Figure_2_figure_supplement_1.pdf
- elife_poa_e33333_Figure_3_figure_supplement_2.pdf
- elife_poa_e33333_Transparent_Reporting_File.pdf
- elife_poa_e33333_Figure_5_figure_supplement_1.pdf
- elife_poa_e33333_Figure_7_figure_supplement_1.pdf
- elife_poa_e33333_Figure_3_figure_supplement_1.pdf
- elife_poa_e33333_Figure_6_figure_supplement_1.pdf
- elife_poa_e33333_Figure_1_figure_supplement_3.pdf
- elife_poa_e33333_Figure_5_source_data_1.xlsx
