# Supplementary material for: Zfp281 is essential for mouse epiblast maturation through transcriptional and epigenetic control of Nodal signaling
Source: eLife journal article supplement (doi:10.7554/elife.33333), 2017-11-23
Supplement: supp [file elife-33333-supp-v1.zip › elife_poa_e33333_Figure_1_figure_supplement_2.pdf]

**A** Genotypes and estimated/observed percentages of live born animals from  $Zfp281^{+/-} \times Zfp281^{+/-}$  intercrosses

| genotype       | offspring<br>(3 weeks) | estimated<br>% | observed<br>% |
|----------------|------------------------|----------------|---------------|
| $Zfp281^{+/+}$ | 67                     | 25             | 38.7          |
| $Zfp281^{+/-}$ | 106                    | 50             | 61.3          |
| $Zfp281^{-/-}$ | 0                      | 25             | 0             |

**B** Genotypes of embryos from  $Zfp281^{+/-} \times Zfp281^{+/-}$  intercrosses at different developmental stages

|          | $Zfp281^{+/+}$ | $Zfp281^{+/-}$ | $Zfp281^{-/-}$ | Empty<br>decidua |
|----------|----------------|----------------|----------------|------------------|
| E7.5-8.0 | 18             | 37             | 26 *           |                  |
| E8.5     | 3              | 7              | 0              | 6                |
| E10.5    | 3              | 2              | 0              | 2                |
| E11.5    | 4              | 4              | 0              | 10               |
| E12.5    | 6              | 2              | 0              | 1                |
| E13      | 1              | 6              | 0              | 3                |

\* No. of  $Zfp281^{-/-}$  embryos followed a Mendelian ratio, but all embryos have gross morphological defects.
