# Supplementary material for: Zfp281 is essential for mouse epiblast maturation through transcriptional and epigenetic control of Nodal signaling
Source: eLife journal article supplement (doi:10.7554/elife.33333), 2017-11-23
Supplement: supp [file elife-33333-supp-v1.zip › elife_poa_e33333_Figure_2_source_data_1.xlsx]

## Sheet: Sheet1
gene_id	gene unique	locus	WT_rep1	WT_rep2	WT_rep3	WT_rep4	KO_rep1	KO_rep2	KO_rep3	KO_rep4	WT_ave	KO_ave	FC (KO/WT)	p-value
XLOC_000413	Zfp281	chr1:138521477-138526968	13.321	16.4716	16.6813	19.5301	0.1	0.1	0.1	0.11897	16.501	0.104743	-7.29956	1.32174e-05
XLOC_014546	Cer1	chr4:82527654-82531055	22.039	31.3261	36.0555	18.848	0.599327	0.21727	0.1	0.387003	27.0672	0.3259	-6.37597	0.000542215
XLOC_000584	Lefty2	chr1:182823249-182829233	13.1405	7.46795	1.82663	2.15737	0.1	0.1	0.1	0.1	6.14811	0.1	-5.94207	0.0437265
XLOC_000586	Lefty1	chr1:182865169-182868532	5.25911	7.11441	4.20923	3.56294	0.224849	0.350017	0.223513	0.111133	5.03642	0.227378	-4.46923	0.000821051
XLOC_001865	Slc35d3	chr10:19567722-19571265	6.37234	3.99022	6.7602	8.80299	0.458978	0.463	0.289871	0.328532	6.48144	0.385095	-4.07303	0.000831466
XLOC_009875	Rasgrp2	chr19:6400582-6415216	8.18405	7.19673	6.22187	5.73643	1.61352	0.428236	0.199169	0.553582	6.83477	0.698627	-3.2903	6.53638e-05
XLOC_007855	Klhl6	chr16:19946585-19983122	1.5345	1.87649	0.533227	0.440039	0.136293	0.113627	0.1	0.1	1.09606	0.11248	-3.28459	0.0338543
XLOC_017092	Zfp467	chr6:48377690-48395824	2.28164	2.93696	2.19956	3.32315	0.512775	0.292299	0.166286	0.27524	2.68533	0.31165	-3.1071	0.000143633
XLOC_007146	Foxh1	chr15:76498736-76500303	27.9424	30.4893	32.1534	27.5772	5.05326	2.23721	2.34691	4.55413	29.5406	3.54788	-3.05767	1.0603e-06
XLOC_006849	Mapk8ip2	chr15:89284341-89292878	3.74961	2.06031	3.54407	3.07457	0.457037	0.27977	0.652412	0.112493	3.10714	0.375428	-3.04898	0.000445675
XLOC_001519	Dnmt3l	chr10:77492766-77526360	8.44957	4.32873	6.17233	9.13256	1.61872	0.520186	0.522566	0.773667	7.0208	0.858785	-3.03127	0.00157161
XLOC_021988	Tdgf1	chr9:110842111-110848662	45.1595	83.079	32.8321	39.7453	9.43374	5.72866	3.49137	8.89101	50.204	6.8862	-2.86602	0.00873137
XLOC_015203	Pcdh7	chr5:58109259-58523479	11.7861	18.5382	5.07446	4.99245	3.61521	1.02837	0.539904	0.515861	10.0978	1.42484	-2.82517	0.0398279
XLOC_018847	Dll3	chr7:29078573-29086804	8.59187	5.49678	3.1166	3.15928	1.42615	0.577696	0.202669	0.743316	5.09113	0.737458	-2.78735	0.016327
XLOC_008797	Mmp25	chr17:23766424-23782236	8.62033	5.21715	10.0913	9.13117	2.94353	0.885287	0.385219	0.839574	8.26499	1.2634	-2.7097	0.00113963
XLOC_003886	Gm11627	chr11:102437712-102440433	2.20099	0.577122	4.8493	3.59176	0.628116	0.602507	0.1	0.38608	2.80479	0.429176	-2.70825	0.0427126
XLOC_018898	Etv2	chr7:31418634-31420871	3.10044	3.01725	1.27557	0.602679	0.32365	0.17764	0.331306	0.499503	1.99898	0.333025	-2.58557	0.0384891
XLOC_003669	Lhx1	chr11:84332880-84339036	46.4736	41.8473	21.6526	16.075	7.57566	4.44081	5.45217	3.56779	31.5121	5.25911	-2.58302	0.0128245
XLOC_007799	Pla2g10	chr16:13715154-13739564	1.88642	0.702733	2.25446	1.69727	0.1	0.1	0.315383	0.626285	1.63522	0.285417	-2.51834	0.00885867
XLOC_021523	Epor	chr9:21763342-21768020	2.14692	0.918822	1.53807	0.832911	0.193842	0.260633	0.183039	0.391215	1.35918	0.257182	-2.40187	0.0119504
XLOC_018866	Spred3	chr7:29943847-29953666	5.58692	4.20724	5.76319	5.63554	1.51037	0.922833	0.761304	0.815713	5.29822	1.00255	-2.40183	4.09159e-05
XLOC_017157	Snca	chr6:60681566-60779849	1.12639	0.750709	1.67264	0.888031	0.156713	0.336466	0.24675	0.117685	1.10944	0.214403	-2.37143	0.00518326
XLOC_019658	Ccnd1	chr7:152115835-152125830	38.0467	22.2727	27.1354	31.9575	7.34326	5.8124	4.79062	5.14556	29.8531	5.77296	-2.3705	0.000409335
XLOC_021526	Elavl3	chr9:21819448-21856467	6.28246	3.95494	3.85741	4.57362	1.30449	0.782864	0.55169	0.99696	4.66711	0.909001	-2.36017	0.000664205
XLOC_018548	Fgf4	chr7:152047290-152051148	1.46875	2.50494	2.67911	2.06124	0.493936	0.506684	0.26571	0.466597	2.17851	0.433232	-2.33013	0.000728462
XLOC_006361	Jph4	chr14:55725662-55735772	10.5459	5.50722	6.82858	7.28343	2.63861	1.22163	1.45295	0.776032	7.54128	1.52231	-2.30855	0.00187852
XLOC_000973	Cxcr4	chr1:130484775-130488876	6.19598	7.89236	4.75394	3.39995	1.99832	1.30335	0.222032	1.01552	5.56056	1.13481	-2.29278	0.00515824
XLOC_009061	Glyatl3	chr17:41041689-41051299	1.61571	2.2718	0.823126	1.79962	1.03958	0.1	0.1	0.1	1.62756	0.334895	-2.28093	0.0148371
XLOC_004785	Gsc	chr12:105709418-105711446	30.9708	19.977	12.3589	8.53514	9.29609	2.14511	1.60878	1.98418	17.9605	3.75854	-2.25658	0.0360732
XLOC_019906	Crlf1	chr8:73017054-73027980	5.72374	4.93843	4.7571	3.20568	1.85899	0.306399	1.41128	0.366524	4.65624	0.985798	-2.2398	0.00135814
XLOC_003065	Mrc2	chr11:105153959-105212459	6.16064	4.31544	3.99453	4.65496	1.46871	1.12755	0.612889	0.852801	4.78139	1.01549	-2.23526	0.000327671
XLOC_022615	Eras	chrX:7496947-7505733	11.99	14.0217	14.1726	10.3203	3.80081	2.44901	1.5779	2.94827	12.6261	2.694	-2.22859	7.00586e-05
XLOC_006108	Slitrk5	chr14:112074336-112082357	1.58809	0.984106	0.918126	1.32017	0.266132	0.198051	0.254432	0.31474	1.20262	0.258339	-2.21885	0.000970999
XLOC_016991	Tmem229a	chr6:24901140-24906125	2.4087	2.49372	1.22598	1.84642	0.842829	0.360974	0.170363	0.354905	1.99371	0.432268	-2.20545	0.0030691
XLOC_016105	Dtx1	chr5:121130272-121161678	2.6306	1.37814	2.59537	2.71229	0.731281	0.371988	0.551199	0.435972	2.3291	0.52261	-2.15597	0.00149378
XLOC_008464	Psors1c2	chr17:35670145-35671592	7.25135	4.24715	5.45666	3.52168	1.58508	0.967533	0.502483	1.69845	5.11921	1.18839	-2.10692	0.00384287
XLOC_023009	Irs4	chrX:138145540-138159760	12.9186	17.6045	19.428	16.301	5.0389	4.71532	1.63587	4.52455	16.563	3.97866	-2.05761	0.000211215
XLOC_007465	2900011O08Rik	chr16:13981794-14101587	2.56533	3.05668	2.63257	3.65043	0.575907	1.04918	0.1	1.21898	2.97625	0.736017	-2.01569	0.000735272
XLOC_011348	Xkr7	chr2:152857587-152881511	1.72369	0.832857	1.06651	1.19522	0.504463	0.326592	0.26407	0.114967	1.20457	0.302523	-1.9934	0.00457843
XLOC_015099	Gareml	chr5:30430123-30481520	1.53975	0.754857	1.10122	1.05262	0.42766	0.211036	0.377077	0.133604	1.11211	0.287344	-1.95245	0.00336649
XLOC_008650	Lbh	chr17:73267644-73291286	11.8194	10.0108	7.30463	7.29671	4.087	2.16153	1.33667	2.03039	9.10788	2.4039	-1.92174	0.00175101
XLOC_012972	Abca4	chr3:121747377-121882979	1.20391	1.25702	1.65932	1.13995	0.545901	0.322521	0.206657	0.340544	1.31505	0.353906	-1.89368	0.00041527
XLOC_010884	Klhl23	chr2:69660426-69674708	4.18956	3.98406	4.4998	7.08647	1.77722	1.00814	0.876873	1.67167	4.93997	1.33348	-1.88931	0.00314305
XLOC_020618	Exoc3l	chr8:107813823-107819998	2.90769	2.85743	1.78949	1.51377	1.10884	0.293514	0.334821	0.716103	2.26709	0.61332	-1.88613	0.00664555
XLOC_005512	Gas1	chr13:60275765-60278896	11.1395	11.8772	8.01653	7.21394	5.33202	2.12533	1.95799	1.04095	9.56179	2.61407	-1.87098	0.00334458
XLOC_010839	Lypd6b	chr2:49643205-49804366	2.02947	2.01764	1.58386	2.2292	0.232959	0.621979	0.1	1.19816	1.96504	0.538274	-1.86815	0.00228455
XLOC_007956	Gap43	chr16:42248673-42340764	2.08682	2.95651	2.73989	2.38191	0.59087	1.59335	0.21491	0.387006	2.54128	0.696534	-1.86729	0.00228192
XLOC_010414	Dkk1	chr19:30620373-30623986	15.2057	19.0081	15.3787	11.6241	2.39857	6.39557	3.03089	5.2204	15.3041	4.26136	-1.84454	0.000792947
XLOC_011192	Sema6d	chr2:124436031-124493506	2.76232	3.15799	1.87231	1.34805	0.760696	0.656877	0.474971	0.698558	2.28517	0.647776	-1.81873	0.00771567
XLOC_001653	Usp44	chr10:93294299-93320832	15.1751	8.7932	13.6563	19.2232	4.19645	4.36899	3.93571	3.77763	14.2119	4.06969	-1.80411	0.00333211
XLOC_021239	Pcolce2	chr9:95538046-95595970	3.11498	2.69204	2.93194	3.47972	0.515528	0.772141	1.10853	1.12189	3.05467	0.879522	-1.79622	6.34062e-05
XLOC_010637	Gm13315	chr2:14525932-14909535	1.61669	1.3878	0.95348	1.40164	0.438674	0.397858	0.511748	0.203498	1.3399	0.387944	-1.78821	0.000820337
XLOC_014226	Gm13051	chr4:146064712-146094024	4.38604	7.48377	6.54693	3.2392	2.52426	1.42197	0.965639	1.42565	5.41399	1.58438	-1.77277	0.00977445
XLOC_000207	Speg	chr1:75371871-75428881	6.15131	8.454	6.78969	5.54375	3.26431	1.73356	1.98336	0.912017	6.73469	1.97331	-1.77099	0.000968366
XLOC_011210	Adra2b	chr2:127189021-127192957	1.87104	0.998181	0.828231	1.11079	0.249962	0.22957	0.675531	0.257995	1.20206	0.353264	-1.76669	0.0156574
XLOC_001075	Tor3a	chr1:158583747-158604470	4.37528	4.44546	5.39865	5.60211	1.59823	1.77559	1.11437	1.42168	4.95538	1.47747	-1.74587	5.77146e-05
XLOC_016629	B230319C09Rik	chr6:83391748-83398316	1.51835	0.782264	0.688836	1.2748	0.189524	0.427058	0.549968	0.126472	1.06606	0.323255	-1.72155	0.0154069
XLOC_009280	Fzd8	chr18:9212853-9216199	9.21798	10.7095	7.83435	8.10611	2.30515	2.88279	3.99426	1.80209	8.96699	2.74607	-1.70725	0.000247228
XLOC_020745	Pcnxl2	chr8:128275407-128422193	1.712	0.823762	1.28668	1.51839	0.561978	0.552824	0.287978	0.246582	1.33521	0.412341	-1.69516	0.00449928
XLOC_003370	Phf15	chr11:51626957-51670983	6.87479	4.59793	5.83586	7.54784	2.74151	1.95401	1.36645	1.64595	6.2141	1.92698	-1.68921	0.000924271
XLOC_004158	Etv1	chr12:39506844-39594802	3.77037	3.20152	3.95806	6.10762	2.4182	1.14446	0.363086	1.38053	4.25939	1.32657	-1.68295	0.00861674
XLOC_008492	Zfp57	chr17:37138107-37147674	8.1344	13.8142	8.74516	7.08538	4.05435	3.11786	2.81659	1.79703	9.44478	2.94646	-1.68054	0.00602858
XLOC_015224	Uchl1	chr5:67067359-67078473	21.9529	13.8259	17.2456	17.9922	6.90656	6.62696	4.8502	3.97512	17.7541	5.58971	-1.66731	0.000528683
XLOC_015658	Rasl11a	chr5:147656646-147659302	5.44248	3.23878	3.45135	3.41356	1.94523	0.951013	1.36575	0.643548	3.88654	1.22639	-1.66408	0.00413186
XLOC_020851	Cnn1	chr9:21903696-21913665	1.1117	1.87489	2.87523	1.64263	0.72255	0.496246	0.307267	0.842288	1.87611	0.592088	-1.66386	0.0162269
XLOC_013657	1700123M08Rik	chr4:11893720-11921442	0.929446	0.575297	1.22682	1.38314	0.186656	0.369685	0.143779	0.602062	1.02868	0.325545	-1.65986	0.0143681
XLOC_012456	Ptgis	chr2:167028695-167066037	8.03643	6.35671	5.81384	6.28464	2.61723	1.91278	2.27468	1.59019	6.6229	2.09872	-1.65795	0.000148902
XLOC_009773	Rnf165	chr18:77694848-77803875	0.695792	0.700763	1.93221	1.29302	0.302186	0.349665	0.484704	0.331015	1.15545	0.366893	-1.65502	0.037864
XLOC_022818	Gabra3	chrX:69678014-69901585	1.19738	1.46906	1.47849	2.28993	0.320426	0.426243	0.540874	0.781495	1.60872	0.517259	-1.63695	0.00531165
XLOC_000798	Fzd5	chr1:64777131-64784324	23.1817	27.1755	27.7966	21.1714	8.69653	8.45182	8.85861	5.97147	24.8313	7.99461	-1.63506	6.77678e-05
XLOC_006591	Capsl	chr15:9365782-9395790	2.14978	3.65314	1.63636	1.45571	0.336893	0.649354	0.970477	0.927521	2.22375	0.721061	-1.6248	0.0276419
XLOC_009675	Jakmip2	chr18:43691061-43847427	2.32238	3.07039	1.90433	2.61428	0.897379	1.11134	0.663833	0.578298	2.47785	0.812712	-1.60827	0.000889749
XLOC_009491	St8sia3	chr18:64317377-64436834	1.55064	0.916662	0.824143	1.86948	0.302705	0.560334	0.29954	0.53406	1.29023	0.42416	-1.60495	0.016184
XLOC_007524	Chrd	chr16:20724526-20742457	3.19103	2.81481	1.34253	1.14988	0.833065	0.457028	1.04087	0.463725	2.12456	0.698672	-1.60448	0.0370598
XLOC_005600	Rhobtb3	chr13:76006984-76081272	8.38562	10.7646	13.6326	12.2687	4.59765	4.35746	3.52301	2.58843	11.2629	3.76664	-1.58023	0.000823695
XLOC_022989	Tceal5	chrX:132735489-132738390	1.91379	2.46898	1.31877	1.59119	0.593667	0.695492	0.973761	0.186649	1.82318	0.612392	-1.57393	0.00644285
XLOC_009170	Tubb4a	chr17:57219488-57227205	6.82655	5.55806	6.66093	7.43209	2.39546	2.69132	1.02318	2.92577	6.61941	2.25893	-1.55106	0.000281338
XLOC_014766	Hpca	chr4:128782773-128798984	2.1997	0.827877	2.09033	1.2184	0.670462	0.61578	0.1	0.781544	1.58408	0.541947	-1.54742	0.0295577
XLOC_002520	Col23a1	chr11:51103421-51397427	4.446	5.23038	4.69372	2.19104	1.95431	1.42479	1.15364	1.17029	4.14029	1.42576	-1.538	0.0079616
XLOC_022932	Slc16a2	chrX:100892752-101017327	3.79762	2.58586	2.79067	4.0811	2.21493	1.07223	0.488492	0.790314	3.31381	1.14149	-1.53757	0.00620389
XLOC_015166	Jakmip1	chr5:37442095-37516537	4.10934	2.44803	2.75191	3.72527	1.9016	0.671398	1.18339	0.735827	3.25864	1.12305	-1.53684	0.00453818
XLOC_016228	Pilrb1	chr5:138293374-138299277	1.10135	1.64309	1.54154	0.954889	0.701498	0.1	0.654668	0.3539	1.31022	0.452516	-1.53376	0.00769691
XLOC_010468	Sfrp5	chr19:42272460-42276742	8.91083	11.4366	13.8999	8.83457	2.51384	3.74497	4.86332	3.75991	10.7705	3.72051	-1.53351	0.00161324
XLOC_000455	Angptl1	chr1:158734296-158869757	0.836023	1.43236	0.93528	1.45329	0.686889	0.294374	0.238303	0.391615	1.16424	0.402795	-1.53127	0.00713345
XLOC_013672	Ttpa	chr4:19935574-19957932	0.903726	1.14477	1.14793	1.34659	0.233316	0.527344	0.397116	0.415781	1.13575	0.393389	-1.52962	0.000491482
XLOC_007098	Arc	chr15:74499510-74503000	1.54602	0.965903	1.08789	0.894602	0.887781	0.313406	0.174145	0.181768	1.1236	0.389275	-1.52927	0.0167742
XLOC_022743	Gpc4	chrX:49406194-49518100	41.9817	43.1002	50.4904	39.7634	27.7671	13.2349	8.49298	11.3522	43.8339	15.2118	-1.52686	0.00109284
XLOC_001471	Fam13c	chr10:69903415-70062039	0.89017	0.720877	0.98529	1.56378	0.35305	0.327854	0.134805	0.646939	1.04003	0.365662	-1.50804	0.0187901
XLOC_000914	Kif1a	chr1:94912032-94998442	4.39501	3.70855	4.88885	5.37086	1.83851	1.65969	1.30287	1.67996	4.59082	1.62026	-1.50253	0.00020792
XLOC_012335	Sox12	chr2:152219347-152223782	17.5153	13.6161	16.8217	17.0505	7.83566	5.34393	5.53658	4.27226	16.2509	5.74711	-1.49961	0.000103556
XLOC_010134	Ina	chr19:46961320-47098836	14.1204	6.96779	8.16973	9.97684	7.15033	2.58713	1.89389	2.41079	9.80869	3.51054	-1.48237	0.0192626
XLOC_017361	Wnt5b	chr6:119382548-119494365	1.68925	1.07788	1.96896	2.02054	1.3129	0.260879	0.439882	0.408709	1.68916	0.605592	-1.47988	0.0152069
XLOC_000459	Astn1	chr1:160292434-160621917	0.845148	0.661316	1.25226	1.43361	0.557638	0.185655	0.207531	0.561979	1.04808	0.378201	-1.47053	0.0177078
XLOC_005076	Prr7	chr13:55565627-55574516	4.03809	1.95555	1.70958	2.38631	1.61773	0.934921	0.677738	0.430188	2.52238	0.915144	-1.46272	0.0330614
XLOC_017243	2310040G24Rik	chr6:86433369-86438221	2.17865	2.95642	1.50014	1.84181	0.856423	0.76343	0.447542	1.00969	2.11926	0.769271	-1.46199	0.0067295
XLOC_008359	Fgd2	chr17:29497858-29516480	1.6238	1.4014	1.11245	1.86666	0.930859	0.421974	0.502514	0.326085	1.50108	0.545358	-1.46072	0.00378619
XLOC_009688	Ticam2	chr18:46717884-46734187	1.58331	1.12389	1.32115	1.54407	0.500209	0.282005	0.583865	0.661595	1.39311	0.506919	-1.45848	0.000587147
XLOC_007395	Rarg	chr15:102065370-102087914	10.3941	8.10439	11.4851	12.181	5.86274	3.00396	3.52634	2.96609	10.5411	3.83978	-1.45694	0.0010026
XLOC_022486	Zcchc18	chrX:133515654-133572841	1.83424	2.45129	2.69245	2.03587	0.643597	0.903443	0.794715	0.950555	2.25346	0.823078	-1.45304	0.000445848
XLOC_014529	Dbc1	chr4:68422405-68615431	1.2393	1.15923	1.11443	0.800384	0.462945	0.304897	0.214009	0.610255	1.07834	0.398026	-1.43787	0.00195135
XLOC_018726	Bcam	chr7:20341486-20355881	10.2683	6.48912	11.3059	8.84385	2.98035	3.66504	4.64519	2.33428	9.22679	3.40621	-1.43766	0.00234822
XLOC_023022	Lrch2	chrX:143906236-143988624	4.39715	5.55784	4.81663	7.44779	2.15486	1.77645	2.4003	1.90718	5.55485	2.0597	-1.43132	0.00228206
XLOC_007248	Sult4a1	chr15:83906526-83936184	6.22453	4.76826	4.75768	5.8741	2.66173	2.04448	1.66787	1.65817	5.40614	2.00806	-1.4288	0.000265209
XLOC_018403	Fam57b	chr7:133960398-133973733	7.65678	3.05802	4.80501	4.42854	3.19707	1.60008	1.12635	1.53277	4.98709	1.86407	-1.41974	0.0265119
XLOC_013888	Foxd3	chr4:99322989-99325362	27.5799	14.7649	19.4903	19.196	13.424	6.02386	7.38747	3.4639	20.2578	7.57481	-1.41919	0.00978517
XLOC_004797	Bcl11b	chr12:109148612-109241624	2.46692	1.37831	2.68938	3.20876	1.35629	0.776506	0.682496	0.830589	2.43584	0.91147	-1.41815	0.010298
XLOC_010044	Ifit2	chr19:34625183-34651024	1.88511	1.5941	1.99928	2.23975	0.742936	0.704683	0.844662	0.636331	1.92956	0.732153	-1.39805	0.000145404
XLOC_014128	Rhd	chr4:134420450-134452087	1.9675	0.61062	1.27352	1.44256	0.703225	0.546076	0.206735	0.603159	1.32355	0.514799	-1.36233	0.0357023
XLOC_001209	Mixl1	chr1:182623178-182627165	47.5127	56.131	31.6319	27.6605	30.7236	8.60458	4.18259	20.2366	40.734	15.9368	-1.35387	0.0326803
XLOC_016897	Mgst1	chr6:138089057-138105273	2.87435	2.82679	2.01914	2.1719	0.796391	1.19554	0.472495	1.42839	2.47304	0.973204	-1.34547	0.00269426
XLOC_012696	Serpini1	chr3:75361454-75446445	0.805867	1.45038	1.19856	1.58694	0.481887	0.570099	0.477817	0.454269	1.26044	0.496018	-1.34546	0.00452998
XLOC_011311	Syndig1	chr2:149656518-149830128	1.31714	2.25159	1.34464	1.34524	0.367823	0.427668	0.359099	1.3186	1.56465	0.618297	-1.33947	0.0276785
XLOC_010057	Hhex	chr19:37509330-37515221	5.91021	7.63886	5.58213	4.95236	2.7151	2.84809	2.12381	1.84107	6.02089	2.38202	-1.33779	0.00110653
XLOC_014770	Zbtb8a	chr4:129030875-129055272	10.7358	8.12933	12.5487	12.9752	6.17633	4.35432	3.64017	3.42991	11.0973	4.40018	-1.33457	0.00185126
XLOC_015830	Ldb2	chr5:44863371-45190946	2.34031	1.95768	2.26863	3.31766	0.482869	0.844033	0.892804	1.70061	2.47107	0.980079	-1.33417	0.00879012
XLOC_010297	Gng3	chr19:8911418-8923173	7.93566	6.57841	7.76586	9.18142	3.01956	3.06381	3.36903	3.08187	7.86534	3.13357	-1.3277	0.000120401
XLOC_009599	Klhl14	chr18:21708877-21814608	1.26976	0.653898	1.4226	1.29753	0.330367	0.651129	0.246248	0.622702	1.16095	0.462611	-1.32743	0.0130445
XLOC_003995	Foxj1	chr11:116192017-116196668	5.74463	3.78828	2.77572	1.84511	1.65323	1.55928	1.07208	1.39426	3.53843	1.41971	-1.31751	0.0461219
XLOC_015741	Wdr86	chr5:24218086-24236498	6.09136	3.53035	4.14199	3.55606	2.72138	1.13348	2.10221	1.00698	4.32994	1.74101	-1.31442	0.0120458
XLOC_015045	Speer8-ps1	chr5:14945293-14978541	2.5683	2.75919	2.80965	1.82475	0.336327	1.06291	0.481518	2.13342	2.49047	1.00354	-1.31132	0.0190394
XLOC_012756	Thbs3	chr3:89019108-89030759	6.19841	3.53465	4.33884	5.05025	2.44281	1.9209	2.31877	1.06897	4.78054	1.93786	-1.30271	0.0045187
XLOC_007272	Mapk11	chr15:88972913-88980036	1.41223	1.09297	0.788273	1.44555	1.12591	0.268656	0.110509	0.430917	1.18476	0.483998	-1.29152	0.0418384
XLOC_013396	Car14	chr3:95697843-95708562	37.3353	33.2644	36.0693	36.5919	20.6924	9.51166	16.0372	12.2904	35.8152	14.6329	-1.29136	0.00017622
XLOC_022357	Pcyt1b	chrX:90900201-90995287	1.85399	1.5358	2.39355	2.18169	0.941901	0.878845	0.45937	1.01346	1.99126	0.823394	-1.27402	0.00205585
XLOC_001947	Lin28b	chr10:45096424-45190007	17.2332	12.8499	16.4733	26.2548	8.07269	7.88315	5.94388	8.26934	18.2028	7.54226	-1.27109	0.010375
XLOC_010758	Ncs1	chr2:31101442-31150991	9.90427	6.39497	7.04828	6.9741	4.79778	3.08179	2.85999	1.9164	7.58041	3.16399	-1.26053	0.00429578
XLOC_019170	Hdgfrp3	chr7:89003907-89079345	4.44277	4.4184	3.37338	3.03727	2.12227	1.72173	1.14456	1.42106	3.81796	1.6024	-1.25256	0.00180355
XLOC_021554	Kcnj5	chr9:32122367-32151822	1.21886	1.19499	1.15885	0.927927	0.404626	0.572326	0.520712	0.391909	1.12516	0.472393	-1.25207	0.000184195
XLOC_014114	Fam46b	chr4:133036047-133043855	1.72163	2.26031	2.31388	2.0875	0.892725	0.806119	1.02854	0.793648	2.09583	0.880258	-1.25152	0.000152554
XLOC_022043	Tmem158	chr9:123168174-123169907	2.93716	2.51768	4.25063	2.80871	1.60945	1.59254	1.45299	0.619941	3.12854	1.31873	-1.24634	0.00699014
XLOC_012518	Tcfl5	chr2:180332926-180377396	24.9406	19.0303	28.1855	20.0668	14.8954	7.93369	10.1848	6.08866	23.0558	9.77564	-1.23787	0.00354671
XLOC_014351	Fut9	chr4:25536479-25727150	1.3539	1.99521	2.17638	2.06436	0.723486	0.828684	0.389629	1.28114	1.89746	0.805735	-1.23569	0.00578938
XLOC_002182	Socs2	chr10:94874123-94879491	26.4826	35.0385	27.3739	30.3668	20.5186	12.4635	7.42994	10.2596	29.8155	12.6679	-1.23488	0.00238479
XLOC_006801	Sept3	chr15:82105364-82124872	2.04399	2.02871	2.10048	3.13374	1.36285	1.12898	0.589648	0.900441	2.32673	0.99548	-1.22484	0.00559969
XLOC_023026	Tro	chrX:147079845-147091979	6.24762	6.17369	7.62509	5.8481	3.51021	2.86041	2.08755	2.65612	6.47362	2.77857	-1.22023	0.000285107
XLOC_004344	Chga	chr12:103793178-103803237	4.0495	3.22468	2.75738	2.614	1.5362	1.26027	1.74514	0.892394	3.16139	1.3585	-1.21854	0.0028745
XLOC_008462	Pou5f1	chr17:35642976-35647722	313.154	272.914	293.033	268.317	189.964	101.323	97.8596	104.444	286.855	123.398	-1.217	0.000547797
XLOC_008602	Fsd1	chr17:56125933-56136304	6.52269	5.22453	7.62413	6.97716	4.86975	2.21747	1.93897	2.37633	6.58713	2.85063	-1.20837	0.00452882
XLOC_017712	Rtn2	chr7:19867972-19881513	4.59149	3.57319	4.82656	4.28408	2.91968	1.80934	1.87596	0.874638	4.31883	1.8699	-1.20768	0.00268466
XLOC_022956	Hdx	chrX:108688812-108810688	2.72715	4.05973	3.026	4.97435	1.51376	1.77542	0.99922	2.11556	3.69681	1.60099	-1.20732	0.00990969
XLOC_008321	Rgs11	chr17:26339906-26348269	0.766417	1.6277	1.1921	1.07025	0.448843	0.495335	0.1	0.977169	1.16412	0.505337	-1.20392	0.0408913
XLOC_022089	Dgkk	chrX:6356431-6525489	10.664	15.8803	16.5469	12.7514	7.33524	6.17676	4.02628	6.92501	13.9607	6.11582	-1.19075	0.00238583
XLOC_009119	Apobec2	chr17:48558555-48572053	1.9529	3.36879	2.43219	1.13025	1.22677	0.828183	0.874347	0.963777	2.22103	0.973269	-1.19032	0.0395124
XLOC_003653	Slfn9	chr11:82793804-82805332	4.6524	3.26153	3.53566	6.14946	1.76474	1.84562	1.49376	2.69039	4.39976	1.94863	-1.17497	0.0132164
XLOC_006454	Dpysl2	chr14:67421700-67487437	22.4026	14.0387	13.39	22.5828	9.97559	7.83912	7.11313	7.2189	18.1035	8.03669	-1.1716	0.00859012
XLOC_019492	Coro1a	chr7:133843287-133848268	5.14072	7.27811	4.44521	2.66304	3.4786	2.52182	1.75257	0.975677	4.88177	2.18217	-1.16164	0.0485962
XLOC_020103	Hsd11b2	chr8:108042645-108047888	3.25113	2.04134	3.23582	1.96579	1.38328	1.21442	1.26806	0.830603	2.62352	1.17409	-1.15996	0.00859112
XLOC_019904	Gdf1	chr8:72839673-72877172	11.6519	5.8914	12.9341	8.156	6.66769	3.51487	3.72768	3.41204	9.65835	4.33057	-1.15722	0.0247974
XLOC_001917	Dse	chr10:33871198-33927357	6.57671	8.36977	6.92727	7.55986	3.11696	3.96187	2.79327	3.33212	7.3584	3.30105	-1.15647	0.000124645
XLOC_015513	Glt1d1	chr5:128112631-128187890	9.21501	8.28724	11.8567	6.24941	1.86952	5.8636	2.35885	5.89249	8.90209	3.99611	-1.15555	0.0217797
XLOC_015301	Mthfd2l	chr5:91360221-91450395	2.92598	2.86641	2.45167	2.6217	1.47796	1.73334	0.832386	0.881208	2.71644	1.23122	-1.14162	0.000981029
XLOC_010219	Actn3	chr19:4861215-4877909	1.56273	1.09881	0.943635	1.39342	0.772991	0.591201	0.2902	0.61343	1.24965	0.566956	-1.14022	0.0074626
XLOC_021715	Acsbg1	chr9:54452803-54509692	1.91648	1.06578	1.78704	1.30677	0.90342	1.03494	0.296333	0.538232	1.51902	0.693231	-1.13173	0.0197228
XLOC_016941	Bicd1	chr6:149357407-149507379	4.41955	4.63637	4.95725	6.97679	2.15697	2.58458	1.99141	2.89602	5.24749	2.40725	-1.12424	0.00381933
XLOC_023087	Prps2	chrX:163784264-163820631	14.5651	14.1981	16.6247	18.7314	7.21177	8.01385	6.55896	7.76851	16.0298	7.38827	-1.11745	0.00022024
XLOC_006630	Laptm4b	chr15:34167780-34214050	40.1846	34.7219	39.5807	33.2028	21.2308	13.0067	22.3196	11.5258	36.9225	17.0207	-1.11721	0.000898207
XLOC_003930	Pitpnc1	chr11:107069205-107332034	4.68008	3.68945	4.32961	5.50619	2.86087	1.54903	1.63156	2.35318	4.55133	2.09866	-1.11682	0.00244994
XLOC_000179	Igfbp2	chr1:72871053-72899045	136.396	106.354	113.572	96.0776	97.6713	38.7772	40.6125	31.84	113.1	52.2252	-1.11478	0.0131643
XLOC_006911	Grasp	chr15:101051621-101063187	3.88386	2.44419	2.925	3.1054	2.32679	1.34144	0.92854	1.11006	3.08961	1.42671	-1.11474	0.00847611
XLOC_010840	Lypd6	chr2:49921948-50049089	1.24282	0.907583	1.48832	1.86418	0.703683	0.436303	0.663691	0.73835	1.37573	0.635507	-1.11421	0.0131866
XLOC_005250	Fgf10	chr13:119503505-119581380	4.296	5.4053	3.52279	2.98358	2.97425	1.91703	0.844981	1.76858	4.05192	1.87621	-1.11078	0.0189232
XLOC_003171	Bahcc1	chr11:120094260-120153611	14.6265	9.58204	12.7311	15.0429	10.141	4.30476	4.78058	4.85887	12.9956	6.0213	-1.10988	0.00944685
XLOC_022654	Slc9a7	chrX:19682880-19868890	1.77774	1.14664	1.08922	1.51758	0.503414	1.17994	0.547911	0.338641	1.38279	0.642477	-1.10587	0.0236786
XLOC_017866	Dpf1	chr7:30089023-30102605	2.52823	2.51834	2.66945	2.25395	1.36104	1.11208	0.955343	1.21663	2.49249	1.16127	-1.10188	3.47813e-05
XLOC_015620	Fscn1	chr5:143722033-143734868	163.19	109.801	129.604	135.05	85.9093	57.9001	63.4939	43.8691	134.411	62.7931	-1.09798	0.00224005
XLOC_003889	Gjc1	chr11:102660791-102681000	6.80724	4.96428	4.14234	5.47537	4.51453	2.49625	1.04276	1.96093	5.34731	2.50362	-1.0948	0.0216198
XLOC_006731	Kifc2	chr15:76491070-76498626	3.99399	2.69715	2.01395	2.96992	1.30617	1.11559	1.70237	1.35039	2.91875	1.36863	-1.09262	0.0111607
XLOC_001257	Sertad4	chr1:194670681-194681946	2.42046	2.26926	1.96425	3.0262	1.31698	0.759921	0.98532	1.51074	2.42004	1.14324	-1.0819	0.00379415
XLOC_012446	Zfp334	chr2:165202935-165213759	8.46298	4.51211	6.88132	10.1179	5.51403	3.03546	2.06662	3.6365	7.49358	3.56315	-1.0725	0.030618
XLOC_009665	Nr3c1	chr18:39570198-39646899	1.31134	1.9617	1.65253	1.55664	0.756177	0.817026	0.908433	0.61754	1.62055	0.774794	-1.0646	0.00123107
XLOC_022926	Nap1l2	chrX:100379397-100382003	1.69128	1.25775	1.5262	1.16907	0.394967	0.66866	0.46457	1.17565	1.41107	0.675962	-1.06178	0.0137606
XLOC_020035	Mmp2	chr8:95351226-95377319	4.10516	2.02465	3.45563	4.42681	2.24668	1.29216	1.41687	1.75808	3.50306	1.67845	-1.06149	0.0190758
XLOC_017143	Vopp1	chr6:57702257-57775119	1.80847	1.29268	1.67355	1.19451	1.29165	0.724232	0.469165	0.377005	1.4923	0.715513	-1.06049	0.0219624
XLOC_022022	Csrnp1	chr9:119880283-119893776	7.7842	6.02422	10.1025	7.84717	5.47484	3.23831	3.92339	2.62242	7.93952	3.81474	-1.05747	0.00729893
XLOC_020560	Neto2	chr8:88160486-88214908	2.41169	2.56321	2.49939	3.207	1.18075	1.3429	0.911001	1.73058	2.67032	1.29131	-1.04818	0.00148261
XLOC_008943	Angptl4	chr17:33911844-33918520	4.42352	3.24494	3.38688	3.71565	1.65623	2.39072	0.982045	2.11445	3.69275	1.78586	-1.04807	0.0032856
XLOC_000206	Des	chr1:75356918-75364290	1.15543	0.871586	1.29594	0.780346	0.544178	0.328561	0.61702	0.497207	1.02583	0.496742	-1.04622	0.00781868
XLOC_008391	Adamts10	chr17:33661140-33690727	3.12846	2.92844	2.36093	2.43333	2.33221	1.18071	1.13354	0.620355	2.71279	1.3167	-1.04285	0.0139916
XLOC_005381	Sox4	chr13:29042598-29045551	66.8782	46.9518	46.6936	40.9552	47.2213	20.0579	19.0263	11.5107	50.3697	24.454	-1.04248	0.0364729
XLOC_022965	Tspan6	chrX:130425608-130432968	25.6476	36.9536	18.2355	22.9766	13.4285	12.7496	12.3713	11.859	25.9533	12.6021	-1.04226	0.0154581
XLOC_001244	Vash2	chr1:192771524-192803175	7.73851	5.26067	6.52399	8.0416	3.97957	3.02968	3.06662	3.31148	6.89119	3.34684	-1.04196	0.00187235
XLOC_001376	Mical1	chr10:41196119-41206836	5.54524	8.17069	4.98202	5.82328	3.73932	2.70059	2.95271	2.52401	6.13031	2.97916	-1.04106	0.0057382
XLOC_009093	Ttbk1	chr17:46579396-46624624	2.46018	1.16015	2.08796	1.65963	1.56008	0.996164	0.530838	0.494539	1.84198	0.895405	-1.04064	0.0449795
XLOC_006964	Slc1a3	chr15:8584123-8660807	3.78154	4.45271	5.80175	4.1472	3.32648	2.05408	1.16679	2.31358	4.5458	2.21523	-1.03708	0.00980101
XLOC_015637	Nptx2	chr5:145306755-145318347	11.4427	8.23085	6.98394	6.26617	5.75412	2.99097	3.88707	3.4125	8.23091	4.01117	-1.03703	0.0173848
XLOC_015480	A930024E05Rik	chr5:123439362-123448350	2.29017	2.34863	2.16425	2.39781	1.30388	1.5092	0.615799	1.05892	2.30022	1.12195	-1.03576	0.00102524
XLOC_004649	4930447C04Rik	chr12:73982095-74018752	1.00047	2.51628	3.03384	2.38571	0.830018	1.12985	1.20835	1.19444	2.23407	1.09066	-1.03447	0.0418064
XLOC_005155	2210408I21Rik	chr13:77274796-77752940	6.09379	7.91979	4.1951	8.15673	2.55848	4.27423	2.30657	3.73572	6.59135	3.21875	-1.03407	0.0172784
XLOC_018340	Pde3b	chr7:121558767-121681451	6.78452	6.30963	6.26611	8.74446	5.02736	2.99794	3.14496	2.5864	7.02618	3.43916	-1.03068	0.00411445
XLOC_014084	Bai2	chr4:129662321-129699877	2.71592	1.21256	2.05388	2.0954	1.76515	0.586334	0.950315	0.657132	2.01944	0.989733	-1.02884	0.0458914
XLOC_004587	Stxbp6	chr12:45953472-46175470	7.37266	7.36103	7.36121	9.2884	3.56139	4.91619	3.29066	3.68399	7.84582	3.86306	-1.02218	0.000569187
XLOC_013777	Msantd3	chr4:48552817-48574792	17.6673	17.6624	16.9061	17.242	10.3799	7.75043	7.71138	8.50573	17.3695	8.58686	-1.01635	1.0326e-05
XLOC_002988	Igfbp4	chr11:98902573-98913957	73.5948	65.7851	53.7492	41.1052	40.1648	15.6196	41.594	18.8173	58.5586	29.0489	-1.0114	0.0244475
XLOC_018708	Ppm1n	chr7:19862155-19865398	1.73701	1.77949	2.30757	1.67148	1.15846	0.788512	1.15936	0.619477	1.87389	0.931452	-1.00848	0.00325005
XLOC_000822	Igfbp5	chr1:72904638-72921439	9.35728	6.52051	5.55582	6.5752	2.46879	3.47224	4.99903	2.99445	7.0022	3.48363	-1.00722	0.0117011
XLOC_014329	Pdp1	chr4:11885331-11893597	1.30972	2.06992	2.03624	1.91734	0.790502	0.809286	0.646303	1.40997	1.8333	0.914015	-1.00416	0.00954154
XLOC_008566	Trerf1	chr17:47277890-47496407	5.75926	4.19381	4.35665	5.32846	2.70512	2.67392	2.46561	1.99396	4.90954	2.45965	-0.997135	0.00101314
XLOC_022909	Slc7a3	chrX:98274559-98280691	55.3602	35.3357	62.4462	61.7069	36.131	28.162	18.601	25.084	53.7122	26.9945	-0.992586	0.0105824
XLOC_015332	Fgf5	chr5:98683202-98706049	47.0695	41.2194	51.0145	57.5046	43.1324	22.0877	13.7174	19.9788	49.202	24.7291	-0.992509	0.0149006
XLOC_021309	Camkv	chr9:107838250-107852022	4.84411	3.33339	5.58862	4.16612	2.33115	2.30208	3.4424	0.940284	4.48306	2.25398	-0.99201	0.0192383
XLOC_005470	Gprin1	chr13:54838033-54851030	0.924037	1.07452	1.12815	1.01292	0.495181	0.445663	0.835309	0.307639	1.03491	0.520948	-0.99029	0.00525182
XLOC_003868	Etv4	chr11:101631055-101646624	17.6738	17.9345	13.2013	12.2804	13.5235	5.43586	6.57159	5.24692	15.2725	7.69447	-0.989043	0.0215354
XLOC_006982	Basp1	chr15:25293031-25343519	66.64	57.189	42.5094	45.0756	36.529	34.548	17.4323	18.2097	52.8535	26.6797	-0.986254	0.0137105
XLOC_009179	Efna5	chr17:62952305-63230666	6.58739	5.87353	6.34959	7.10235	3.74394	3.77827	2.2549	3.31571	6.47822	3.2732	-0.984892	0.000331402
XLOC_023060	Cnksr2	chrX:154259504-154481042	1.85177	1.5067	1.31366	1.68819	0.893176	0.75058	0.599814	0.972547	1.59008	0.804029	-0.983779	0.00147189
XLOC_009608	Celf4	chr18:25636120-25912484	2.99633	2.46799	3.54849	4.11332	2.23184	1.20097	1.26077	1.95468	3.28153	1.66206	-0.981393	0.0100051
XLOC_021418	1700048O20Rik	chr9:121846392-121856134	1.31219	1.90096	1.47698	1.28919	0.706036	0.720956	1.03472	0.571468	1.49483	0.758295	-0.97915	0.00523923
XLOC_019777	Sfrp1	chr8:24521973-24560104	19.2642	24.6691	22.4176	17.3688	11.0668	13.3464	7.83667	10.2625	20.9299	10.6281	-0.977684	0.00202132
XLOC_011615	A930004D18Rik	chr2:17946815-17959368	3.06339	2.04245	3.05567	2.90824	2.49653	0.77743	0.998017	1.36042	2.76744	1.4081	-0.974802	0.0241069
XLOC_000847	Ptprn	chr1:75243615-75260783	2.03453	1.04986	0.887225	1.42267	0.89232	0.696684	0.691067	0.464699	1.34857	0.686192	-0.974746	0.0490979
XLOC_010947	Slc43a3	chr2:84776802-84798666	3.06398	2.35533	2.73885	2.50518	1.26257	1.81765	1.4544	0.905473	2.66583	1.36002	-0.970956	0.00177976
XLOC_008423	Gpsm3	chr17:34726750-34728699	2.31207	2.35647	3.0722	2.16118	2.04498	0.791246	1.38809	0.837238	2.47548	1.26539	-0.968128	0.0146281
XLOC_017883	Nfkbid	chr7:31208322-31213765	1.45433	0.51645	1.26541	1.28338	0.577616	0.78932	0.44055	0.512068	1.12989	0.579889	-0.962338	0.0479635
XLOC_022121	Lancl3	chrX:8777098-8845211	1.95973	1.03602	2.19343	2.33097	1.16232	0.972383	0.341305	1.3914	1.88004	0.966852	-0.959394	0.0479549
XLOC_014964	Slc45a1	chr4:150003504-150026283	2.0479	1.571	1.63046	1.71193	1.72642	0.558424	0.875688	0.426935	1.74032	0.896867	-0.956389	0.0349813
XLOC_014886	Padi3	chr4:140341283-140366563	0.89767	1.26435	1.29199	0.582992	0.485183	0.639235	0.481518	0.474708	1.00925	0.520161	-0.956254	0.0299129
XLOC_012448	Slc13a3	chr2:165230794-165298697	2.24226	1.8522	2.56205	1.54201	1.13909	1.10029	1.39943	0.60655	2.04963	1.06134	-0.949477	0.0119336
XLOC_022836	Pdzd4	chrX:71038695-71070308	45.2716	24.793	39.9056	38.6419	27.6833	16.0516	18.0582	15.296	37.153	19.2723	-0.946953	0.0140404
XLOC_005099	Dapk1	chr13:60703307-60864547	20.0031	15.741	17.1131	17.5468	15.1782	8.05912	6.00331	7.32607	17.601	9.14167	-0.945127	0.00922399
XLOC_003755	Tbkbp1	chr11:96997484-97011026	3.98039	2.74918	2.91939	2.3902	2.46772	1.0003	1.74057	1.05658	3.00979	1.56629	-0.942309	0.0247967
XLOC_006669	Mal2	chr15:54402920-54434401	3.04881	4.67723	5.11394	5.52254	1.62651	2.97026	1.62579	3.35774	4.59063	2.39508	-0.938621	0.020755
XLOC_001388	Cd24a	chr10:43298974-43304071	91.7994	175.822	102.469	111.392	50.1084	70.0413	65.2163	65.9063	120.371	62.8181	-0.938231	0.0251195
XLOC_004900	Zfp184	chr13:22036962-22052354	6.91998	8.70719	5.70838	7.11287	3.94962	4.75816	2.80138	3.35332	7.1121	3.71562	-0.936674	0.00385495
XLOC_008869	Arhgdig	chr17:26336127-26338295	7.75536	4.58602	6.01539	5.33074	4.07784	2.5121	2.94461	2.85523	5.92188	3.09745	-0.934976	0.00976659
XLOC_001077	Ralgps2	chr1:158734296-158869757	6.86763	6.81211	7.8052	10.7399	5.07362	4.65026	2.40701	4.80264	8.05621	4.23338	-0.92829	0.0136945
XLOC_010308	Myrf	chr19:10282760-10315238	21.7243	12.3538	18.9446	22.4365	12.3864	10.6712	7.87484	8.76647	18.8648	9.92473	-0.926597	0.0118653
XLOC_020262	Ctxn1	chr8:4257645-4259274	13.3039	8.99289	12.0922	9.90172	6.0647	5.52214	5.09767	6.65444	11.0727	5.83474	-0.924264	0.00241124
XLOC_020467	Tmem59l	chr8:73007769-73011257	8.72503	8.42526	7.86304	6.16622	7.17466	3.81854	2.03065	3.44259	7.79489	4.11661	-0.921071	0.0243339
XLOC_021258	Dzip1l	chr9:99530013-99569675	4.01745	3.21054	2.22305	3.51233	2.38793	1.7828	1.21479	1.4778	3.24084	1.71583	-0.917462	0.0153007
XLOC_000471	Ankrd45	chr1:163072842-163100638	1.32882	1.00113	1.14638	0.945662	0.813203	0.45283	0.442914	0.635944	1.1055	0.586223	-0.915176	0.00546234
XLOC_015778	Fndc4	chr5:31594618-31598250	7.92278	6.31229	4.183	4.75751	3.94561	3.27691	2.52327	2.60338	5.7939	3.08729	-0.908191	0.0241383
XLOC_017835	Zfp607	chr7:28645603-28665844	1.84599	2.31138	3.48614	2.67783	1.79105	0.846227	1.36872	1.49716	2.58033	1.37579	-0.907299	0.0234021
XLOC_009658	Arap3	chr18:38132276-38158623	2.02582	1.47315	1.72004	1.87879	1.58391	0.921589	0.915667	0.366535	1.77445	0.946925	-0.906049	0.023956
XLOC_008158	Rps6ka2	chr17:7374463-7507664	10.5907	10.6703	14.4726	11.0172	10.4361	4.4074	4.50551	5.66651	11.6877	6.25388	-0.902168	0.0187573
XLOC_019087	D7Ertd715e	chr7:67114462-67119317	36.9071	47.1543	37.8775	62.1778	32.0597	24.1598	20.6694	21.6967	46.0292	24.6464	-0.901172	0.0155845
XLOC_018942	Nudt19	chr7:36332203-36340947	25.5775	27.3346	21.9636	18.5226	14.1873	9.7345	17.2915	8.82452	23.3496	12.5095	-0.900377	0.00804578
XLOC_006284	Otx2	chr14:49277858-49282547	51.3106	42.8049	60.6637	65.273	33.1216	30.4052	19.6873	34.7848	55.013	29.4997	-0.899072	0.00554574
XLOC_009621	Nrep	chr18:33596672-33623683	3.6495	4.92415	3.95928	4.36548	2.0643	2.3945	2.58762	2.03061	4.2246	2.26926	-0.896595	0.000695858
XLOC_022550	Rragb	chrX:149574500-149606486	14.6761	15.521	17.4639	18.4364	9.08354	8.085	7.1934	11.2396	16.5243	8.90038	-0.892654	0.000799796
XLOC_015167	Crmp1	chr5:37633296-37683402	14.9572	10.5609	15.9884	17.4941	11.191	7.39875	4.85773	8.35441	14.7502	7.95047	-0.891617	0.0139894
XLOC_015814	Nsg1	chr5:38528431-38550706	1.67612	2.05969	2.60887	1.58551	0.820724	1.28363	0.896886	1.2751	1.98255	1.06908	-0.890979	0.013236
XLOC_012615	Bbs12	chr3:37211475-37220373	2.77742	2.96069	1.82257	3.01552	1.87865	1.17352	1.41399	1.25634	2.64405	1.43063	-0.886104	0.00904528
XLOC_000491	Gpr161	chr1:167225896-167251982	3.0579	2.86165	1.65768	2.3903	1.63855	1.42429	0.626545	1.71536	2.49188	1.35119	-0.883009	0.0288028
XLOC_018393	Sbk1	chr7:133416132-133438513	18.2697	11.4296	21.6603	16.7786	13.3518	10.1221	7.40092	6.21768	17.0345	9.27313	-0.877336	0.0265241
XLOC_008371	Pde9a	chr17:31523178-31613254	1.00186	1.23824	0.816739	0.987461	0.560309	0.692378	0.353221	0.598359	1.01107	0.551067	-0.875591	0.00639508
XLOC_001919	Marcks	chr10:36853048-36858732	39.9123	30.6032	39.8976	48.8505	27.9642	25.7481	16.6886	16.4663	39.8159	21.7168	-0.874533	0.0091458
XLOC_012542	Pkia	chr3:7366603-7445365	1.65304	1.71077	1.59852	1.66579	1.11119	0.813242	1.10807	0.584349	1.65703	0.904213	-0.873866	0.00114001
XLOC_013945	Ttc39a	chr4:109079704-109117350	6.0695	5.71561	6.1791	5.33986	2.37922	4.9276	4.02999	1.42415	5.82602	3.19024	-0.868845	0.0176475
XLOC_022438	Zfp711	chrX:109714134-109748671	1.22222	1.52632	1.07462	0.816391	0.413461	0.838801	0.811165	0.479235	1.15989	0.635665	-0.867645	0.0296299
XLOC_022975	Armcx6	chrX:131282993-131285958	1.92888	2.22415	1.67331	1.7121	1.24303	1.2895	0.884851	0.715633	1.88461	1.03325	-0.867072	0.0039838
XLOC_021288	Pcbp4	chr9:106356168-106368271	123.885	105.658	108.548	90.0667	86.7862	50.7746	57.8801	39.6146	107.039	58.7639	-0.865141	0.00753915
XLOC_018822	Tmem91	chr7:26454158-26460185	1.63972	1.28576	1.93412	2.28056	0.889466	0.585483	1.45488	0.991831	1.78504	0.980415	-0.864492	0.0275511
XLOC_004548	Sox11	chr12:28019132-28027583	28.3188	21.4301	22.7003	29.0035	21.635	13.5334	11.311	9.25117	25.3632	13.9326	-0.864266	0.0138731
XLOC_012556	Car13	chr3:14641726-14663002	2.81828	5.32199	3.99864	3.11088	1.86773	2.03316	1.90846	2.57187	3.81245	2.09531	-0.863557	0.0261668
XLOC_013242	Golim4	chr3:75680305-75760753	5.243	4.84063	4.49099	5.00961	3.26933	2.64542	1.68155	3.16926	4.89606	2.69139	-0.863269	0.00142871
XLOC_016538	Fam188b	chr6:55153376-55270216	2.48059	2.1078	2.40564	2.45549	2.2042	1.03847	1.24058	0.714477	2.36238	1.29943	-0.86236	0.0185325
XLOC_010867	Gca	chr2:62502383-62532166	4.06559	2.85384	3.9889	5.94459	1.61321	2.98698	2.28353	2.38665	4.21323	2.31759	-0.8623	0.035066
XLOC_001674	Dusp6	chr10:98725864-98730123	48.4208	45.8861	41.8655	46.8063	45.8473	18.4095	21.0333	15.4199	45.7447	25.1775	-0.861469	0.0277817
XLOC_013630	Cth	chr3:157557211-157588027	12.978	17.6241	8.21427	10.9801	6.00037	4.31699	8.63726	8.50732	12.4491	6.86548	-0.85861	0.0470156
XLOC_007760	Srl	chr16:4480227-4523053	5.49384	4.26088	5.92375	6.03974	3.57462	3.47796	2.58984	2.33559	5.42955	2.9945	-0.858517	0.00316129
XLOC_013910	Dab1	chr4:104040164-104417447	5.712	10.6528	7.83695	10.1043	7.355	2.79394	4.08633	4.69088	8.57651	4.73154	-0.858082	0.0412275
XLOC_007865	Thpo	chr16:20724526-20742457	1.6735	2.28604	1.25125	1.42825	0.823817	0.648258	1.3202	0.872722	1.65976	0.916249	-0.857163	0.0319952
XLOC_012299	Ovol2	chr2:144130911-144157816	3.4491	3.15061	3.35149	1.8025	2.60593	1.03155	1.3113	1.54359	2.93843	1.62309	-0.856298	0.0433358
XLOC_009764	Mapk4	chr18:74088140-74224603	5.69308	4.5675	8.1944	8.47293	5.72372	3.2379	3.20925	2.74376	6.73198	3.72866	-0.852374	0.0423666
XLOC_021850	Elovl4	chr9:83672298-83699912	1.94744	1.55329	1.6164	2.06971	1.07352	1.3504	0.781014	0.789883	1.79671	0.998704	-0.847228	0.00497763
XLOC_002654	Myh10	chr11:68505416-68630126	41.1077	27.9314	38.4463	48.9032	27.2189	21.9207	15.9916	21.8113	39.0971	21.7356	-0.847002	0.0121974
XLOC_011816	Cd302	chr2:60090049-60122475	1.34813	2.22319	1.72206	1.23622	0.732377	0.458767	1.32157	1.11935	1.6324	0.908016	-0.846205	0.0493312
XLOC_014229	Gm13139	chr4:146506201-146887529	23.5534	37.6491	24.9602	31.8701	13.0888	16.2456	19.7893	16.6224	29.5082	16.4365	-0.844211	0.010198
XLOC_019248	Relt	chr7:107994361-108011927	4.92753	5.05532	3.85554	3.83508	3.84731	2.10244	1.86034	2.03788	4.41837	2.46199	-0.843687	0.0140338
XLOC_012550	Chmp4c	chr3:10366972-10391005	6.48222	7.59892	8.85256	10.8448	5.07798	4.57715	3.86314	5.35814	8.44463	4.7191	-0.839521	0.00940302
XLOC_009499	Grp	chr18:66033147-66046233	1.1844	1.49731	2.30428	1.6148	0.725203	0.979643	0.756938	1.22815	1.6502	0.922484	-0.839044	0.0327258
XLOC_020219	Tubb3	chr8:125935463-125945910	6.80231	5.48484	4.98351	4.27553	3.96591	2.70643	2.73602	2.64958	5.38655	3.01449	-0.837449	0.00873782
XLOC_020857	Bmper	chr9:23027519-23289646	3.10782	2.53308	2.41231	1.58023	1.9572	1.37188	0.931112	1.1334	2.40836	1.3484	-0.836805	0.0332707
XLOC_001440	Nodal	chr10:60880719-60888085	12.5928	14.73	14.2697	12.0377	12.5307	5.36983	5.58879	6.55118	13.4076	7.51012	-0.836137	0.0173922
XLOC_021176	Myo5a	chr9:74919012-75071494	7.93331	6.13091	7.78033	11.1605	5.04849	5.36442	3.40673	4.74485	8.25126	4.64112	-0.830141	0.0191755
XLOC_022585	Gpm6b	chrX:162676874-162826965	1.73546	1.78117	1.58461	1.53702	0.952218	1.25196	0.971117	0.568806	1.65957	0.936025	-0.826186	0.00312856
XLOC_006321	Ndrg2	chr14:52524945-52533163	3.7345	4.09021	4.3432	3.95084	3.45818	1.76753	1.34467	2.5362	4.02969	2.27665	-0.823759	0.0108616
XLOC_018704	Foxa3	chr7:19598631-19608888	9.36022	13.0249	8.87597	7.30892	4.07563	4.14492	8.63581	4.97946	9.6425	5.45895	-0.820783	0.0416863
XLOC_019844	Casp3	chr8:47702802-47724062	35.4061	38.0182	32.0244	42.952	24.6042	17.8443	19.4691	22.1796	37.1002	21.0243	-0.819368	0.00109423
XLOC_013678	Faxc	chr4:21858472-21928608	2.26511	2.15976	1.97132	3.01526	1.61488	1.53568	0.860756	1.33647	2.35286	1.33695	-0.815475	0.0118121
XLOC_019813	Dusp4	chr8:35870663-35882948	33.0935	27.3637	40.7852	30.7262	28.7892	13.5004	23.8445	8.88835	32.9922	18.7556	-0.8148	0.0385678
XLOC_017824	Sertad3	chr7:28258858-28262383	2.46998	4.05814	4.45648	2.3506	1.91727	1.93382	1.59706	2.13324	3.3338	1.89535	-0.814705	0.0401306
XLOC_006332	Sall2	chr14:52930851-52948345	32.4362	18.0456	26.6162	25.8444	20.6425	15.8387	9.7463	12.3414	25.7356	14.6422	-0.813631	0.0261423
XLOC_022919	Hdac8	chrX:99479978-99700487	1.80969	2.54896	2.52498	2.831	1.57836	2.19737	0.947197	0.80677	2.42866	1.38242	-0.812959	0.0352311
XLOC_002243	Hmga2	chr10:119798330-119913991	29.5886	23.3417	16.7777	24.1092	17.6791	15.1613	8.19913	12.5408	23.4543	13.3951	-0.808149	0.0229583
XLOC_001729	9230105E05Rik	chr10:119798330-119913991	2.55947	2.01917	1.57441	2.1063	1.91095	0.71008	1.23672	0.866302	2.06484	1.18101	-0.806003	0.0385794
XLOC_011616	Skida1	chr2:17965713-17970076	8.37528	6.55326	6.6547	7.18788	6.03818	3.99099	2.83461	3.60414	7.19278	4.11698	-0.804963	0.00858923
XLOC_022241	Phf6	chrX:50265442-50310120	19.6959	20.1416	23.3653	30.6035	14.7581	12.8353	11.9216	14.1979	23.4516	13.4282	-0.804416	0.00842846
XLOC_000157	Zdbf2	chr1:63319842-63361149	6.46443	5.75809	6.61368	7.86841	4.43059	4.36687	2.8202	3.68253	6.67615	3.82505	-0.803539	0.00261387
XLOC_013053	Mcoln3	chr3:145784754-145803610	1.91505	1.87015	2.84998	1.89252	0.964418	1.49144	1.30776	1.12584	2.13192	1.22236	-0.802482	0.0139779
XLOC_022240	Ccdc160	chrX:50144376-50152645	0.760926	1.16054	0.80073	1.45282	0.619108	0.629258	0.692588	0.454432	1.04375	0.598846	-0.801524	0.040587
XLOC_007067	H2afy3	chr15:61869541-62082530	1.5085	1.39706	2.07194	2.08776	1.44842	1.39527	0.74998	0.473882	1.76632	1.01689	-0.796582	0.0477486
XLOC_018634	Zik1	chr7:11072572-11080730	9.12153	11.1776	8.08689	10.6848	5.83791	5.1918	5.07063	6.39766	9.7677	5.6245	-0.796295	0.00175199
XLOC_004499	Cdca7l	chr12:119082333-119437516	15.5604	15.9857	18.2546	22.4794	13.8682	10.5312	8.13009	9.1525	18.07	10.4205	-0.794174	0.00906819
XLOC_016351	Mdfic	chr6:15670660-15752169	1.51671	2.06527	1.73568	1.77549	0.779176	1.10494	0.785322	1.43163	1.77329	1.02527	-0.790427	0.00801129
XLOC_002907	Mbtd1	chr11:93747532-93808298	23.9627	26.3761	29.4545	35.7303	14.8799	18.6944	15.0103	18.4222	28.8809	16.7517	-0.785808	0.00452307
XLOC_011837	Stk39	chr2:68048503-68310038	10.7093	9.32039	10.2079	12.2075	6.52083	6.4521	4.64409	7.00672	10.6113	6.15593	-0.785548	0.00139088
XLOC_018181	Lipt2	chr7:107307786-107309441	7.86263	6.28991	5.57299	5.40557	3.71133	3.59193	4.80688	2.47038	6.28277	3.64513	-0.785432	0.011613
XLOC_022947	Fndc3c1	chrX:103615381-103680568	4.93349	6.56061	8.20053	10.5321	5.41611	4.15837	3.29814	4.67109	7.55668	4.38593	-0.784871	0.0474082
XLOC_020245	Nrp1	chr8:130882972-131029375	2.97339	4.05948	4.45792	2.20057	1.49041	2.60485	1.7388	2.13268	3.42284	1.99168	-0.781204	0.0455531
XLOC_004072	Dnmt3a	chr12:3806979-3914443	32.2991	24.1414	36.0161	33.4356	19.5255	19.1367	19.2602	15.3842	31.4731	18.3267	-0.780174	0.00304467
XLOC_000468	Gas5	chr1:162965296-162968668	56.2911	83.5601	52.3935	78.4966	37.7209	40.2529	31.8239	48.0398	67.6853	39.4594	-0.778475	0.0160337
XLOC_015376	Fgfrl1	chr5:109123247-109135969	6.95816	6.19382	5.93777	4.44994	5.38608	2.60002	3.40758	2.34446	5.88492	3.43453	-0.776909	0.0299984
XLOC_003967	Grin2c	chr11:115110482-115128557	1.25124	1.78689	1.66867	1.35772	1.0699	0.652106	1.38528	0.438045	1.51613	0.886333	-0.774473	0.0433196
XLOC_013301	Syt11	chr3:88548622-88576521	9.62741	7.33088	10.8018	10.5103	6.32799	5.45115	4.34139	6.33884	9.5676	5.61484	-0.768911	0.00504507
XLOC_008036	Arl6	chr16:59613146-60605357	9.78306	17.4258	12.4772	10.2128	6.82311	7.11335	8.04412	7.33512	12.4747	7.32892	-0.767333	0.0272059
XLOC_003434	Zfp867	chr11:59274698-59285976	3.16579	5.23207	4.13629	5.32105	1.92865	2.42054	2.70271	3.46249	4.4638	2.6286	-0.763979	0.0225799
XLOC_013178	Setd7	chr3:51319239-51371038	13.645	9.26236	11.3822	14.0701	8.54196	7.59633	4.75688	7.59411	12.0899	7.12232	-0.763385	0.0114141
XLOC_001038	Trove2	chr1:145597920-145624181	7.19637	8.22522	8.76136	9.92644	5.26067	5.86758	4.62184	4.35992	8.52735	5.0275	-0.762255	0.00184102
XLOC_022860	Rab39b	chrX:72817396-72823543	2.14685	1.63056	1.62894	2.06101	1.44526	1.33573	0.870562	0.752236	1.86684	1.10095	-0.761853	0.012934
XLOC_022762	1700013H16Rik	chrX:51046077-51061008	2.61457	4.066	2.45845	3.27033	2.26734	1.78718	1.62276	1.6538	3.10234	1.83277	-0.75933	0.0183543
XLOC_000741	Kdelc1	chr1:44163390-44175618	14.39	12.5143	13.9607	18.8459	9.57611	8.81633	7.7831	9.1466	14.9277	8.83054	-0.757422	0.00510625
XLOC_016227	Pilra	chr5:138229029-138277506	2.46169	2.5906	2.38879	1.86816	1.275	1.18689	1.89096	1.15823	2.32731	1.37777	-0.756328	0.00674742
XLOC_013979	Pik3r3	chr4:115894518-115975661	2.94952	3.3413	3.2676	3.5373	1.647	2.31657	1.45592	2.33821	3.27393	1.93942	-0.755394	0.00207573
XLOC_003433	Snap47	chr11:59220651-59263458	21.9267	17.7895	22.6404	20.5056	12.6682	12.3834	13.3597	10.7867	20.7156	12.2995	-0.752114	0.000422639
XLOC_018511	B4galnt4	chr7:148247172-148258018	5.58685	3.08703	4.41789	5.69967	3.70768	2.58261	3.27116	1.60107	4.69786	2.79063	-0.751413	0.0466775
XLOC_014024	Mycl1	chr4:122673341-122679723	17.7037	13.8563	14.8847	15.6198	15.6407	7.15046	8.34064	5.7699	15.5161	9.22543	-0.750081	0.0365541
XLOC_017496	Gpr19	chr6:134819109-134847943	5.81593	4.89621	3.97375	4.7172	2.43839	2.76895	3.20582	3.14314	4.85077	2.88908	-0.747607	0.00337491
XLOC_003266	Slc1a4	chr11:20202182-20232716	5.38608	5.44951	5.36889	6.34847	4.41718	2.03128	2.87798	4.11276	5.63824	3.3598	-0.746869	0.00917309
XLOC_015811	Evc	chr5:37690409-37728120	3.39253	2.43116	2.50552	2.08991	1.42311	1.30306	1.58754	1.90973	2.60478	1.55586	-0.743449	0.0142651
XLOC_013924	Hspb11	chr4:106926538-106952493	5.69605	5.34792	5.02058	5.24009	3.31776	2.97779	3.01627	3.42874	5.32616	3.18514	-0.741739	2.1011e-05
XLOC_008057	D16Ertd472e	chr16:78540580-78576933	3.08858	2.35496	2.16896	3.54804	1.81339	2.02065	1.28064	1.56523	2.79014	1.66998	-0.740506	0.0205329
XLOC_017574	Brsk1	chr7:4642529-4676853	5.38447	4.44968	5.80337	4.61879	4.85083	2.81553	1.91337	2.56277	5.06408	3.03563	-0.738306	0.028936
XLOC_010640	Gm17762	chr2:17946815-17959368	1.38087	1.04674	1.38525	1.39334	1.08693	0.574198	0.78827	0.673385	1.30155	0.780696	-0.737398	0.00979678
XLOC_022950	Itm2a	chrX:104592533-104598699	7.50064	9.91408	7.60243	6.34176	3.26113	6.09032	3.88352	5.59058	7.83973	4.70639	-0.736183	0.0208498
XLOC_005479	Dbn1	chr13:55574788-55589437	31.4055	25.7783	22.4664	23.8944	23.4062	17.192	9.54508	12.0552	25.8862	15.5496	-0.735301	0.0295195
XLOC_003106	Gprc5c	chr11:114712845-114733931	13.266	17.7745	15.2011	10.1349	8.15086	8.67879	11.8248	5.31542	14.0941	8.49247	-0.730838	0.0366053
XLOC_023012	Acsl4	chrX:138752535-138825078	33.2033	36.1443	42.8348	44.2659	19.2296	23.8686	23.3926	27.7977	39.1121	23.5721	-0.730532	0.00272648
XLOC_000538	Igsf9	chr1:174412343-174429008	12.2637	8.19366	10.6731	12.3121	9.13819	5.43238	6.79898	4.8179	10.8606	6.54686	-0.730234	0.0193387
XLOC_020437	Cpe	chr8:67071348-67171837	6.35232	4.20695	5.43591	6.48543	4.63818	3.41364	3.26583	2.23417	5.62015	3.38795	-0.730195	0.0211421
XLOC_006686	Trib1	chr15:59480208-59488654	8.48693	5.03669	7.5803	7.36895	6.74346	3.83153	3.59437	3.00367	7.11822	4.29326	-0.729443	0.0441171
XLOC_017388	Clstn3	chr6:124380773-124414802	3.81598	2.54601	3.43429	3.08699	2.97191	2.06837	1.25018	1.48114	3.22082	1.9429	-0.729215	0.0344528
XLOC_012612	Exosc9	chr3:36451527-36470918	26.9688	32.5663	31.9865	28.5263	14.7488	18.9531	20.4541	18.3439	30.012	18.125	-0.727559	0.000602849
XLOC_017129	Ggct	chr6:54935088-54942861	12.2766	17.2306	10.3096	10.7433	8.2594	8.06381	7.89838	6.31855	12.64	7.63504	-0.727293	0.0229171
XLOC_019886	Zfp930	chr8:71732944-71754438	10.3315	19.4298	11.9106	14.1978	8.59947	8.82343	7.32623	9.00241	13.9674	8.43788	-0.727113	0.0339848
XLOC_022402	Chic1	chrX:100551814-100591457	1.70577	2.39434	2.27784	3.10939	1.38053	1.49849	1.15588	1.7077	2.37183	1.43565	-0.7243	0.0235186
XLOC_012555	E2f5	chr3:14578670-14611256	25.3408	34.4317	19.7122	21.6744	15.7611	16.5282	15.7909	13.3636	25.2898	15.3609	-0.719287	0.024723
XLOC_015108	Dpysl5	chr5:31014267-31101742	10.4686	7.83244	11.5602	10.7053	8.3921	6.40593	5.33381	4.52954	10.1416	6.16534	-0.718037	0.0140188
XLOC_022976	Armcx2	chrX:131338680-131343760	16.3558	14.7327	16.7536	15.6746	13.1776	10.6368	6.96751	7.85803	15.8792	9.65999	-0.717043	0.00561582
XLOC_019966	Zfp827	chr8:81552335-81717665	1.27771	0.965702	1.05089	1.68669	0.656065	0.745758	0.616948	1.02498	1.24525	0.760938	-0.710583	0.0401779
XLOC_001414	Msl3l2	chr10:55734099-55948495	1.95769	1.29027	2.34412	2.0553	1.57298	1.04188	1.22239	0.837854	1.91185	1.16878	-0.709967	0.0340983
XLOC_018458	Gm10584	chr7:139427937-139509974	1.9175	2.31254	2.78169	1.4495	0.993267	0.969054	1.60692	1.60606	2.11531	1.29383	-0.709225	0.0502589
XLOC_016352	Tes	chr6:17015148-17055825	20.1489	25.2884	22.0936	19.7593	16.3277	12.8643	9.79863	14.4019	21.8225	13.3481	-0.709182	0.00396818
XLOC_005399	Tubb2b	chr13:34218876-34222223	4.9821	8.33495	7.69118	6.68894	4.87619	4.50925	3.30777	4.25594	6.92429	4.23729	-0.708526	0.0155517
XLOC_000137	Fzd7	chr1:59538990-59543799	71.3121	43.5118	59.3834	57.8796	55.3324	28.9551	33.7405	24.334	58.0217	35.5905	-0.705101	0.0454619
XLOC_014823	Lin28a	chr4:133559244-133574731	232.167	237.476	269.873	251.356	130.154	126.443	206.757	144.635	247.718	151.997	-0.704653	0.0034187
XLOC_014737	Maneal	chr4:124528002-124539415	1.42515	0.829009	1.08068	1.17625	0.997239	0.56959	0.617899	0.586863	1.12777	0.692898	-0.702761	0.034687
XLOC_004651	Six4	chr12:74201245-74214232	6.0022	4.66057	5.26627	6.94168	4.91171	3.79064	2.37881	2.98383	5.71768	3.51625	-0.701393	0.0242855
XLOC_022500	Prps1	chrX:136991141-137010679	41.6891	45.3915	44.1761	53.9607	29.7078	30.1602	19.7575	34.296	46.3043	28.4804	-0.70118	0.00471291
XLOC_006867	Pfkm	chr15:97869174-97962878	12.5461	8.37135	11.8688	10.0788	5.49646	7.80362	7.69266	5.38021	10.7163	6.59324	-0.700743	0.011664
XLOC_000302	Bok	chr1:95582270-95592339	15.0616	9.44497	11.5973	10.8589	8.58029	9.0101	6.43344	4.94912	11.7407	7.24324	-0.696811	0.0256722
XLOC_018446	Plekha1	chr7:138009423-138056816	22.9833	23.9078	25.2484	33.4575	17.7649	16.8986	16.1899	14.3423	26.3993	16.2989	-0.69572	0.00687837
XLOC_011433	Gdap1l1	chr2:163264202-163281060	1.97016	1.79631	2.52305	1.4848	1.36967	1.13098	0.803506	1.50533	1.94358	1.20237	-0.692834	0.0319679
XLOC_004204	Klhdc2	chr12:70397667-70411674	57.4328	56.3672	55.0288	57.4652	43.2234	33.7073	37.2219	25.9363	56.5735	35.0222	-0.691856	0.00105724
XLOC_016703	Kbtbd8	chr6:95067899-95079781	14.8196	24.9842	16.1589	16.99	9.8623	11.8603	11.2713	12.1808	18.2382	11.2937	-0.691446	0.0254175
XLOC_007410	Zfp385a	chr15:103144325-103170517	8.12169	6.47807	8.88607	5.8077	5.20693	5.03609	4.02889	3.87315	7.32338	4.53626	-0.691005	0.0123932
XLOC_011874	Sestd1	chr2:77018396-77118649	3.71696	2.89698	4.02429	5.32448	2.75445	2.60188	1.60399	2.94264	3.99068	2.47574	-0.688774	0.0415132
XLOC_013085	Wls	chr3:159502658-159598139	20.4133	26.5061	27.6228	19.9865	15.4031	14.8239	12.2216	16.312	23.6322	14.6901	-0.685903	0.00635911
XLOC_013189	Nbea	chr3:55429119-55987623	4.9766	4.50429	4.07837	6.43456	4.5281	2.72843	2.33868	2.83364	4.99845	3.10721	-0.685861	0.036597
XLOC_013167	Sclt1	chr3:41430626-41546436	6.29765	7.80883	5.41413	6.8402	3.34583	4.04402	4.58645	4.42187	6.5902	4.09954	-0.68486	0.00480651
XLOC_018401	Ypel3	chr7:133920488-133924028	16.8995	18.9771	13.0497	14.01	13.2456	8.08276	8.40117	9.43346	15.7341	9.79075	-0.684401	0.0164443
XLOC_001686	Slc6a15	chr10:102830441-102882013	2.15657	3.19425	2.23193	2.88855	1.20546	1.3608	2.20336	1.76777	2.61782	1.63435	-0.679654	0.0268661
XLOC_003159	Ccdc40	chr11:119089885-119126526	2.55792	1.60746	2.01128	2.11843	1.86216	0.807891	1.17113	1.344	2.07377	1.2963	-0.677863	0.0381273
XLOC_006689	Pvt1	chr15:61869541-62082530	2.02398	2.61203	2.19143	2.79748	1.13478	1.89015	1.04076	1.95403	2.40623	1.50493	-0.677078	0.024314
XLOC_005766	Slc4a7	chr14:15535538-15632457	11.9515	12.5284	11.7603	15.9307	8.68001	8.14516	5.67781	10.1333	13.0427	8.15907	-0.676769	0.0110159
XLOC_014576	Elavl2	chr4:90917456-91066675	5.73407	7.59844	6.45003	7.08242	4.23294	4.15166	3.13766	5.30204	6.71624	4.20608	-0.675179	0.00571017
XLOC_004346	Ubr7	chr12:103996184-104015911	38.3576	38.3033	45.9291	48.6101	28.8538	25.03	27.5596	25.8081	42.8	26.8129	-0.674686	0.00119264
XLOC_018526	Tspan4	chr7:148661134-148725756	24.0696	29.0744	20.5803	15.8979	16.5425	14.7378	15.1649	9.73529	22.4055	14.0451	-0.673787	0.0380454
XLOC_008670	Gemin6	chr17:80623828-80627837	32.3109	44.1345	31.9843	25.7697	26.1888	20.2668	19.7664	18.0025	33.5499	21.0561	-0.672066	0.0254464
XLOC_022333	Vbp1	chrX:72759635-72780285	51.0361	72.7935	55.7136	64.7456	33.9897	47.9465	33.3547	38.1596	61.0722	38.3626	-0.670814	0.0084099
XLOC_011741	Garnl3	chr2:32841885-32942724	1.33256	2.01417	1.08025	1.25565	0.87181	0.729492	0.984781	0.986363	1.42066	0.893111	-0.669647	0.0484641
XLOC_013880	Hook1	chr4:95626401-95690965	21.9642	30.34	26.2355	32.3355	13.5389	17.783	18.8528	19.5779	27.7188	17.4382	-0.668618	0.00842398
XLOC_005953	Pck2	chr14:56159102-56168854	8.28566	7.00961	8.25089	6.21626	7.33742	4.56984	3.46914	3.38082	7.4406	4.68931	-0.666046	0.0398505
XLOC_019909	Isyna1	chr8:73118379-73121189	121.833	77.2354	98.1726	91.218	81.0181	53.9275	57.1064	52.7679	97.1148	61.205	-0.666042	0.0202243
XLOC_002689	Dlg4	chr11:69832106-69859033	3.97584	2.79601	3.07634	3.08706	3.26489	1.42413	1.78785	1.68035	3.23381	2.0393	-0.665158	0.0500428
XLOC_006539	Rnf219	chr14:104876750-104921883	8.23507	7.42097	6.01153	6.89223	5.23287	4.51557	4.29754	3.97173	7.13995	4.50443	-0.66457	0.00270845
XLOC_006667	Med30	chr15:52543999-52561986	21.7649	23.5129	21.3431	19.3596	13.675	14.7516	14.7848	11.1018	21.4951	13.5783	-0.662707	0.00062188
XLOC_000019	Sulf1	chr1:12682510-12850453	9.27499	8.49715	9.65131	11.7351	7.68471	5.87392	5.0681	6.13118	9.78964	6.18948	-0.661438	0.00648951
XLOC_016777	Cecr2	chr6:120616438-120721209	20.0492	15.7724	18.0063	25.5327	14.5608	12.8284	7.73814	15.05	19.8402	12.5443	-0.661387	0.0343151
XLOC_005290	Epdr1	chr13:19683576-19711699	2.33145	2.26841	1.91635	1.98727	1.32721	1.55651	1.44323	1.05131	2.12587	1.34457	-0.660914	0.00193583
XLOC_020796	Slc36a4	chr9:15514212-15543233	1.04772	1.09184	1.23911	0.7705	0.609042	0.602848	0.992841	0.423503	1.03729	0.657058	-0.658729	0.0493612
XLOC_022487	Fam199x	chrX:133584132-133617040	8.28345	10.4059	10.6183	12.7638	5.81576	7.34776	8.17954	5.30758	10.5179	6.66266	-0.658671	0.0144074
XLOC_016936	Far2	chr6:147995937-148392874	1.75877	2.07284	1.82156	2.55485	1.41097	1.26339	0.905179	1.63544	2.052	1.30374	-0.654373	0.0196548
XLOC_005988	Spata13	chr14:61253565-61383393	24.947	18.2743	21.5268	22.5531	18.5372	12.2842	13.5262	11.1204	21.8253	13.867	-0.654346	0.00986369
XLOC_011197	Eid1	chr2:125453182-125549884	10.3758	9.73037	8.69338	11.0802	5.5256	7.83798	7.02499	4.96113	9.96994	6.33742	-0.653688	0.00481461
XLOC_018844	Gm4636	chr7:28769489-28799134	4.31308	6.72312	5.93577	5.956	3.17877	4.09972	3.76706	3.54586	5.73199	3.64785	-0.651989	0.00856608
XLOC_018175	Arrb1	chr7:106683995-106755281	15.6245	10.6982	14.2236	14.6956	12.7542	8.38487	7.14134	6.88623	13.8105	8.79166	-0.651555	0.0276395
XLOC_010401	Rfx3	chr19:27836210-28085656	6.29462	5.4493	5.89464	9.00671	4.34686	4.22892	2.79223	5.60205	6.66132	4.24252	-0.650888	0.0494971
XLOC_016195	Hip1	chr5:135882387-136020992	10.2006	7.95148	10.6872	12.3609	6.45326	7.2961	5.8941	6.67502	10.3	6.57962	-0.646574	0.0080015
XLOC_004605	Ppp2r3c	chr12:56381800-56483478	12.6665	17.5972	12.7226	14.1252	7.7013	10.937	9.02691	8.90514	14.2779	9.14259	-0.643107	0.00852572
XLOC_019214	Ankrd42	chr7:99732692-99785652	1.70257	2.40521	1.27492	2.07302	1.41103	1.1113	1.08679	1.17697	1.86393	1.19652	-0.6395	0.039291
XLOC_020002	Syce2	chr8:87396009-87417820	57.2295	67.3472	53.9034	44.4379	41.3512	31.3541	35.6338	34.8669	55.7295	35.8015	-0.638421	0.00834445
XLOC_012336	Zcchc3	chr2:152237691-152240780	39.3256	29.7636	40.1143	39.2784	29.569	20.7732	28.9397	16.1352	37.1205	23.8543	-0.637967	0.0175125
XLOC_001270	Cnksr3	chr10:3134303-3227479	17.7639	12.5291	15.9466	18.2656	12.7427	10.0399	8.99516	9.68952	16.1263	10.3668	-0.637442	0.00952157
XLOC_015868	Atp8a1	chr5:68009379-68238670	8.83939	11.6372	11.9634	11.0042	7.32444	6.37156	6.13905	8.11204	10.861	6.98677	-0.636465	0.00357792
XLOC_019693	Ing1	chr8:11556065-11563250	29.7006	22.3285	28.6818	24.8545	23.2091	15.9673	17.2566	11.5477	26.3913	16.9952	-0.63494	0.01897
XLOC_001312	Map3k5	chr10:19654331-19862556	5.95432	4.6924	8.36836	7.99227	4.46365	3.44024	4.83652	4.65798	6.75184	4.3496	-0.634398	0.0403669
XLOC_022218	Mcts1	chrX:35953834-35966699	11.6757	19.6152	15.8291	19.2827	10.1499	15.058	9.35526	8.238	16.6007	10.7003	-0.633592	0.0482425
XLOC_007030	Nudcd1	chr15:44206772-44269231	25.1602	35.6061	24.4574	25.9777	16.5744	18.7439	18.8738	17.6807	27.8004	17.9682	-0.629657	0.0103792
XLOC_018919	Gramd1a	chr7:31915145-31936069	12.1814	9.92127	8.34597	9.1322	8.80644	6.96477	4.7862	5.03046	9.89521	6.39697	-0.629342	0.031374
XLOC_015529	Tpst1	chr5:130549195-130611602	16.319	10.0205	14.3083	17.2508	11.2683	10.072	6.759	9.38505	14.4747	9.37109	-0.62724	0.0341154
XLOC_002923	Spop	chr11:95275396-95354724	28.0642	23.3517	24.6653	26.8124	20.9553	14.2849	14.4093	16.9792	25.7234	16.6572	-0.626938	0.00297626
XLOC_002723	Ube2g1	chr11:72420762-72499983	16.2426	20.9949	20.213	22.4678	10.6252	13.9595	11.6344	15.5359	19.9796	12.9387	-0.626828	0.00664774
XLOC_001613	Chst11	chr10:82448241-82658636	2.29753	2.2904	2.8456	2.52916	1.55648	1.91613	1.23933	1.74079	2.49067	1.61318	-0.626626	0.00409575
XLOC_018106	Zscan2	chr7:88006993-88021399	1.97567	2.50313	2.83431	2.46041	1.56916	1.56461	1.78048	1.41667	2.44338	1.58273	-0.626463	0.00418697
XLOC_000585	Pycr2	chr1:182834404-182838219	38.905	27.5075	31.1058	25.0108	24.0523	17.2725	23.1453	14.9539	30.6323	19.856	-0.625477	0.0284204
XLOC_001741	Lrig3	chr10:125403274-125452415	14.5008	18.1414	14.2371	13.2977	10.8114	9.2577	10.7159	8.25194	15.0442	9.75923	-0.624372	0.00509801
XLOC_005198	Enc1	chr13:98011059-98022995	28.777	18.4697	30.6521	27.9493	20.9247	16.5672	16.6062	14.6699	26.462	17.192	-0.622186	0.022187
XLOC_012080	B230118H07Rik	chr2:101400937-101472685	3.74999	5.96541	4.53841	3.50581	2.67683	3.28923	2.47618	3.09682	4.43991	2.88476	-0.622075	0.0375645
XLOC_002027	Gstt2	chr10:75294589-75297626	8.358	8.81827	7.73131	6.35861	6.32953	4.60791	6.85806	2.57143	7.81655	5.09173	-0.618375	0.0488129
XLOC_012926	Dennd2d	chr3:106284903-106350679	0.980638	1.2934	1.33474	1.46432	1.0529	0.758172	0.56644	0.931121	1.26827	0.827158	-0.616632	0.0242367
XLOC_001981	H2afy2	chr10:61178010-61246612	14.0267	12.2984	10.0238	10.1556	10.4862	7.08707	7.20563	5.58751	11.6261	7.5916	-0.614894	0.0284932
XLOC_006272	Gnpnat1	chr14:45970860-46008471	18.1198	27.268	19.5708	23.6007	12.6646	15.0329	13.6386	16.5022	22.1398	14.4596	-0.614619	0.0136913
XLOC_014799	Snhg3	chr4:131907847-131909601	75.2368	87.9295	72.6458	61.0594	38.4155	41.4114	45.329	68.7948	74.2179	48.4877	-0.614149	0.0270007
XLOC_013883	L1td1	chr4:98393444-98405177	95.0331	94.3915	112.922	127.063	62.533	62.1679	63.0417	92.9035	107.352	70.1615	-0.613602	0.0143578
XLOC_000215	Sgpp2	chr1:78306920-78416861	7.05611	7.13135	8.6306	5.49129	4.25383	4.15803	6.35344	3.74388	7.07734	4.6273	-0.613038	0.0303123
XLOC_000465	Mrps14	chr1:162125390-162131317	16.4785	20.652	16.5149	17.0387	11.1788	12.129	12.3026	10.6362	17.671	11.5617	-0.612038	0.00129194
XLOC_013674	Ccnc	chr4:21654849-21677693	16.8659	27.657	19.7778	16.1968	11.3006	14.229	12.0803	15.0687	20.1244	13.1696	-0.611727	0.046059
XLOC_016521	Cbx3	chr6:51420614-51433703	188.163	253.587	196.307	199.298	143.159	153.472	116.826	134.674	209.339	137.033	-0.611319	0.0051124
XLOC_021243	Tfdp2	chr9:96096693-96224065	9.41808	8.51498	9.53825	11.2677	6.37175	6.34621	5.87827	6.77333	9.68475	6.34239	-0.610689	0.00146025
XLOC_000708	Sema4c	chr1:36605486-36615226	13.6709	9.47076	11.466	11.5825	9.86771	6.33206	9.12316	4.95305	11.5475	7.569	-0.609412	0.0327749
XLOC_016400	Mest	chr6:30683505-30846760	69.5554	83.7798	78.9186	80.7101	71.698	46.5645	23.869	63.0481	78.241	51.2949	-0.609109	0.0492251
XLOC_014312	Plag1	chr4:3828304-3865552	3.35641	3.97972	3.09135	4.7762	2.80322	2.66685	2.16505	2.33576	3.80092	2.49272	-0.608628	0.0174418
XLOC_022184	Dock11	chrX:33428826-33616557	9.82978	12.3073	9.96248	15.3886	8.91477	7.64103	4.96448	9.67659	11.872	7.79922	-0.606167	0.0498924
XLOC_010037	Pten	chr19:32832066-32900650	40.0331	40.5938	50.3052	64.9489	31.5114	35.7837	28.8901	32.5718	48.9702	32.1893	-0.605327	0.0312338
XLOC_018949	Ccne1	chr7:38883002-38892509	79.4933	62.4736	66.264	71.3645	49.5379	49.5284	34.699	50.0424	69.8989	45.9519	-0.605143	0.00386824
XLOC_021427	Zfp105	chr9:122832195-122840146	11.6385	11.1875	10.6081	12.3935	8.36905	7.14164	6.71168	7.93182	11.4569	7.53855	-0.603858	0.000319011
XLOC_021136	2810417H13Rik	chr9:65676732-65756601	32.2853	54.1429	36.7491	41.622	26.3428	27.2067	24.4726	30.4338	41.1998	27.114	-0.603602	0.0277872
XLOC_016718	Itpr1	chr6:108163089-108501110	8.25918	5.94105	5.50086	7.83505	6.35979	3.80358	3.49534	4.46981	6.88403	4.53213	-0.603065	0.0459908
XLOC_019068	Svip	chr7:59252530-59261388	1.94434	2.50313	2.24899	1.99718	1.14813	1.48339	1.198	1.89613	2.17341	1.43141	-0.602521	0.0134408
XLOC_012742	Mex3a	chr3:88336316-88345316	23.6134	19.4365	18.6928	20.5892	18.7701	12.7187	12.1034	10.632	20.583	13.556	-0.602515	0.0153103
XLOC_001838	Sash1	chr10:8442016-8605868	8.1279	8.39434	7.00014	8.135	5.84198	5.10272	4.89569	5.0237	7.91434	5.21602	-0.60152	0.000374777
XLOC_004858	Idi1	chr13:8884851-8891642	29.5726	40.8708	36.3148	41.0977	17.9574	28.1151	23.6967	27.7322	36.964	24.3754	-0.600697	0.0126633
XLOC_000784	Sumo1	chr1:59696277-59727678	122.483	206.934	132.097	128.333	91.2948	98.6242	93.1355	106.078	147.462	97.2831	-0.600079	0.0475183
XLOC_011833	Ttc21b	chr2:66022385-66094674	6.46098	5.96079	7.15754	9.83054	4.76461	5.16283	4.71247	4.77616	7.35246	4.85402	-0.599048	0.0281093
XLOC_009552	Cyb5	chr18:85020805-85049255	88.6653	109.541	75.2136	80.5928	64.505	51.1072	61.578	56.6192	88.5032	58.4524	-0.598468	0.00991984
XLOC_000410	Kif21b	chr1:138027977-138074591	4.22211	2.69494	3.57998	4.17471	3.02193	2.14026	2.90346	1.63165	3.66793	2.42433	-0.597385	0.0424461
XLOC_021701	Gm6981	chr9:51810165-51896843	1.48611	2.14594	2.45447	2.0206	1.13904	0.974221	1.63416	1.61323	2.02678	1.34016	-0.596781	0.0396445
XLOC_005564	Zfp874b	chr13:67572448-67585189	2.02965	3.07936	2.5235	2.81125	1.60703	1.7109	1.54734	2.04094	2.61094	1.72655	-0.596675	0.0122752
XLOC_021546	Jam3	chr9:26904968-26963006	12.1638	11.4803	9.01647	12.038	8.69939	7.72557	7.45198	5.68359	11.1746	7.39013	-0.596557	0.00785391
XLOC_022465	Armcx3	chrX:131291106-131295995	2.64607	3.57001	3.84997	2.71485	2.2006	2.68393	1.67844	1.90899	3.19523	2.11799	-0.593222	0.0276375
XLOC_021062	Rcn2	chr9:55889651-55906890	17.9032	20.9343	15.3121	20.6837	12.8036	15.0423	12.2788	9.6158	18.7083	12.4351	-0.589259	0.0110367
XLOC_019783	Lsm1	chr8:26896062-26914447	11.4196	15.266	11.6359	9.82623	8.37849	9.62678	7.30077	6.69792	12.0369	8.00099	-0.589217	0.0221309
XLOC_013179	Maml3	chr3:51491534-51908928	4.0072	2.98138	3.21937	3.49984	3.23953	2.51982	1.74509	1.6292	3.42695	2.28341	-0.585734	0.0391443
XLOC_014345	Tstd3	chr4:21684528-21694358	3.90852	5.71894	4.42463	3.52279	2.28558	3.78652	2.78326	2.85748	4.39372	2.92821	-0.585424	0.0427995
XLOC_021816	Tex9	chr9:72286335-72339766	5.81615	8.06603	5.76819	6.77248	4.69495	4.51611	3.20926	5.19077	6.60571	4.40277	-0.585302	0.0182171
XLOC_013731	Dnajb5	chr4:42965965-42971604	2.95624	3.15541	3.01294	3.54469	2.64042	1.84855	2.71951	1.24447	3.16732	2.11324	-0.583808	0.0305097
XLOC_006444	Fzd3	chr14:65811277-65881300	4.2205	3.59625	3.68775	5.01673	2.96702	2.91462	2.33366	2.83548	4.13031	2.7627	-0.580173	0.00864765
XLOC_001131	Pbx1	chr1:170049494-170362389	14.3825	14.6444	14.5536	15.6819	10.1039	10.3805	9.00958	10.182	14.8156	9.919	-0.578851	2.61034e-05
XLOC_011856	Chn1	chr2:73434582-73613403	4.14331	4.36262	4.48332	5.91493	2.54404	3.13247	2.69043	4.29102	4.72604	3.16449	-0.57866	0.0325813
XLOC_003548	6330403K07Rik	chr11:70845442-70847119	1.83904	1.87007	1.75764	1.21562	1.36773	0.863227	0.827204	1.41807	1.67059	1.11906	-0.578075	0.0466052
XLOC_000123	Spats2l	chr1:57831704-58005241	1.19261	1.32206	1.40387	1.39727	0.594739	1.14641	1.17779	0.643124	1.32895	0.890516	-0.577577	0.0374425
XLOC_008854	Metrn	chr17:25931515-25933990	19.0792	14.589	16.1975	13.5453	14.1698	10.5992	9.03357	8.69032	15.8528	10.6232	-0.577512	0.0237895
XLOC_014550	Psip1	chr4:83101584-83132294	85.4254	104.565	96.9053	128.785	63.5062	77.3049	46.6344	91.2756	103.92	69.6803	-0.576654	0.0414319
XLOC_005008	Smim13	chr13:41345212-41371946	6.41803	8.03928	8.39518	8.42659	4.85639	5.62145	4.69928	5.84263	7.81977	5.25494	-0.573453	0.00352434
XLOC_006082	Zbtbd6	chr14:79851641-79854623	1.38357	1.6139	1.12203	1.1421	0.958684	0.73035	0.710136	1.13829	1.3154	0.884365	-0.572788	0.0313415
XLOC_022773	Fgf13	chrX:56315327-56387613	2.04689	1.57936	2.70026	2.18694	1.53139	1.67338	1.19366	1.32691	2.12836	1.43133	-0.572383	0.033575
XLOC_014331	Fam92a	chr4:12080868-12099162	12.7263	17.1503	12.0126	13.8195	7.79994	11.6607	9.27372	8.73626	13.9272	9.36766	-0.572143	0.0174853
XLOC_003523	2810408A11Rik	chr11:69710859-69714488	2.12944	2.4494	2.04061	2.56802	1.08011	1.17998	1.74529	2.17513	2.29687	1.54513	-0.571942	0.0388233
XLOC_012571	Tbl1xr1	chr3:21975573-22115516	12.5222	13.7783	15.5726	20.8967	9.47125	10.2388	10.147	12.3965	15.6925	10.5634	-0.570998	0.0390669
XLOC_022776	Atp11c	chrX:57476466-57657156	6.36094	10.3457	7.71413	8.81066	3.99481	6.05524	5.30586	7.04985	8.30786	5.60144	-0.568679	0.0435113
XLOC_010838	Kif5c	chr2:49474833-49630298	6.83477	5.52217	7.42022	9.05382	6.24392	4.66397	4.26773	4.28549	7.20774	4.86528	-0.567026	0.035827
XLOC_003255	Grb10	chr11:11830501-11937423	106.968	110.254	116.673	102.496	87.136	66.3172	66.5627	74.6889	109.098	73.6762	-0.566351	0.000823114
XLOC_014629	Zfyve9	chr4:108311863-108454509	7.44465	10.0019	6.83657	8.11816	6.95891	5.46784	4.58124	4.89223	8.10032	5.47505	-0.565105	0.0229755
XLOC_023057	Sms	chrX:153881885-153929978	38.5516	37.6375	37.0543	48.1013	26.255	30.7456	21.9221	30.2221	40.3362	27.2862	-0.563903	0.00766571
XLOC_017552	Fam60a	chr6:148869580-148894954	134.462	145.691	154.976	172.903	107.481	110.924	93.5231	99.4302	152.008	102.84	-0.563752	0.00159487
XLOC_016178	Gtf2ird1	chr5:134833530-134932586	19.725	15.6424	25.0353	19.8784	17.3377	12.3641	13.5919	11.026	20.0703	13.5799	-0.563585	0.0330136
XLOC_001367	Fyn	chr10:39089604-39285180	7.21752	5.46245	6.89274	8.89027	4.48579	4.92058	4.74009	5.1529	7.11575	4.82484	-0.560534	0.0187899
XLOC_007593	Hspbap1	chr16:35770471-35828548	11.7853	10.5278	14.0047	12.9373	8.61127	10.4966	6.05576	8.24169	12.3138	8.35133	-0.560195	0.0151907
XLOC_007572	Tfrc	chr16:32608981-32632880	41.168	51.1244	45.0302	51.5805	30.0999	34.0212	30.1419	33.9443	47.2258	32.0518	-0.559168	0.00148356
XLOC_013779	Murc	chr4:48676385-48686364	2.9614	3.29602	3.51881	4.20366	2.67017	1.86941	1.87764	3.07155	3.49497	2.37219	-0.55906	0.0303565
XLOC_020425	Cep44	chr8:59010318-59029363	7.00061	10.938	10.2218	8.4078	6.46314	5.81094	6.12468	6.4326	9.14205	6.20784	-0.558427	0.017521
XLOC_014960	Slc25a33	chr4:149118144-149148376	17.8966	16.6084	16.8584	15.8176	14.8055	11.4581	12.1732	7.26833	16.7952	11.4263	-0.555697	0.0161011
XLOC_009799	Timm21	chr18:85104416-85150784	22.6984	32.1658	21.8236	26.9218	15.7429	18.0073	17.2475	19.5092	25.9024	17.6267	-0.555321	0.0160007
XLOC_021046	Slc35f2	chr9:53619341-53665968	16.3601	15.3708	18.2557	19.888	11.8329	12.3569	11.0682	12.296	17.4687	11.8885	-0.555201	0.00178198
XLOC_004565	Hbp1	chr12:32339733-32635400	15.3002	24.647	24.5597	20.7218	11.2458	12.805	18.2165	15.7991	21.3072	14.5166	-0.553636	0.0452751
XLOC_007764	Nmral1	chr16:4711317-4719059	25.4099	23.7503	23.5318	23.1644	20.0648	17.5906	14.0106	13.702	23.9641	16.342	-0.55229	0.00313049
XLOC_017203	Pole4	chr6:82596705-82602859	19.3985	24.3656	23.7811	21.3596	13.1272	18.6644	14.256	14.624	22.2262	15.1679	-0.55124	0.0054415
XLOC_020140	Zfp821	chr8:112229448-112248832	7.48418	7.06786	4.99021	5.87414	5.6968	3.32548	4.13192	4.19177	6.3541	4.33649	-0.551159	0.0366445
XLOC_009188	Twsg1	chr17:66272404-66300527	18.5831	21.118	23.9665	22.723	14.9664	14.5731	14.3969	15.1044	21.5976	14.7602	-0.549162	0.00112408
XLOC_015251	Tmem165	chr5:76612904-76638269	46.2819	55.6661	47.3246	41.1232	30.8975	35.0367	42.8291	21.5766	47.599	32.585	-0.546723	0.0309607
XLOC_012287	Tasp1	chr2:139659215-139892521	6.26964	6.71718	5.54184	6.20525	3.90142	5.10337	2.89557	5.03391	6.18348	4.23357	-0.546545	0.0149229
XLOC_022574	Ctps2	chrX:159339491-159472473	4.74005	5.89203	7.75353	6.24898	3.92128	4.84516	4.03607	4.06752	6.15865	4.21751	-0.546223	0.0253929
XLOC_016626	Slc4a5	chr6:83187368-83254939	0.995734	1.0432	1.20689	1.10365	0.639729	0.714763	0.677222	0.949758	1.08737	0.745368	-0.544816	0.00634288
XLOC_017214	Tet3	chr6:83312367-83391672	13.0741	9.18975	10.9467	10.7575	6.71209	8.02139	9.21973	6.19734	10.992	7.53764	-0.544271	0.0164918
XLOC_004562	Bcap29	chr12:32280218-32319523	3.73139	4.49377	3.2203	3.10611	2.29394	2.87881	2.48457	2.32372	3.63789	2.49526	-0.543913	0.0158702
XLOC_009377	Pcdha1	chr18:37089938-38001526	6.42584	4.61312	4.40874	5.60462	3.23691	4.28027	3.28846	3.65003	5.26308	3.61392	-0.542344	0.0201191
XLOC_012450	Zmynd8	chr2:165609651-165710251	41.7064	31.1831	40.2062	54.5908	30.7217	28.4038	25.4231	30.6849	41.9216	28.8084	-0.541206	0.0388968
XLOC_010373	Cep78	chr19:16030262-16059479	18.7841	16.988	18.8844	19.7361	14.1634	11.7235	13.9254	11.3177	18.5981	12.7825	-0.540989	0.000796551
XLOC_006226	Dph3	chr14:32893747-32898851	13.1088	18.3662	14.0229	11.0276	9.33817	10.83	8.63868	10.0472	14.1314	9.71351	-0.540837	0.0338972
XLOC_000396	Kdm5b	chr1:136456754-136529455	58.8385	48.2567	64.2749	75.8066	50.664	40.6725	38.5669	40.0625	61.7942	42.4915	-0.540297	0.0229962
XLOC_002582	Hist3h2ba	chr11:58762412-58763032	36.2697	33.1587	41.7283	36.4827	25.6739	25.8701	26.9304	23.0525	36.9098	25.3817	-0.540216	0.00106621
XLOC_021495	Zfp266	chr9:20299512-20325863	38.8545	45.6634	44.9918	52.4069	31.605	31.1801	28.63	33.6835	45.4792	31.2747	-0.540212	0.00299924
XLOC_017470	Magohb	chr6:131234406-131243262	13.4686	19.7843	17.8649	11.9243	10.572	11.0862	10.6925	11.0163	15.7605	10.8418	-0.539718	0.0371041
XLOC_022583	Fancb	chrX:161418523-161435204	5.86987	7.12162	6.81676	6.03324	3.6086	4.66504	5.23606	4.28829	6.46037	4.4495	-0.537975	0.00451338
XLOC_020126	Has3	chr8:109394141-109406802	2.68953	2.51773	2.34436	3.24039	2.14607	1.61026	1.90903	1.76999	2.698	1.85884	-0.537491	0.00970657
XLOC_012100	Prrg4	chr2:104670897-104690007	7.72138	8.27763	11.0463	9.65495	5.62763	6.72552	4.8296	8.12078	9.17507	6.32588	-0.536452	0.0327141
XLOC_015910	Uba6	chr5:86539753-86601768	21.1688	36.6991	29.5221	32.8901	16.2962	21.8016	19.6346	25.2025	30.07	20.7337	-0.536347	0.0494008
XLOC_022584	Gemin8	chrX:162608411-162628444	3.66085	3.12349	2.23523	3.15232	2.21841	2.19923	1.6753	2.30347	3.04297	2.0991	-0.535709	0.0284433
XLOC_001412	Asf1a	chr10:53257129-53350245	21.3173	29.8602	26.3042	24.7655	18.1142	19.7708	15.4265	17.3212	25.5618	17.6582	-0.533653	0.00732522
XLOC_022812	BC023829	chrX:67713230-67730218	13.8657	17.6724	12.5398	12.8347	9.30969	9.08578	11.6539	9.27621	14.2281	9.8314	-0.53328	0.0163168
XLOC_011794	Orc4	chr2:48669628-48804787	16.5553	27.9908	20.729	22.5486	12.7002	16.6286	16.2684	15.0987	21.9559	15.174	-0.533011	0.0365668
XLOC_015058	Fam185a	chr5:20930720-20987942	9.3025	9.75455	11.5114	9.23872	7.75908	6.09042	7.27638	6.43787	9.95179	6.89094	-0.530256	0.00342273
XLOC_001866	Pex7	chr10:19579895-19627480	9.62647	13.0022	11.9384	11.5998	7.9131	8.17944	9.35943	6.56781	11.5417	8.00494	-0.527895	0.00804223
XLOC_001636	Nup37	chr10:87609736-87641140	33.1585	46.4631	35.7077	34.9771	22.522	30.7787	24.3406	26.6707	37.5766	26.078	-0.527001	0.0166766
XLOC_007421	Cluap1	chr16:3909008-3941147	7.83267	6.71246	5.06183	7.01808	5.26463	4.72743	4.57579	3.91195	6.65626	4.61995	-0.526835	0.0196244
XLOC_005604	Ankrd32	chr13:77182348-77274729	6.91295	8.20802	7.73561	9.78953	4.55541	6.55926	5.55535	5.99133	8.16153	5.66534	-0.526677	0.0148455
XLOC_006154	Thoc7	chr14:14781527-14793739	51.2342	56.7633	48.9076	48.3751	33.7406	38.5104	37.0957	33.1577	51.3201	35.6261	-0.526588	0.000502474
XLOC_016148	Cdk2ap1	chr5:124795447-124804637	237.375	172.848	173.612	224.924	186.061	132.778	117.01	125.944	202.19	140.448	-0.525671	0.0361538
XLOC_002708	Eno3	chr11:70470677-70476015	6.51576	5.33146	4.68023	5.61481	4.84942	3.33942	2.50414	4.69445	5.53557	3.84686	-0.52505	0.0472321
XLOC_015945	G3bp2	chr5:92481171-92512761	127.228	126.314	149.734	174.821	103.709	102.571	84.1889	111.453	144.524	100.48	-0.524396	0.0139384
XLOC_021106	Anp32a	chr9:62189149-62226609	129.551	136.887	111.342	136.014	81.4719	89.8416	58.9332	126.984	128.448	89.3077	-0.524334	0.0434606
XLOC_021208	Bckdhb	chr9:83842387-84017847	18.2586	17.0979	24.861	23.909	11.5539	16.1018	15.5488	15.3499	21.0316	14.6386	-0.522783	0.028029
XLOC_019821	Efha2	chr8:41393404-41471658	2.88506	3.86645	3.35009	4.69203	1.89291	2.68412	2.66876	3.05717	3.69841	2.57574	-0.521917	0.0496954
XLOC_016004	Zfp644	chr5:107045759-107125849	21.107	28.7469	27.0421	31.0632	15.5966	19.698	17.3624	22.5377	26.9898	18.7987	-0.521783	0.0199383
XLOC_006659	Ebag9	chr15:44451186-44472572	9.01017	12.7377	11.396	13.5917	6.69339	9.00177	7.50569	9.40794	11.6839	8.1522	-0.51926	0.0245584
XLOC_017557	D7Ertd143e	chr7:3218784-3221016	11.069	15.7115	12.1246	12.8509	11.5989	6.11104	9.46942	8.96092	12.939	9.03507	-0.518118	0.0409708
XLOC_013275	Kirrel	chr3:86882513-86978669	5.42758	5.29405	5.15427	5.34045	4.11305	2.90388	4.18684	3.62278	5.30409	3.70664	-0.516994	0.00181365
XLOC_013778	Tmeff1	chr4:48598064-48676003	35.5934	49.3255	42.7153	46.8327	31.7107	32.323	31.6657	26.2531	43.6167	30.4881	-0.516634	0.00750407
XLOC_000751	Gls	chr1:52220293-52290076	23.1168	27.4619	22.5837	26.348	16.8856	20.7089	18.4246	13.5828	24.8776	17.4005	-0.515721	0.00795504
XLOC_014625	Zyg11b	chr4:107900359-107973695	8.85162	12.1681	11.2188	13.4644	8.14223	8.55088	7.73004	7.55348	11.4257	7.99416	-0.515268	0.0138758
XLOC_002461	Rnf145	chr11:44332465-44379022	40.9938	36.6542	36.7886	45.0036	33.1706	25.6731	25.2036	27.5271	39.8601	27.8936	-0.515009	0.00442801
XLOC_003041	Rundc3a	chr11:102254716-102264253	2.72767	2.66585	2.87627	2.24936	2.49244	1.9562	1.34727	1.57156	2.62979	1.84187	-0.513777	0.0323885
XLOC_004120	Mboat2	chr12:25516463-25645164	7.28571	7.82692	6.89777	9.23222	6.02007	5.93668	4.59059	5.35323	7.81066	5.47514	-0.512547	0.00855167
XLOC_004681	Erh	chr12:81735009-81744848	221.968	297.428	253.178	223.628	169.401	194.289	182.285	152.384	249.05	174.59	-0.512469	0.00939141
XLOC_001961	D630037F22Rik	chr10:55734099-55948495	1.85643	2.16074	2.06094	2.45852	1.10124	1.5222	1.52266	1.83828	2.13416	1.49609	-0.512465	0.017487
XLOC_011200	Dtwd1	chr2:125977876-125991013	9.41258	9.82496	10.5283	10.8214	6.6728	6.41101	9.69449	5.68445	10.1468	7.11569	-0.511951	0.0181412
XLOC_009222	Prkd3	chr17:79348744-79420156	13.6967	14.7122	14.4137	18.5537	11.0171	10.5282	10.1415	11.3623	15.3441	10.7623	-0.511699	0.00651418
XLOC_020617	4931428F04Rik	chr8:107800346-107813428	3.72616	2.73063	3.18246	3.01893	2.88523	1.9815	1.91709	2.09629	3.16455	2.22003	-0.511421	0.0217839
XLOC_022305	Zfp275	chrX:70587958-70604419	13.0593	12.2302	11.6346	12.1389	9.32508	9.15545	8.4538	7.48809	12.2658	8.60561	-0.511287	0.000374992
XLOC_006834	Fam19a5	chr15:87374728-87589794	5.82791	4.99372	5.52499	5.5191	5.31289	3.59195	3.90248	2.54733	5.46643	3.83866	-0.509995	0.0341854
XLOC_001505	Sumo3	chr10:77068978-77081076	57.6912	68.3846	56.7684	50.5604	35.6064	40.6523	39.023	48.9036	58.3512	41.0463	-0.507508	0.00986993
XLOC_017554	Amn1	chr6:149106098-149137234	4.44658	3.73437	4.54086	6.14531	3.46018	3.91004	2.79945	3.10721	4.71678	3.31922	-0.506958	0.0474474
XLOC_012083	Ldlrad3	chr2:101790357-102026534	10.5649	11.674	12.7208	15.1924	8.85967	9.77529	7.41425	9.28296	12.538	8.83304	-0.505328	0.0157365
XLOC_009518	Mex3c	chr18:73732358-73752232	30.4829	28.5521	29.6994	30.4342	26.5429	20.6487	21.8351	14.9839	29.7921	21.0027	-0.504361	0.0109038
XLOC_004144	Twistnb	chr12:34114488-34124245	23.0287	34.607	27.9886	32.5153	18.6775	22.6513	19.8479	22.1568	29.5349	20.8334	-0.503524	0.0191425
XLOC_009758	4930503L19Rik	chr18:70612793-70632134	8.72216	9.9922	8.98415	11.0241	5.88701	8.33884	7.91132	5.18764	9.68065	6.8312	-0.502965	0.0219437
XLOC_003441	Cops3	chr11:59623581-59653269	57.8116	82.1806	61.5246	60.5818	42.2061	44.8399	47.0108	51.0455	65.5246	46.2756	-0.501787	0.0173232
XLOC_021748	Cd276	chr9:58372106-58388747	22.8249	16.1639	23.9207	22.0617	17.8701	14.7447	10.2491	17.1515	21.2428	15.0038	-0.501641	0.0432927
XLOC_009750	Cep76	chr18:67777050-67800990	9.28401	12.2996	10.1413	10.8878	7.13868	7.19147	6.29699	9.48003	10.6532	7.52679	-0.501177	0.0155468
XLOC_005196	Fam169a	chr13:97837241-97907881	29.9968	32.1133	37.1019	44.0336	21.7027	25.0966	24.9748	29.4411	35.8114	25.3038	-0.501065	0.0239384
XLOC_016715	Trnt1	chr6:106719131-106750081	27.2563	40.554	34.514	37.2615	21.5403	27.548	22.3057	27.2381	34.8965	24.658	-0.501023	0.0196927
XLOC_003772	Fbxl20	chr11:97943867-98010930	3.10838	2.86851	2.5114	3.51435	2.13508	1.96167	2.52378	1.86758	3.00066	2.12203	-0.499837	0.0138568
XLOC_012581	Eif5a2	chr3:28680232-28697768	5.43097	8.13397	6.31912	6.97835	3.75834	5.86151	4.5909	4.78838	6.7156	4.74978	-0.499655	0.0333105
XLOC_019256	Inppl1	chr7:108966826-108986740	31.2378	23.7289	25.4651	27.4978	25.8776	14.7495	20.5028	15.2136	26.9824	19.0859	-0.499513	0.0422747
XLOC_012906	Trim33	chr3:103083215-103162691	18.8349	18.3164	24.4061	29.1376	16.8694	16.639	14.88	15.7816	22.6737	16.0425	-0.499124	0.0433195
XLOC_016357	St7	chr6:17699215-17893022	1.7096	1.65479	1.57462	1.52212	1.0182	1.2758	0.984728	1.29351	1.61528	1.14306	-0.498886	0.00215819
XLOC_002777	Rnmtl1	chr11:76057237-76064124	7.79142	10.6088	7.68625	10.4525	6.66203	7.12667	7.2518	4.83328	9.13474	6.46844	-0.497945	0.0348561
XLOC_002525	Cdkn2aipnl	chr11:51781132-51790838	32.5911	35.8677	31.7672	35.5963	22.4137	21.8891	22.8386	29.0629	33.9556	24.0511	-0.497547	0.00243359
XLOC_019134	Det1	chr7:85972359-85992097	5.68593	5.14548	5.45941	6.06928	4.40819	4.02675	3.96093	3.44404	5.59002	3.95998	-0.497363	0.00108095
XLOC_021759	Lrrc49	chr9:60435043-60535941	3.43188	3.90488	2.64832	2.86814	2.00728	2.38119	2.17743	2.53978	3.21331	2.27642	-0.497291	0.0223055
XLOC_012383	5430405H02Rik	chr2:156665812-156688681	16.5664	13.3983	15.9618	19.9368	14.2298	12.3419	11.4051	8.68856	16.4658	11.6663	-0.497123	0.0351837
XLOC_022887	Pdk3	chrX:91009954-91077434	16.3511	14.0766	14.9602	15.6519	11.7465	12.9781	9.50523	9.02589	15.2599	10.8139	-0.496859	0.00553951
XLOC_013447	A130049A11Rik	chr3:103718042-103811414	4.43762	5.36456	6.05273	5.88587	3.60428	4.24835	3.76067	3.80348	5.4352	3.8542	-0.495902	0.00660084
XLOC_001258	Syt14	chr1:194723500-194861892	5.58378	5.39497	4.51332	6.3162	3.37435	4.61888	3.85065	3.62375	5.45207	3.86691	-0.495623	0.0134374
XLOC_009353	Snhg4	chr18:35713063-35717970	21.007	19.2584	20.4296	25.4817	12.7554	12.7256	15.6523	19.9903	21.5442	15.2809	-0.495568	0.0287388
XLOC_000895	4933400F21Rik	chr1:91351385-91791857	2.52917	1.6685	2.05989	1.9352	1.49394	1.58075	1.20917	1.52987	2.04819	1.45343	-0.494885	0.0240199
XLOC_003262	Etaa1	chr11:17838751-17853878	12.1273	19.8378	14.5776	18.2985	10.5297	12.0336	10.0388	13.4402	16.2103	11.5106	-0.493951	0.0494622
XLOC_020444	Tma16	chr8:69000244-69010406	33.3106	42.204	27.6954	39.9214	24.1251	25.7592	23.8543	27.9014	35.7829	25.41	-0.493872	0.0229838
XLOC_007475	Yars2	chr16:16303057-16309733	34.694	34.9566	34.3197	31.7372	30.6918	21.1066	27.8212	16.7604	33.9269	24.095	-0.493695	0.023233
XLOC_000777	Orc2	chr1:58519614-58561953	30.0285	46.8383	36.1037	35.4623	24.1397	28.1399	23.1902	29.9535	37.1082	26.3558	-0.493616	0.0320162
XLOC_010568	Sephs1	chr2:4802609-4831602	31.7657	32.824	36.1115	40.7646	25.36	25.225	22.4505	27.4454	35.3665	25.1202	-0.493532	0.0040274
XLOC_013077	Zranb2	chr3:157197360-157211303	43.8191	53.6338	51.3902	51.4061	32.6732	38.9851	33.9383	36.6378	50.0623	35.5586	-0.493526	0.00132256
XLOC_009512	Rnmt	chr18:68460008-68484506	19.5835	21.0088	19.0973	20.0972	13.0407	16.1545	14.0057	13.5121	19.9467	14.1782	-0.492471	0.000360065
XLOC_000147	Abi2	chr1:60466462-60538007	27.7254	30.9078	31.4448	37.681	22.972	21.3014	23.4981	23.0854	31.9398	22.7142	-0.491757	0.00500873
XLOC_015368	Mtf2	chr5:108494692-108538238	30.3315	48.5901	41.4064	45.0784	25.7989	32.3373	27.9353	31.5631	41.3516	29.4087	-0.491703	0.0305946
XLOC_012544	Stmn2	chr3:8509526-8561604	5.52548	5.81649	4.6098	5.5413	2.2242	4.92639	3.98808	4.15039	5.37327	3.82226	-0.491372	0.0485804
XLOC_013919	Ssbp3	chr4:106584074-106722299	52.8039	46	51.1944	53.1321	46.1152	33.6349	33.0761	31.8003	50.7826	36.1566	-0.490074	0.0077592
XLOC_021444	Aasdhppt	chr9:4294792-4309494	20.6803	27.3324	24.6132	22.9543	14.9343	17.7591	18.0087	17.4078	23.8951	17.0275	-0.488847	0.00469586
XLOC_001398	Hace1	chr10:45297634-45432151	6.1587	8.2996	6.57252	7.80299	5.3418	4.84549	4.24707	6.15133	7.20845	5.14642	-0.48612	0.018714
XLOC_013160	Ankrd50	chr3:38348182-38383738	9.43479	7.89637	10.9494	11.2551	6.5987	6.67277	6.99428	7.98074	9.88392	7.06162	-0.485083	0.0149157
XLOC_010078	Ccnj	chr19:40905768-40923060	9.04838	6.62231	7.03597	9.18758	6.27867	5.91729	5.36616	5.24081	7.97356	5.70073	-0.484077	0.0185059
XLOC_009356	Matr3	chr18:35721811-35751699	94.4861	141.217	110.722	119.707	74.6571	91.9623	79.3733	88.2988	116.533	83.5729	-0.479632	0.0202754
XLOC_011117	Aven	chr2:112333120-112471410	16.7569	14.9392	18.0925	15.0368	13.2967	12.1322	10.7118	10.3498	16.2064	11.6226	-0.479623	0.00402172
XLOC_021210	Tpbg	chr9:85735986-85740662	7.20754	8.53463	8.1804	9.69977	6.64945	6.65715	5.97139	4.83803	8.40559	6.029	-0.479428	0.0120756
XLOC_013525	Ptbp2	chr3:119421659-119486306	30.7559	49.6337	40.6063	47.7036	28.0915	31.5619	26.4958	35.0235	42.1749	30.2932	-0.477391	0.0440009
XLOC_008354	Srsf3	chr17:29169604-29180317	243.638	346.966	272.578	279.135	181.397	220.835	189.969	228.385	285.579	205.147	-0.477237	0.0173147
XLOC_014455	Tex10	chr4:48292673-48486294	48.8933	75.7489	64.6621	62.9302	38.5804	48.4266	45.4935	48.741	63.0586	45.3104	-0.476852	0.0252453
XLOC_003711	Stxbp4	chr11:90337806-90499422	5.02891	4.1485	4.01602	5.36337	3.24796	3.11374	2.84181	4.13656	4.6392	3.33502	-0.476182	0.0235963
XLOC_001108	BC055324	chr1:165860194-165924912	22.9232	27.9209	27.621	24.9987	18.6008	18.8312	17.894	19.0783	25.8659	18.6011	-0.475668	0.000950608
XLOC_002063	2610008E11Rik	chr10:78527118-78560345	4.49694	6.40028	5.43506	5.91767	3.11892	3.5119	4.51724	4.86119	5.56249	4.00231	-0.474896	0.0355212
XLOC_005223	Ercc8	chr13:108948931-108985175	9.17824	9.26278	8.21698	8.75375	6.59324	6.11096	6.63509	6.15504	8.85294	6.37358	-0.474052	0.000108808
XLOC_005975	Zmym2	chr14:57506631-57581416	24.3923	32.8322	33.9479	35.3846	19.5646	21.9606	23.1716	26.4903	31.6392	22.7968	-0.472886	0.0213705
XLOC_000945	Dsel	chr1:113755278-113761495	2.43227	2.8092	2.49162	2.34092	1.6098	1.98776	1.62414	2.0684	2.5185	1.82252	-0.466628	0.0044366
XLOC_014125	Stmn1	chr4:134024234-134029758	159.145	140.024	108.862	136.725	112.997	96.3573	86.9917	98.2505	136.189	98.6491	-0.465232	0.0182477
XLOC_002303	Gdf11	chr10:128321601-128328774	1.42923	1.72702	1.41414	2.11595	1.33952	1.2759	1.21971	1.01797	1.67158	1.21328	-0.46231	0.0427132
XLOC_020491	Bst2	chr8:74058160-74061336	37.0635	41.6014	46.3714	30.9016	36.6798	25.6043	25.3159	25.6532	38.9845	28.3133	-0.46142	0.0484049
XLOC_019521	1700008J07Rik	chr7:134653951-134656383	3.66692	4.20176	4.76489	4.67273	2.66204	3.33983	3.06002	3.50927	4.32658	3.14279	-0.46118	0.00912614
XLOC_001283	Nup43	chr10:7387301-7398684	51.0235	73.6958	55.3252	46.8258	43.9139	37.9134	39.7209	43.2518	56.7176	41.2	-0.461152	0.0436015
XLOC_004634	L2hgdh	chr12:70791422-70825861	13.1745	13.886	13.7507	13.4157	10.117	9.54581	9.67663	10.0896	13.5567	9.85726	-0.45975	2.57917e-06
XLOC_010068	Hells	chr19:39005479-39042767	87.787	114.988	101.109	127.785	63.5881	81.2725	73.249	95.9071	107.917	78.5042	-0.459084	0.037057
XLOC_009558	Tmx3	chr18:90679545-90712659	15.9109	22.7184	20.6617	20.6405	10.6634	15.0279	17.0375	15.4513	19.9829	14.545	-0.458238	0.0337705
XLOC_014515	Wdr31	chr4:62114767-62131906	7.05347	7.48246	6.49602	6.40985	5.71981	3.45205	5.23684	5.56942	6.86045	4.99453	-0.457954	0.0183652
XLOC_022937	Zdhhc15	chrX:101732308-101866403	5.00164	8.35558	6.88877	6.55713	4.10343	5.10796	4.92419	5.38454	6.70078	4.88003	-0.457439	0.0493594
XLOC_014839	Tmem57	chr4:134358675-134409260	18.9633	17.5911	18.886	22.9105	13.6653	15.8857	12.575	14.9741	19.5877	14.275	-0.456457	0.00797302
XLOC_019850	Dctd	chr8:49184445-49227021	31.304	26.0565	29.1431	32.8438	17.5195	20.8852	20.374	28.2809	29.8369	21.7649	-0.455092	0.0252383
XLOC_020278	Ankrd10	chr8:11611582-11635754	49.5861	41.3676	40.4446	44.4911	43.3111	29.5302	28.935	26.5453	43.9724	32.0804	-0.454905	0.0332314
XLOC_005543	Cdc14b	chr13:64293852-64376296	14.5428	16.7096	17.4955	21.272	11.5117	11.303	13.691	14.6162	17.505	12.7805	-0.453824	0.0269138
XLOC_008657	Ttc27	chr17:75117089-75262910	22.7857	24.7314	22.7525	25.4476	15.1741	19.3496	14.2975	21.0858	23.9293	17.4767	-0.453341	0.0107571
XLOC_003357	Rufy1	chr11:50202804-50244613	6.63198	7.00354	6.79628	6.92919	5.59085	5.55067	4.24467	4.60203	6.84025	4.99705	-0.45297	0.00186113
XLOC_004540	Ywhaq	chr12:21396189-21423297	247.734	299.619	258.061	249.7	215.151	195.137	219.829	141.121	263.779	192.809	-0.452151	0.0172004
XLOC_000750	Myo1b	chr1:51806609-51972818	15.2407	16.618	15.6654	18.9567	12.6434	13.3329	8.71495	13.9042	16.6202	12.1489	-0.452117	0.0208299
XLOC_009436	Tnfaip8	chr18:50139080-50252883	6.16594	7.534	8.1491	7.44124	5.17912	4.51557	6.00586	5.71176	7.32257	5.35308	-0.451982	0.00986906
XLOC_006547	Tgds	chr14:118511132-118531987	6.76569	8.14432	8.37531	9.2177	5.29047	6.73768	5.81277	5.92192	8.12575	5.94071	-0.451867	0.0100588
XLOC_004170	Ap4s1	chr12:52709527-52839926	14.3181	14.5915	14.5174	16.264	9.78061	10.3162	11.1081	12.4415	14.9228	10.9116	-0.45165	0.00155711
XLOC_012853	Anp32e	chr3:95733179-95751310	105.831	98.3732	99.7677	109.222	75.8324	82.7894	60.6328	83.1303	103.298	75.5962	-0.450433	0.00320691
XLOC_023020	Amot	chrX:141880966-141921589	267.009	351.739	344.936	297.729	212.328	226.618	269.636	214.734	315.353	230.829	-0.450144	0.0127226
XLOC_002131	Nfyb	chr10:82211444-82226886	30.1701	38.7159	34.7621	40.3496	25.1763	29.0672	20.8456	30.3331	35.9994	26.3556	-0.449867	0.0213344
XLOC_014579	Caap1	chr4:94166769-94223487	14.8116	15.6141	15.5855	17.7546	9.37558	12.2412	10.9563	14.1339	15.9414	11.6767	-0.449145	0.011554
XLOC_009893	Wdr74	chr19:8810328-8815114	60.8561	63.4952	55.5932	52.3913	42.1338	42.1598	41.3341	44.586	58.084	42.5534	-0.448864	0.00100037
XLOC_015232	Guf1	chr5:69948180-69964869	7.33522	9.18507	7.64243	9.72923	5.32025	6.86021	5.76164	6.89104	8.47299	6.20829	-0.448676	0.0182167
XLOC_008928	Zfp799	chr17:32954148-32967193	5.75178	6.29281	7.51525	7.7856	4.99764	5.04947	5.00328	4.98639	6.83636	5.0092	-0.44865	0.00941519
XLOC_005419	Elovl2	chr13:41277750-41315772	4.85792	4.49896	4.54692	5.6102	2.84471	3.77579	4.26336	3.44439	4.8785	3.58206	-0.445647	0.0164457
XLOC_011354	Asxl1	chr2:153171874-153229743	31.1208	27.398	35.1258	41.1805	28.0563	21.3539	24.155	25.4526	33.7063	24.7545	-0.445329	0.0335371
XLOC_008247	Zfp760	chr17:21844707-21862603	3.77617	5.09668	4.2116	4.8555	3.28413	3.24823	2.90019	3.74774	4.48499	3.29507	-0.444794	0.0141256
XLOC_000747	Slc39a10	chr1:46864388-46910354	27.0444	38.0374	31.9129	38.9834	21.1072	28.8107	20.6661	29.3245	33.9945	24.9771	-0.444695	0.0490117
XLOC_016651	1600020E01Rik	chr6:86477323-86514443	4.97219	7.66445	6.90833	5.81023	5.15673	4.796	3.82063	4.87772	6.3388	4.66277	-0.443022	0.0443843
XLOC_018072	Ttc23	chr7:74792295-74871462	9.97435	10.1629	10.5491	12.7499	8.43072	7.02479	7.80801	8.73212	10.8591	7.99891	-0.441024	0.00853259
XLOC_000481	Mettl18	chr1:165925075-165927374	4.66128	6.11604	6.40152	5.50705	4.1529	5.08785	3.97296	3.50429	5.67147	4.1795	-0.440393	0.0261427
XLOC_009263	Mettl4	chr17:95126419-95149232	13.6067	16.823	15.9127	16.5518	11.7764	11.527	10.5714	12.533	15.7235	11.602	-0.43856	0.00262192
XLOC_002410	Xpo1	chr11:23156040-23197597	139.459	203.323	176.22	189.708	112.371	145.088	125.782	140.007	177.178	130.812	-0.437701	0.024849
XLOC_019169	Btbd1	chr7:88936959-88974317	18.3035	24.7252	19.8106	22.8586	13.7012	17.9477	16.9782	14.6667	21.4245	15.8234	-0.437196	0.0188262
XLOC_021350	Smarcc1	chr9:110034527-110142682	87.6934	75.1677	84.9152	101.901	71.4995	65.8328	54.4632	66.7751	87.4193	64.6427	-0.435466	0.0136188
XLOC_006857	Pphln1	chr15:93228780-93322343	57.1181	52.4366	55.0414	69.8538	51.0898	45.4566	33.7648	43.1713	58.6125	43.3706	-0.43449	0.0280013
XLOC_014270	A430005L14Rik	chr4:153331345-153336033	38.7323	38.8424	32.8318	25.5232	27.8589	27.0683	24.3831	21.3218	33.9824	25.158	-0.43377	0.0443342
XLOC_003319	Mat2b	chr11:40492815-40508705	25.2034	27.8073	27.3913	28.2603	23.7469	20.842	20.4689	15.4172	27.1656	20.1187	-0.433239	0.00904437
XLOC_017188	Mat2a	chr6:72382792-72390609	133.822	156.603	166.987	169.428	104.683	119.173	119.725	121.077	156.71	116.165	-0.431928	0.00405098
XLOC_017639	Zfp606	chr7:13063653-13081584	8.75977	10.0171	9.75893	9.42712	6.50199	6.72978	8.14619	6.7732	9.49073	7.03779	-0.431397	0.0018252
XLOC_015899	Ppat	chr5:77342273-77396531	58.6113	67.157	68.9204	72.4708	45.7042	44.513	49.9792	58.12	66.7899	49.5791	-0.429897	0.00679146
XLOC_008125	Psmg1	chr16:96201541-96212510	56.1092	63.5822	44.3677	46.5375	40.853	42.1614	39.6952	33.7056	52.6491	39.1038	-0.429101	0.0308584
XLOC_005890	Ap5m1	chr14:49631818-49707398	8.75703	12.5068	12.0421	14.1627	8.39756	10.2061	8.2793	8.38199	11.8672	8.81624	-0.428739	0.0469444
XLOC_013207	Dhx36	chr3:62272563-62310910	27.5937	26.4987	36.1145	38.6161	22.0993	26.5739	22.6289	24.4086	32.2057	23.9277	-0.428638	0.0411476
XLOC_013416	Bcl9	chr3:97007584-97031287	15.2004	12.1168	13.7922	14.4458	12.8051	10.4322	8.72492	9.32592	13.8888	10.322	-0.428195	0.0185806
XLOC_006758	H1f0	chr15:78858641-78860930	69.3904	79.3763	66.7353	57.9262	52.8927	52.1138	57.3481	40.9437	68.3571	50.8246	-0.427564	0.0207061
XLOC_013116	Armc1	chr3:19032143-19063065	32.2647	43.0179	39.4959	41.3725	26.0582	31.2178	31.047	27.8047	39.0378	29.0319	-0.42723	0.00978962
XLOC_014754	Zmym1	chr4:126724337-126738376	13.2819	20.0114	18.8451	19.6946	12.4591	13.2351	13.5808	14.1666	17.9582	13.3604	-0.426684	0.0294956
XLOC_014767	S100pbp	chr4:128828068-128866726	12.9062	15.548	16.9451	20.1216	11.1788	13.4472	10.5336	13.5956	16.3802	12.1888	-0.426399	0.048096
XLOC_020271	Lig4	chr8:9970019-9976323	5.59548	7.64696	7.69733	7.32343	5.19822	5.76259	4.44943	5.6395	7.0658	5.26243	-0.425122	0.0207196
XLOC_001091	Prdx6	chr1:163170242-163181297	93.2185	85.6686	88.4311	97.3438	77.5057	63.2445	60.6289	70.2157	91.1655	67.8987	-0.425104	0.00227745
XLOC_009212	Memo1	chr17:74600039-74694203	41.4609	48.3186	37.7505	37.0613	34.3225	35.7878	27.5394	25.0465	41.1478	30.6741	-0.423798	0.0287278
XLOC_014328	Esrp1	chr4:11259184-11313930	22.1726	21.8988	22.3801	29.3832	19.6728	17.6812	14.0788	20.0128	23.9587	17.8614	-0.423703	0.0359988
XLOC_013227	Ift80	chr3:68696420-68808492	6.50757	8.5761	8.30025	9.97162	5.27065	6.00969	6.68051	6.92125	8.33889	6.22053	-0.422818	0.038543
XLOC_002890	Srsf1	chr11:87860874-87867259	133.242	163.418	160.946	197.027	117.744	127.024	111.645	132.156	163.658	122.142	-0.422124	0.0240401
XLOC_018366	BC030336	chr7:127821133-127878368	7.63048	6.64639	6.31314	8.49593	6.04402	5.05341	4.8878	5.72612	7.27149	5.42784	-0.421872	0.0172472
XLOC_021451	Yap1	chr9:7932000-8004596	65.6914	52.6351	61.7199	68.0414	54.2928	43.4141	48.0311	39.4808	62.022	46.3047	-0.42162	0.014874
XLOC_007689	Cxadr	chr16:78301915-78360030	20.39	20.6381	24.0881	24.3761	15.8306	18.2281	15.0253	17.7987	22.3731	16.7207	-0.42013	0.00524516
XLOC_006080	Mtrf1	chr14:79797578-79823457	5.04215	5.25755	4.16878	5.5663	3.60255	3.41424	4.11809	3.84333	5.0087	3.74455	-0.419641	0.00942238
XLOC_021207	Ttk	chr9:83728295-83765997	21.7937	32.8803	28.1107	30.41	19.0968	21.1593	20.3146	24.0725	28.2987	21.1608	-0.41934	0.033598
XLOC_002246	Lemd3	chr10:120360466-120416386	9.12495	8.73368	11.1508	12.0622	8.43069	7.83009	7.82602	6.63428	10.2679	7.68027	-0.418913	0.0262903
XLOC_003912	Limd2	chr11:106017569-106021456	21.1773	22.3749	20.1632	18.9041	19.2336	14.3709	13.315	14.8964	20.6549	15.454	-0.418504	0.0132261
XLOC_002426	Mtif2	chr11:29426456-29445255	12.0203	15.2909	12.6511	17.3344	10.8564	9.86629	10.6887	11.4944	14.3242	10.7264	-0.41728	0.0301218
XLOC_000572	Desi2	chr1:180117547-180182728	21.277	26.2113	24.4591	26.9699	18.5906	17.791	20.3298	17.3935	24.7293	18.5262	-0.416654	0.0047699
XLOC_007575	Fyttd1	chr16:32877869-32909049	23.7886	29.3938	26.7484	25.7175	14.7432	24.8667	21.3313	18.2786	26.4121	19.805	-0.415337	0.0359431
XLOC_016971	B630005N14Rik	chr6:13575674-13627966	10.7032	13.9734	10.7392	13.1481	8.78465	9.96508	8.97503	8.69168	12.141	9.10411	-0.415294	0.0140572
XLOC_009228	Hnrpll	chr17:80428826-80461674	54.5345	60.5036	66.6073	66.0558	55.8041	46.7141	43.0994	40.1937	61.9253	46.4528	-0.414763	0.0127162
XLOC_007681	Robo1	chr16:72663393-73046345	9.5249	7.61833	8.99818	10.4275	6.95856	7.76655	5.28548	7.43303	9.14223	6.8609	-0.414147	0.0298323
XLOC_021667	Pafah1b2	chr9:45773393-45792954	30.4933	29.0508	31.917	34.9707	23.9697	24.1689	21.1984	25.5536	31.608	23.7226	-0.414022	0.00231616
XLOC_004996	Cdyl	chr13:35751730-35965933	15.176	13.8918	14.5591	16.017	12.051	11.9651	10.9821	9.76687	14.911	11.1913	-0.414001	0.00179536
XLOC_003330	Ublcp1	chr11:44268072-44284050	26.7073	29.4433	26.4569	28.4272	20.5339	17.9734	22.1949	22.6951	27.7587	20.8493	-0.412938	0.00166974
XLOC_001079	Rasal2	chr1:159065313-159350367	7.84442	10.069	8.43038	9.60502	7.67005	7.01909	6.15677	6.16063	8.9872	6.75164	-0.412636	0.0122211
XLOC_005782	Adk	chr14:21871795-22267791	70.9759	101.511	90.8343	85.79	68.0402	67.9514	65.9866	60.3107	87.2778	65.5722	-0.41253	0.0166458
XLOC_014137	Srsf10	chr4:135412006-135425814	87.8788	116.233	97.6145	125.464	67.3883	88.8458	72.8169	91.918	106.798	80.2423	-0.412445	0.04401
XLOC_004171	Nubpl	chr12:53198732-53411946	9.89319	11.2163	8.41747	9.49106	7.65284	7.57231	6.8618	7.23788	9.7545	7.33121	-0.412018	0.00711713
XLOC_000782	Tmem237	chr1:59157436-59176940	8.68056	10.458	9.19296	9.96585	5.71952	6.63969	8.99016	7.44973	9.57434	7.19977	-0.411222	0.0248356
XLOC_015965	Paqr3	chr5:97426707-97540615	4.54088	4.86169	3.7945	4.33753	3.60529	2.87219	3.58362	3.12599	4.38365	3.29677	-0.411078	0.00912427
XLOC_020079	Pdp2	chr8:107115367-107120749	5.26878	5.29448	4.95533	5.47149	3.66602	4.15019	3.24372	4.72731	5.24752	3.94681	-0.410949	0.00835295
XLOC_015743	Rheb	chr5:24308640-24348179	44.0252	64.3897	46.852	50.4185	34.462	43.5698	42.3905	34.2913	51.4213	38.6784	-0.410839	0.0484835
XLOC_021447	Dync2h1	chr9:6928502-7177046	6.06311	6.14046	7.29835	8.99073	5.40757	4.82033	5.54644	5.6671	7.12316	5.36036	-0.410188	0.0473754
XLOC_000161	Creb1	chr1:64579377-64651122	18.1068	21.5098	21.2239	22.5337	15.2435	17.5193	12.4211	17.6167	20.8436	15.7001	-0.408823	0.0160931
XLOC_004495	Ncapg2	chr12:117643874-117702004	16.7543	19.5179	20.8431	23.4627	13.6355	15.9073	16.5638	14.6361	20.1445	15.1857	-0.407675	0.018202
XLOC_012354	Cdk5rap1	chr2:154161121-154198455	6.68183	4.48653	6.24009	6.59621	4.70248	4.28807	3.88813	5.22514	6.00117	4.52595	-0.40702	0.0460321
XLOC_019209	Eed	chr7:97103163-97129486	35.1192	40.7301	35.9935	38.9055	30.1914	30.2921	25.5869	27.6397	37.6871	28.4275	-0.406781	0.00168813
XLOC_006281	Wdhd1	chr14:47860618-47896532	23.8971	23.7423	28.5492	27.1487	17.7973	18.8669	19.1096	22.2285	25.8343	19.5006	-0.405773	0.00609759
XLOC_013756	Polr1e	chr4:45031496-45046564	15.9152	18.7633	16.3854	16.7277	11.9597	12.9202	11.4975	14.8111	16.9479	12.7971	-0.405287	0.00510032
XLOC_021524	Rgl3	chr9:21775970-21793897	3.95984	3.38177	4.52871	3.97219	2.46116	3.31561	2.93352	3.25478	3.96063	2.99127	-0.404972	0.0191398
XLOC_015537	Gtf2ird2	chr5:134659907-134694013	1.88879	2.20528	1.60177	1.60237	1.35246	1.54463	1.43769	1.18032	1.82455	1.37878	-0.404156	0.0340265
XLOC_008675	Eml4	chr17:83750270-83879699	33.19	30.5074	34.1513	40.6926	24.543	24.7766	27.005	28.3827	34.6353	26.1768	-0.403954	0.0113624
XLOC_015124	Zfp512	chr5:31754808-31784126	16.5288	13.1053	14.3635	16.8207	13.5341	11.5696	11.5293	9.36058	15.2046	11.4984	-0.403073	0.023719
XLOC_006897	Atf1	chr15:100058289-100091679	35.6583	36.0301	35.5279	42.7013	27.4903	28.0969	27.8449	29.9505	37.4794	28.3457	-0.402971	0.00246288
XLOC_019947	1700030K09Rik	chr8:74967778-74999132	3.60513	4.63056	3.17306	3.36745	2.47591	2.70491	2.77539	3.2387	3.69405	2.79873	-0.400432	0.0481233
XLOC_011259	Mcm8	chr2:132642070-132669924	11.2702	14.953	12.7301	10.5124	8.56273	10.1862	9.08374	9.64749	12.3664	9.37004	-0.400301	0.027851
XLOC_006794	Xrcc6	chr15:81846798-81870514	30.8069	37.3385	35.8092	34.3873	23.5841	24.6163	24.0104	32.6142	34.5855	26.2063	-0.400255	0.0169842
XLOC_006633	Pop1	chr15:34425065-34460408	10.3745	14.0665	11.9518	12.6824	8.63492	8.76852	10.7977	9.00537	12.2688	9.30163	-0.399439	0.0179816
XLOC_021861	Snhg5	chr9:88415890-88417735	91.3555	111.119	83.4617	103.956	59.6877	76.4209	66.2934	93.2018	97.4731	73.9009	-0.39941	0.0490402
XLOC_004307	2310044G17Rik	chr12:88287992-88306314	12.6977	10.8397	10.8546	13.4095	10.1043	9.20673	8.2362	8.72935	11.9504	9.06915	-0.398017	0.00932579
XLOC_012084	Trim44	chr2:102140275-102241057	37.7748	36.088	34.7399	39.1835	29.1382	26.1135	27.3789	29.5343	36.9466	28.0412	-0.39789	0.000392381
XLOC_005552	Mterfd1	chr13:67013033-67133341	16.347	18.9156	19.2024	21.1208	13.806	17.2103	12.676	13.6809	18.8965	14.3433	-0.397738	0.0170389
XLOC_009990	D030056L22Rik	chr19:18787725-18792918	30.9558	40.1744	33.7342	28.2843	29.4292	27.5512	23.8346	20.3356	33.2872	25.2876	-0.396533	0.0491935
XLOC_010053	Btaf1	chr19:37000568-37088547	24.3356	32.1918	32.2909	35.617	19.1182	25.0859	22.6548	27.7894	31.1088	23.6621	-0.394747	0.0487703
XLOC_011128	Fam98b	chr2:117075474-117097276	24.6806	20.8675	27.3299	27.3268	19.6163	19.4599	17.1254	20.0253	25.0512	19.0567	-0.39458	0.0112805
XLOC_000130	Nif3l1	chr1:58504476-58519120	23.0306	28.2524	21.8708	20.2592	17.1391	18.8699	14.8651	20.2224	23.3533	17.7741	-0.393845	0.0364511
XLOC_022724	9530027J09Rik	chrX:45610110-45638603	9.02196	12.0043	12.3579	9.5055	7.28139	7.51205	8.85676	9.03394	10.7224	8.17103	-0.392039	0.0380744
XLOC_009602	Zfp191	chr18:24170767-24179272	18.9573	22.73	23.207	21.3551	15.3265	16.4401	16.3721	17.6402	21.5624	16.4447	-0.39089	0.00296937
XLOC_003377	Hspa4	chr11:53073315-53113981	185.065	179.96	190.69	222.784	148.624	148.608	136.323	160.299	194.625	148.463	-0.390587	0.00526271
XLOC_007962	Qtrtd1	chr16:43861525-43889789	14.8153	14.5639	15.5184	16.6338	13.4517	12.6238	10.5164	10.3537	15.3828	11.7364	-0.390333	0.00669179
XLOC_018930	Uba2	chr7:34925715-34953548	108.75	110.752	121.444	141.825	82.0324	100.605	85.0737	101.028	120.693	92.1848	-0.388739	0.0201567
XLOC_011778	Zbtb26	chr2:37287687-37298641	4.98528	4.45996	4.2785	5.10703	3.41702	3.61163	2.82006	4.53666	4.70769	3.59634	-0.38849	0.0345806
XLOC_004869	B3galnt2	chr13:14046940-14131867	12.2969	11.2862	13.0299	12.0015	10.752	8.60689	9.34628	8.44573	12.1536	9.28773	-0.38799	0.00413792
XLOC_008885	Taf11	chr17:28038072-28044669	25.1868	28.5611	27.2738	20.8395	22.3626	21.4549	16.9649	17.2396	25.4653	19.5055	-0.384652	0.0349376
XLOC_001014	Timm17a	chr1:137198111-137210314	79.8178	75.8913	73.8522	66.4931	56.5878	58.2727	63.6252	48.3521	74.0136	56.7095	-0.384201	0.00636943
XLOC_005380	2610307P16Rik	chr13:28551902-28977291	5.15886	5.49072	4.7633	5.52419	4.18079	3.76059	2.95381	5.15495	5.23427	4.01253	-0.383474	0.0473329
XLOC_010848	Fmnl2	chr2:52716901-52993236	18.9976	20.163	20.1491	25.2722	19.039	16.3158	13.0072	16.4854	21.1455	16.2118	-0.3833	0.0386064
XLOC_010928	Ube2e3	chr2:78709203-78760740	43.3611	36.9474	36.0741	39.2036	32.216	31.1877	32.0004	23.9708	38.8966	29.8437	-0.382215	0.0121827
XLOC_000454	Abl2	chr1:158488917-158579750	15.2383	13.5298	12.3001	17.0849	12.4457	11.1493	11.3178	9.71337	14.5383	11.1565	-0.381966	0.0287856
XLOC_017346	Zfp422	chr6:116574033-116578995	13.4449	12.4316	13.3438	14.5542	10.0825	10.9429	9.35586	10.8947	13.4436	10.319	-0.38162	0.00161565
XLOC_015712	Phtf2	chr5:20264481-20387942	8.11995	8.733	8.1797	10.3131	5.85691	7.5483	6.06469	7.69766	8.83644	6.79189	-0.379652	0.027048
XLOC_017872	Zfp383	chr7:30693535-30701832	4.27453	5.23971	4.39123	4.26534	3.06754	3.51802	4.11823	3.2739	4.5427	3.49442	-0.378497	0.0183209
XLOC_013381	Mllt11	chr3:95022465-95032599	3.27744	2.79003	3.86953	3.26146	2.50893	2.4146	2.68264	2.55638	3.29962	2.54064	-0.377107	0.0158253
XLOC_015126	Gpn1	chr5:31797133-31814000	23.9713	25.4009	25.0787	28.1978	23.2124	19.3605	18.894	17.5892	25.6622	19.764	-0.376767	0.00784816
XLOC_007511	Yeats2	chr16:20141135-20232646	24.6691	22.7876	26.932	27.8971	19.562	19.061	19.5404	20.6188	25.5714	19.6956	-0.376664	0.00265866
XLOC_003587	Pafah1b1	chr11:74487450-74537886	45.5637	54.9899	54.1113	59.2351	35.5162	45.9212	42.0217	41.344	53.475	41.2008	-0.376193	0.0139886
XLOC_007740	Ttc3	chr16:94580369-94690828	27.5578	34.5153	33.0278	39.3129	22.4878	25.6572	26.9715	28.5475	33.6034	25.916	-0.374766	0.0309826
XLOC_003888	Ccdc43	chr11:102546001-102559039	22.0698	29.8769	25.3718	24.5792	17.5971	22.5848	16.4542	21.9752	25.4744	19.6528	-0.374313	0.0407457
XLOC_007921	Umps	chr16:33955097-33967089	37.9807	38.3896	42.2286	42.688	31.8616	29.8944	29.3549	33.3355	40.3217	31.1116	-0.374105	0.000986991
XLOC_002163	Tmpo	chr10:90610315-90634327	142.656	125.85	153.501	163.962	122.666	107.927	125.013	96.7115	146.492	113.079	-0.373489	0.0190495
XLOC_006526	Dis3	chr14:99475852-99653712	39.0666	42.6766	46.9522	54.3001	32.8233	35.8305	32.3148	40.3176	45.7489	35.3216	-0.373188	0.032115
XLOC_007073	Fam49b	chr15:63760648-63892010	17.9296	21.6386	20.3899	23.3754	16.3571	18.0209	15.344	14.6302	20.8334	16.088	-0.372907	0.0130343
XLOC_017178	Kdm3a	chr6:71538965-71582899	13.2314	11.328	14.1598	14.6213	10.6138	8.8855	10.4286	11.3078	13.3351	10.3089	-0.371337	0.0144907
XLOC_016895	Strap	chr6:137683602-137700451	84.8948	101.796	112.987	118.236	73.304	89.9999	80.8237	79.0393	104.478	80.7917	-0.370926	0.0270602
XLOC_004629	Pole2	chr12:70302765-70329177	17.5769	20.2418	18.4077	20.4698	14.5915	15.1379	14.6981	14.9562	19.1741	14.8459	-0.369088	0.000923314
XLOC_013222	Ccnl1	chr3:65750072-65762147	23.1899	19.3811	23.7239	23.8447	19.7226	17.8498	16.6326	15.5958	22.5349	17.4502	-0.368917	0.0103563
XLOC_014769	Rbbp4	chr4:128964864-129012614	81.512	92.4457	87.8152	88.6899	66.2287	72.4098	59.3376	73.4527	87.6157	67.8572	-0.368688	0.00250666
XLOC_015649	Cdk8	chr5:147043250-147114450	34.7466	31.1607	32.505	40.0036	26.6267	24.941	25.1171	30.5631	34.604	26.812	-0.36806	0.0159127
XLOC_009331	Polr2d	chr18:31948812-31956355	58.1132	60.6563	55.6561	53.4172	48.5952	40.7444	44.4603	42.8935	56.9607	44.1733	-0.366791	0.00136414
XLOC_020127	Cirh1a	chr8:109417539-109446994	64.8182	61.2962	61.8736	81.1793	44.5563	50.3508	51.9853	61.9415	67.2918	52.2085	-0.366147	0.0437081
XLOC_021068	Ptpn9	chr9:56842774-56919773	10.9849	12.0404	12.5513	13.9768	11.1685	9.50009	10.4397	7.35035	12.3883	9.61466	-0.365676	0.0366485
XLOC_004340	Cpsf2	chr12:103214183-103244203	32.0499	39.9349	35.0141	42.1061	26.7064	31.3275	24.4473	33.2563	37.2763	28.9344	-0.365472	0.0343458
XLOC_015485	Bcl7a	chr5:123794456-123824092	12.7541	11.6316	9.12015	10.6943	10.3551	8.24253	7.97016	7.76697	11.05	8.58369	-0.364381	0.0445928
XLOC_001829	Mthfd1l	chr10:6179459-6373466	34.5298	30.1969	31.2653	35.8927	30.1917	21.1915	24.6632	26.406	32.9712	25.6131	-0.364323	0.0187005
XLOC_023059	Yy2	chrX:153985753-154036647	5.15768	6.46349	6.73828	6.38961	3.79821	5.73883	4.53369	5.16354	6.18727	4.80857	-0.363695	0.0447904
XLOC_001088	Dars2	chr1:162970743-163000763	13.7325	17.5621	18.479	14.8935	11.0031	12.3664	11.9604	14.9381	16.1668	12.567	-0.363392	0.0416308
XLOC_002039	Pcbp3	chr10:76224598-76424692	5.71357	5.02135	5.16648	4.97942	4.1733	4.24861	3.84992	3.9742	5.2202	4.06151	-0.362091	0.000943109
XLOC_001620	Ric8b	chr10:84380357-84481082	6.11026	6.37573	5.65467	6.84984	5.29231	5.0284	4.58938	4.53757	6.24763	4.86191	-0.361783	0.00413926
XLOC_018991	Prmt1	chr7:52232124-52241790	275.39	216.172	247.749	236.141	208.496	187.392	193.574	169.921	243.863	189.846	-0.361243	0.0104593
XLOC_002013	Tfam	chr10:70688224-70700792	26.6467	38.3374	29.479	30.6362	23.3083	27.073	21.7318	25.3312	31.2748	24.3611	-0.360424	0.0460773
XLOC_022472	Bhlhb9	chrX:132420389-132425620	12.4857	16.5247	16.5667	17.2684	10.6037	13.707	11.2648	13.3886	15.7114	12.241	-0.360085	0.040475
XLOC_005182	Homer1	chr13:94074449-94174917	19.2561	21.3817	20.9214	23.2289	13.6789	15.9718	16.2411	20.1798	21.197	16.5179	-0.359832	0.0250624
XLOC_019428	Btbd10	chr7:120459157-120512853	6.43347	8.8044	7.39502	7.21602	5.11786	5.25792	6.16069	6.72683	7.46223	5.81583	-0.359622	0.0386148
XLOC_022554	2210013O21Rik	chrX:150158096-150175839	8.1885	7.44233	8.13552	5.95197	6.36541	6.47157	4.70152	5.63494	7.42958	5.79336	-0.35888	0.0484015
XLOC_017874	Zfp260	chr7:30880094-30892633	14.9304	19.719	14.0633	15.188	12.2674	11.3226	12.5034	13.7509	15.9752	12.4611	-0.358403	0.0421585
XLOC_003261	Pno1	chr11:17103202-17111592	67.129	94.7723	72.6997	73.8916	54.3226	64.3084	55.1678	67.0502	77.1231	60.2122	-0.357107	0.048827
XLOC_017912	Ankrd27	chr7:36371265-36424256	21.1179	21.6077	24.5544	25.4286	19.8389	17.4603	18.4072	16.6811	23.1772	18.0969	-0.356963	0.0069965
XLOC_022336	Tbl1x	chrX:74756565-74905604	33.9982	32.5925	34.4526	42.3924	29.0176	28.7057	23.5484	30.7291	35.8589	28.0002	-0.356895	0.0270247
XLOC_004269	Dcaf4	chr12:84861415-84882942	18.9658	13.3282	16.8669	17.8356	14.9796	11.5702	13.0734	12.6921	16.7491	13.0788	-0.356853	0.0404724
XLOC_010762	Exosc2	chr2:31526256-31536827	36.5145	45.1307	33.6291	32.6633	30.6583	31.3724	26.5504	27.0052	36.9844	28.8966	-0.356018	0.039876
XLOC_010638	Arl5b	chr2:14976988-15000818	16.7609	20.0603	16.5945	20.6948	13.4573	15.9424	12.7907	15.7186	18.5276	14.4772	-0.35589	0.023168
XLOC_005687	Ipo11	chr13:107584518-107726995	33.5818	41.4406	42.3145	43.7424	30.5718	33.0414	33.9783	28.2833	40.2698	31.4687	-0.355782	0.0151254
XLOC_005961	Gmpr2	chr14:56291071-56297588	17.9059	19.4565	15.5877	17.3182	16.0453	13.9561	13.1604	11.757	17.5671	13.7297	-0.355574	0.0186809
XLOC_006392	Cenpj	chr14:57145597-57190683	8.0333	8.16357	9.06334	10.2788	5.74009	7.83441	6.87623	7.33592	8.88475	6.94666	-0.355012	0.0298856
XLOC_001699	Bbs10	chr10:110735734-110738792	2.5016	2.33179	2.83892	2.72565	2.09229	2.20251	2.11046	1.73267	2.59949	2.03448	-0.353567	0.0103349
XLOC_020011	Dhps	chr8:87595655-87604645	33.4141	28.0964	29.3661	32.0548	20.1756	26.7702	25.0493	24.2506	30.7328	24.0614	-0.353059	0.0113625
XLOC_000961	Ddx18	chr1:123450411-123464557	86.0635	99.328	90.8256	95.1506	74.036	76.7231	59.6975	80.3401	92.8419	72.6992	-0.352837	0.00930425
XLOC_016435	Agk	chr6:40275476-40346761	8.55939	11.0097	10.6118	11.6051	8.16135	8.58643	7.06606	8.92291	10.4465	8.18419	-0.352108	0.0266537
XLOC_000176	Xrcc5	chr1:72353994-72441527	38.5115	49.5557	37.5959	46.4885	28.3227	35.3851	37.1617	34.0517	43.0379	33.7303	-0.351563	0.038172
XLOC_020563	Siah1a	chr8:89247836-89270959	13.2236	11.9796	13.1001	13.4298	10.4395	11.1998	10.3908	8.63832	12.9333	10.1671	-0.347179	0.00469096
XLOC_011765	Rbm18	chr2:35971598-36045803	13.3031	16.562	15.2159	15.0205	10.4637	12.9656	12.463	11.3917	15.0254	11.821	-0.346049	0.0103656
XLOC_013319	Cks1b	chr3:89219393-89222213	93.4331	109.452	98.5081	76.2195	77.8535	67.3452	73.9937	78.1552	94.4032	74.3369	-0.344757	0.034428
XLOC_018068	Lins	chr7:73834774-73862142	3.28615	3.22065	3.65015	3.82431	2.761	3.16192	2.06296	3.02474	3.49532	2.75265	-0.344599	0.0399106
XLOC_003277	Ahsa2	chr11:23206894-23397946	18.8789	21.5571	20.5828	22.2954	14.7461	17.5923	15.907	17.3782	20.8285	16.4059	-0.344348	0.00437086
XLOC_010052	Tnks2	chr19:36908721-36967967	116.245	131.445	133.093	142.661	95.8521	97.637	125.765	93.179	130.861	103.108	-0.343875	0.0251819
XLOC_009670	Lars	chr18:42362002-42421725	50.498	57.4542	56.2289	57.0673	42.6124	44.7763	43.2216	43.7488	55.3121	43.5898	-0.343605	0.000442761
XLOC_003643	5730455P16Rik	chr11:80173993-80191517	3.30918	3.26416	3.83034	4.08533	2.6605	3.02363	2.67079	3.07458	3.62225	2.85738	-0.342197	0.0157691
XLOC_022231	Utp14a	chrX:45610110-45638603	23.1802	29.5534	27.4871	26.5566	20.2758	23.5154	17.7078	22.7573	26.6943	21.0641	-0.341749	0.0236424
XLOC_012297	Snx5	chr2:144075858-144096638	159.86	201.073	167.503	177.115	124.563	150.335	136.364	145.764	176.388	139.257	-0.341006	0.0128415
XLOC_005681	Trappc13	chr13:104932232-104968546	23.2088	30.6055	26.7087	24.2893	17.3851	20.9568	20.8293	23.661	26.2031	20.7081	-0.339544	0.0386904
XLOC_011537	Lsm14b	chr2:179759691-179770166	28.433	20.6506	29.1932	27.616	23.6653	20.5629	20.1852	19.3066	26.4732	20.93	-0.33896	0.044216
XLOC_004225	Ppm1a	chr12:73862197-73895927	38.2333	41.2184	41.0377	43.2297	33.7252	31.9553	37.1992	26.627	40.9298	32.3767	-0.338196	0.0125626
XLOC_016993	Pot1a	chr6:25693734-25759226	10.8408	13.4706	12.1521	12.5059	7.24747	10.5331	9.80018	11.1695	12.2423	9.68756	-0.337675	0.0458799
XLOC_004863	Heatr1	chr13:12487641-12531160	46.0837	45.9565	55.8475	56.8532	43.332	42.3928	34.9133	41.4823	51.1852	40.5301	-0.336734	0.023894
XLOC_013025	Trmt10a	chr3:137806501-137822784	6.96654	8.58358	6.49152	8.23529	5.93346	6.19599	5.84757	5.99729	7.56923	5.99358	-0.33673	0.0206202
XLOC_010181	Slc18a2	chr19:59335367-59370502	3.02157	3.58474	2.82807	3.50712	2.39934	2.35601	2.50256	2.99246	3.23538	2.56259	-0.336329	0.0288978
XLOC_017177	Rmnd5a	chr6:71338627-71390631	30.7917	29.4452	33.1798	39.4851	27.6074	27.0185	26.6375	24.0071	33.2254	26.3176	-0.336259	0.026508
XLOC_016710	Ppp4r2	chr6:100783631-100818711	50.1055	58.728	58.3195	65.7473	43.0131	49.3148	42.3858	49.8023	58.2251	46.129	-0.335967	0.0183103
XLOC_000755	1700019D03Rik	chr1:52981970-53009684	14.5754	17.3735	18.7061	17.5915	15.7267	12.6599	13.7226	12.0439	17.0616	13.5383	-0.333711	0.0255377
XLOC_013906	Mier1	chr4:102787069-102838354	20.7237	26.4577	22.3836	24.6526	16.1678	19.4816	18.7738	20.3774	23.5544	18.7002	-0.332947	0.0203221
XLOC_021913	Cdv3	chr9:103255431-103268110	194.307	198.146	198.694	205.481	171.07	161.592	151.987	148.319	199.157	158.242	-0.331774	0.000339792
XLOC_003509	Senp3	chr11:69486611-69495586	79.5375	69.3707	77.9417	61.7518	67.2223	53.5983	60.294	48.1967	72.1504	57.3278	-0.331772	0.04395
XLOC_001210	H3f3a	chr1:182732698-182743734	400.883	460.756	379.832	362.393	341.992	328.979	327.206	276.626	400.966	318.701	-0.331277	0.0189295
XLOC_012912	Rsbn1	chr3:103718042-103811414	6.70875	8.95729	8.12118	9.40288	6.83714	6.83058	6.1125	6.60253	8.29753	6.59569	-0.331158	0.0328137
XLOC_008624	Trip10	chr17:57388873-57403120	32.4674	30.4837	29.0538	31.8948	29.8044	24.4047	21.8528	22.4434	30.9749	24.6263	-0.330899	0.0178839
XLOC_010880	Bbs5	chr2:69485311-69505626	4.85264	5.4657	5.55689	5.50506	3.44471	4.5937	4.7181	4.27068	5.34507	4.2568	-0.328441	0.0166263
XLOC_004861	Dip2c	chr13:9275770-9668172	4.86842	4.43643	4.9317	6.16137	4.25746	4.24828	3.85497	3.88422	5.09948	4.06123	-0.328433	0.0363607
XLOC_018156	Nars2	chr7:104100036-104213267	6.34517	7.4432	7.56974	6.57871	5.65306	6.31044	5.05241	5.23831	6.98421	5.56355	-0.328089	0.0139804
XLOC_007952	Poglut1	chr16:38525263-38550266	18.1585	18.6263	22.1731	18.1031	15.7227	16.3537	15.3679	14.001	19.2653	15.3613	-0.326698	0.0118822
XLOC_003787	Smarce1	chr11:99070361-99092331	64.2564	57.0201	50.4011	57.8209	49.5437	47.8388	38.0635	47.6738	57.3746	45.7799	-0.325697	0.0236461
XLOC_004507	Cenpo	chr12:4133396-4240123	5.25505	5.33595	4.84793	5.15866	4.77543	4.12621	3.60659	3.92909	5.1494	4.10933	-0.3255	0.00825335
XLOC_001128	Uck2	chr1:169156216-169215258	97.6856	81.161	91.598	91.847	69.5504	72.1979	64.2258	83.5036	90.5729	72.3694	-0.323699	0.0141565
XLOC_000233	Cab39	chr1:87690021-87748152	42.0481	47.3109	41.0303	40.1689	35.1246	36.9506	34.6819	29.5524	42.6395	34.0774	-0.323378	0.00901199
XLOC_012221	Gabpb1	chr2:126454642-126502073	23.777	24.741	23.4122	26.108	21.4799	18.842	17.2556	20.7801	24.5096	19.5894	-0.323271	0.00481857
XLOC_016737	Fancd2	chr6:113481675-113546279	12.5064	12.86	13.8823	15.6752	11.4177	10.5045	11.8626	10.1184	13.731	10.9758	-0.323108	0.0149613
XLOC_009509	Seh1l	chr18:67934529-67959597	57.9496	64.0881	64.6754	74.884	53.106	52.6423	48.0028	55.4322	65.3993	52.2958	-0.322579	0.0142429
XLOC_019954	Hmgxb4	chr8:77517601-77555871	13.7738	16.5291	17.0304	16.6583	11.3352	13.9666	10.8472	15.0368	15.9979	12.7965	-0.322139	0.0440434
XLOC_001623	Pwp1	chr10:85334575-85351848	47.6601	64.2466	54.3228	46.5598	39.5196	44.2662	40.6957	45.7328	53.1973	42.5536	-0.322073	0.0487989
XLOC_015242	Dancr	chr5:74489107-74490361	9.17129	10.9757	7.71128	10.3605	7.99596	7.0064	7.52834	8.05614	9.55469	7.64671	-0.32137	0.045829
XLOC_010107	Hif1an	chr19:44637343-44650764	14.6236	13.834	15.9407	13.0954	12.0551	11.9331	13.2927	8.74447	14.3734	11.5063	-0.320975	0.046343
XLOC_015974	Hnrpdl	chr5:100462597-100468241	94.2988	106.531	105.471	112.52	83.6644	84.9228	73.6484	93.2216	104.705	83.8643	-0.320204	0.00926917
XLOC_021883	Rnf7	chr9:96371375-96379014	69.1317	85.4014	62.5765	65.3386	58.4705	56.3373	55.0686	56.3824	70.612	56.5647	-0.320012	0.0344846
XLOC_021537	Dpy19l1	chr9:24216224-24307584	24.4341	23.7362	26.0966	32.2731	21.8649	22.496	22.1492	18.9017	26.635	21.3529	-0.318888	0.0464816
XLOC_021240	Atr	chr9:95755836-95852063	11.8414	15.3851	15.0815	15.7494	9.95245	12.1626	13.0057	11.4253	14.5144	11.6365	-0.318821	0.0410502
XLOC_002003	Ado	chr10:67007258-67011703	22.6086	22.315	20.7098	23.6129	19.9678	18.7634	18.3715	14.4971	22.3116	17.9	-0.317837	0.0159764
XLOC_014949	Tardbp	chr4:147976652-148001105	71.6606	89.3984	73.6054	77.2648	62.1949	69.2048	53.2754	65.5851	77.9823	62.565	-0.31779	0.0258899
XLOC_020518	Smarca5	chr8:83223842-83263358	84.8096	104.928	92.887	108.343	72.2387	84.6637	71.4797	85.3721	97.7419	78.4385	-0.317414	0.0270284
XLOC_005006	Pak1ip1	chr13:41096378-41108402	54.7363	55.8512	52.8053	55.7152	51.8495	42.3469	45.4036	36.4501	54.777	44.0125	-0.315656	0.0168211
XLOC_009774	8030462N17Rik	chr18:77872019-77952749	22.71	21.7915	22.4966	24.4838	19.2393	18.5278	17.721	18.1221	22.8705	18.4026	-0.313581	0.000498235
XLOC_006309	Osgep	chr14:51535048-51544568	20.1888	20.2013	18.2153	16.8909	16.8728	15.5235	13.6243	14.7527	18.8741	15.1933	-0.312968	0.0131804
XLOC_013429	Wdr3	chr3:99689339-99966326	33.2036	45.6686	42.7324	44.0807	29.7013	36.5418	31.6033	35.5925	41.4213	33.3597	-0.312266	0.0472619
XLOC_002527	Ppp2ca	chr11:51912325-51936251	171.328	215.15	194.502	200.131	143.945	159.887	182.389	142.969	195.278	157.298	-0.312032	0.0261929
XLOC_015256	Paics	chr5:77342273-77396531	218.54	270.968	236.451	231.339	205.969	187.967	188.651	189.157	239.325	192.936	-0.310846	0.00835592
XLOC_006429	Ints6	chr14:63282503-63448963	13.8299	17.3913	16.7215	17.7613	11.7269	15.2327	11.8232	14.2386	16.426	13.2553	-0.309406	0.0445139
XLOC_010903	Cdca7	chr2:72314275-72324947	72.1307	60.487	70.333	76.6501	63.5848	59.5828	50.7729	51.7973	69.9002	56.4344	-0.30872	0.0263798
XLOC_007407	Cbx5	chr15:103021976-103070247	75.0694	78.9359	84.3077	101.374	62.3387	73.3494	66.5409	72.0742	84.9218	68.5758	-0.308435	0.0418202
XLOC_001364	Hdac2	chr10:36694349-36721694	81.2526	108.533	89.474	96.4572	67.7001	72.0617	76.3111	87.3633	93.9292	75.859	-0.308252	0.0448778
XLOC_017330	Sec13	chr6:113678045-113690675	71.3207	69.7324	64.3349	59.4335	55.3137	57.4766	55.5499	45.6022	66.2054	53.4856	-0.307798	0.0155381
XLOC_006305	Ccnb1ip1	chr14:51408923-51415403	15.8684	16.6523	13.4836	13.9846	14.1885	11.492	11.2707	11.5649	14.9972	12.129	-0.306232	0.0308229
XLOC_010835	Acvr2a	chr2:48669628-48804787	7.22541	9.51812	9.68075	10.0444	6.9382	7.44044	7.6502	7.47806	9.11717	7.37673	-0.305606	0.0383167
XLOC_004043	Alyref	chr11:120455829-120459679	141.588	146.632	129.701	124.695	130.732	109.066	106.519	93.0275	135.654	109.836	-0.304579	0.0323976
XLOC_000799	Plekhm3	chr1:64835694-65003398	2.35884	2.0509	2.4591	2.77436	1.77277	2.10282	1.8724	2.06111	2.4108	1.95227	-0.304356	0.0344293
XLOC_015527	Vkorc1l1	chr5:130417982-130458760	40.7161	41.6953	40.486	40.5326	34.6078	36.5169	34.0875	27.2834	40.8575	33.1239	-0.302728	0.00897479
XLOC_018880	Zfp146	chr7:30946286-30954746	31.7917	40.3381	35.7884	35.1866	28.7973	29.413	25.8198	32.0065	35.7762	29.0092	-0.302492	0.0205473
XLOC_015505	Zfp664	chr5:125343074-125369000	49.6255	46.9407	44.5655	52.7903	46.2267	40.1744	32.4354	38.5087	48.4805	39.3363	-0.301543	0.0339284
XLOC_006973	Tars	chr15:11313417-11329413	100.807	115.282	101.2	110.497	89.9547	83.059	81.5887	92.5527	106.947	86.7888	-0.301309	0.00395062
XLOC_003634	Wsb1	chr11:79052883-79068197	29.4026	29.0716	30.716	35.292	24.9949	26.7675	23.2635	26.0107	31.1206	25.2592	-0.301061	0.011209
XLOC_012902	Nras	chr3:102862207-102871837	34.5874	42.1915	43.4138	44.0691	31.9695	34.6103	31.2632	35.592	41.0654	33.3588	-0.29986	0.0191659
XLOC_013766	Ncbp1	chr4:46151382-46185274	72.4577	80.9403	76.7986	71.2956	61.6952	59.2189	57.6057	66.4196	75.373	61.2348	-0.299696	0.00288665
XLOC_021871	Morf4l1	chr9:89986506-90009658	118.393	150.85	132.146	131.59	104.075	104.39	101.872	122.678	133.245	108.254	-0.299662	0.0230602
XLOC_009632	Etf1	chr18:35062438-35091657	136.571	151.287	150.895	161.304	108.763	126.864	106.934	145.164	150.014	121.931	-0.299032	0.0343404
XLOC_013935	Orc1	chr4:108252058-108287436	23.5499	23.2352	27.955	29.3661	19.4748	22.6293	19.267	23.3059	26.0266	21.1692	-0.298014	0.0408351
XLOC_021560	Fam118b	chr9:35018787-35075365	17.2195	21.7156	19.3284	18.0173	16.2398	13.2665	14.4483	18.0906	19.0702	15.5113	-0.298	0.0485831
XLOC_006310	Tmem55b	chr14:51544623-51550524	49.9211	55.3411	55.4676	46.1302	47.0236	38.8638	45.7492	36.6383	51.715	42.0687	-0.297835	0.029988
XLOC_012599	Actl6a	chr3:32607467-32625893	82.6651	85.3343	86.2751	85.5632	71.5237	68.7219	64.1026	72.4095	84.9594	69.1894	-0.296222	0.000238872
XLOC_020092	Cbfb	chr8:107694573-107741888	37.9253	42.5505	42.714	44.3259	33.7166	37.4559	32.0537	33.3181	41.8789	34.1361	-0.294927	0.00511163
XLOC_021707	Cul5	chr9:53422686-53475612	18.7251	24.1622	22.135	25.6959	17.5856	18.934	17.5431	19.8989	22.6795	18.4904	-0.294616	0.0406065
XLOC_020024	Heatr3	chr8:90661783-90695842	37.6174	43.9272	40.8121	38.6937	32.7097	35.4006	35.0449	28.3444	40.2626	32.8749	-0.292454	0.0135313
XLOC_018464	Bccip	chr7:140901015-140968486	58.3484	69.8614	62.1554	63.1152	50.6996	46.7708	53.6396	55.9841	63.3701	51.7735	-0.291588	0.00979144
XLOC_020837	Ilf3	chr9:21172446-21216164	72.3813	68.6801	84.8302	87.6333	72.0082	60.9178	61.9411	61.4123	78.3812	64.0699	-0.290863	0.0364699
XLOC_007595	Kpna1	chr16:35983448-36036248	30.6974	33.1461	35.7846	35.5111	22.6105	31.6243	26.0491	30.3187	33.7848	27.6506	-0.289061	0.0417281
XLOC_020882	Rpusd4	chr9:35075465-35083542	13.1816	14.9731	15.7148	16.2557	11.4298	11.7416	14.6279	11.4163	15.0313	12.3039	-0.288854	0.0377583
XLOC_013516	Rtca	chr3:116191881-116211093	44.7696	46.6869	47.7109	42.9397	45.1123	34.9787	36.808	32.2042	45.5268	37.2758	-0.288476	0.0321656
XLOC_018164	Clns1a	chr7:104845166-104869303	35.276	34.4249	36.5329	32.9133	31.8967	31.0123	22.4012	28.8522	34.7868	28.5406	-0.285523	0.0334716
XLOC_014377	Aptx	chr4:40629110-40650220	2.52449	2.45218	2.80528	2.79041	1.85017	2.15196	2.24711	2.43364	2.64309	2.17072	-0.284052	0.0208116
XLOC_011579	Suv39h2	chr2:3341402-3392258	14.1794	14.2967	13.9567	18.2234	13.1598	13.1738	11.7205	11.7887	15.164	12.4607	-0.28327	0.0493702
XLOC_021397	Wdr48	chr9:119804012-119846676	16.6921	20.1791	18.7754	16.4758	14.243	14.9595	14.4877	15.5916	18.0306	14.8205	-0.282858	0.0137675
XLOC_005200	Ankra2	chr13:99033030-99044709	8.64377	9.66563	8.11654	8.81967	7.99471	6.55741	7.75063	6.67199	8.8114	7.24369	-0.282648	0.018332
XLOC_000433	Ivns1abp	chr1:153191627-153211575	101.952	116.176	101.731	130.147	83.3422	96.2169	88.6935	101.69	112.501	92.4857	-0.282643	0.0444465
XLOC_002403	Peli1	chr11:20991326-21050330	11.271	12.1925	11.6859	13.5655	10.8301	11.2718	8.14355	9.80437	12.1787	10.0125	-0.282567	0.0445336
XLOC_003365	Hnrnpab	chr11:51398258-51420383	438.365	365.621	423.148	443.632	377.457	359.356	311.854	324.949	417.692	343.404	-0.282531	0.0193267
XLOC_005168	Tmem161b	chr13:84361900-84435571	12.8636	16.3447	15.1746	14.141	10.0702	12.7026	12.4746	12.9103	14.631	12.0394	-0.281259	0.040302
XLOC_012999	Pla2g12a	chr3:129581539-129598739	15.1114	15.1218	13.1488	14.9491	11.0354	13.2548	11.0992	12.6256	14.5828	12.0037	-0.28078	0.0126283
XLOC_013185	Exosc8	chr3:54532600-54539286	51.4351	52.7884	53.2149	46.3608	40.4808	36.7309	49.6519	40.9152	50.9498	41.9447	-0.280588	0.029086
XLOC_020763	Msantd4	chr9:4383536-4386869	17.8583	22.0923	20.0265	20.3799	17.0094	16.0515	17.2171	15.884	20.0892	16.5405	-0.280421	0.0088916
XLOC_002235	Nup107	chr10:117187698-117229761	43.694	53.1013	48.9299	52.3734	38.7849	39.317	42.3593	42.6808	49.5247	40.7855	-0.28009	0.0102679
XLOC_020451	Zfp868	chr8:72134552-72149447	9.7836	13.1338	11.4916	11.2665	8.17821	9.49318	9.641	10.337	11.4189	9.41235	-0.278794	0.0501155
XLOC_006117	Gpr180	chr14:118536348-118563454	6.74989	8.20738	6.53024	7.98894	6.18962	6.13094	5.70694	6.27265	7.36911	6.07504	-0.278598	0.0268024
XLOC_018091	Fanci	chr7:86537223-86611159	9.81507	10.2879	8.9507	10.6069	7.79757	8.36168	8.38541	8.16061	9.91514	8.17632	-0.278182	0.00403673
XLOC_017287	Zfyve20	chr6:92136705-92164805	9.15093	9.11443	9.66804	9.61187	7.89776	7.55432	8.55748	6.97885	9.38632	7.7471	-0.276902	0.00394523
XLOC_016486	Cul1	chr6:47404322-47476138	76.2531	86.5455	89.1005	97.3412	65.3882	79.043	71.0859	72.8303	87.3101	72.0868	-0.276412	0.025909
XLOC_018034	Prmt3	chr7:57033727-57113635	37.4814	48.4019	44.3197	41.0275	37.5037	34.439	35.3836	34.2974	42.8076	35.4059	-0.273877	0.0231464
XLOC_003198	Drg1	chr11:3149924-3166389	70.4747	88.7373	76.6145	70.3758	61.5981	66.9003	61.4132	63.356	76.5506	63.3169	-0.273823	0.0259171
XLOC_014107	Rpa2	chr4:132324274-132334661	49.626	48.4063	51.3201	46.0718	44.6185	41.6637	40.5911	34.8582	48.856	40.4329	-0.273008	0.0110176
XLOC_014733	Akirin1	chr4:123412437-123427542	22.6193	22.4179	21.8454	20.1254	18.07	18.5184	17.3652	18.0675	21.752	18.0053	-0.272728	0.000886353
XLOC_002351	Morc2a	chr11:3549496-3590375	28.4034	23.7286	26.0517	29.8272	24.4093	22.8482	20.0829	22.0825	27.0027	22.3557	-0.272461	0.0280946
XLOC_007325	Kansl2	chr15:98349531-98364652	44.2309	39.1897	44.5118	46.4958	41.9499	36.0618	33.4922	33.0451	43.6071	36.1372	-0.271075	0.0272043
XLOC_013456	Ddx20	chr3:105481379-105490489	27.9135	30.9592	33.5005	32.0133	24.9423	25.3863	28.7177	24.1763	31.0966	25.8056	-0.269071	0.0142526
XLOC_022039	Zfp445	chr9:122758027-122775124	23.9206	24.8746	29.9179	30.2403	22.9337	23.4839	22.5071	21.5101	27.2384	22.6087	-0.268761	0.0348418
XLOC_003564	Emc6	chr11:72989004-72990544	47.6249	53.2992	46.87	44.0025	44.5562	41.2985	38.4878	34.9082	47.9491	39.8127	-0.268277	0.0281725
XLOC_005506	Golm1	chr13:59736356-59777145	33.2235	44.6106	36.8086	39.6627	31.7647	33.8314	29.6518	32.9608	38.5764	32.0522	-0.267294	0.0441144
XLOC_013323	Hax1	chr3:89799378-89802608	57.4522	67.6443	66.0524	50.4052	51.1115	50.2197	48.277	51.1787	60.3885	50.1967	-0.266681	0.0461599
XLOC_001052	Tsen15	chr1:154217865-154233812	40.6467	35.446	38.9773	33.6838	31.8837	35.0921	27.4373	29.3263	37.1885	30.9349	-0.265622	0.0346923
XLOC_009339	Wdr36	chr18:32823295-33026074	56.6925	65.3338	65.4506	69.5064	49.6766	56.0816	48.2608	59.8005	64.2458	53.4549	-0.265281	0.0303764
XLOC_004205	Arf6	chr12:70473136-70476967	50.8561	59.0142	54.3707	55.0795	47.0249	46.6124	50.849	38.0308	54.8301	45.6293	-0.265009	0.0276244
XLOC_016425	Ubn2	chr6:38383924-38462763	12.2916	11.603	12.1891	14.3533	10.4707	10.8331	8.93724	11.75	12.6092	10.4978	-0.264401	0.0455014
XLOC_000244	Cops7b	chr1:88483674-88503075	13.6652	13.8237	12.0184	13.2216	11.7585	11.8633	10.9039	9.38282	13.1822	10.9771	-0.264093	0.0202426
XLOC_005637	F2r	chr13:96371743-96388388	14.8094	12.2873	12.1907	13.7831	11.3296	12.5343	10.6255	9.71269	13.2676	11.0505	-0.263796	0.0430145
XLOC_014711	Ctps	chr4:120212472-120242881	51.2086	43.6444	48.0651	55.3178	46.2555	42.4082	36.2145	40.2396	49.559	41.2795	-0.263723	0.0431147
XLOC_020812	Zfp317	chr9:19426534-19454175	14.5248	15.9188	16.6537	16.8996	12.316	12.6209	14.1159	14.2956	15.9992	13.3371	-0.262557	0.0111365
XLOC_016517	Mpp6	chr6:50060239-50148597	42.9368	43.4451	43.313	52.3604	38.6791	41.7548	33.9125	37.4978	45.5138	37.9611	-0.261785	0.0357483
XLOC_017910	Cep89	chr7:36182111-36223703	11.2397	12.2972	11.2384	12.5068	9.53664	9.72552	10.4735	9.72125	11.8205	9.86423	-0.261016	0.00264086
XLOC_004758	Smek1	chr12:102277618-102327137	41.46	40.4695	42.7903	51.2281	38.4571	39.6035	32.9968	35.8648	43.987	36.7306	-0.260096	0.0445513
XLOC_014058	Clspn	chr4:126234223-126271147	17.9139	15.6365	15.6706	19.9419	15.453	14.5231	13.0887	14.6955	17.2907	14.4401	-0.25992	0.047035
XLOC_003846	Dnajc7	chr11:100444149-100481482	59.5344	55.5558	53.8651	57.5881	51.4233	39.8002	43.1871	54.8754	56.6358	47.3215	-0.25922	0.0461165
XLOC_001259	Diexf	chr1:194930596-194956445	7.47819	6.69911	8.60013	8.32564	6.69288	6.77375	6.01548	6.50727	7.77577	6.49734	-0.259135	0.0329004
XLOC_020351	Bag4	chr8:26875010-26895681	19.3286	17.6513	20.5986	22.1697	15.9423	16.153	15.9966	18.6225	19.937	16.6786	-0.257454	0.0305579
XLOC_021882	Atp1b3	chr9:96233094-96264718	68.5816	71.1796	69.2888	73.7609	58.044	63.7188	55.9048	59.0353	70.7027	59.1757	-0.25676	0.00123652
XLOC_010171	Atrnl1	chr19:57685523-58207830	10.7007	10.9488	11.2391	12.7627	9.43352	8.9055	10.7955	9.15956	11.4128	9.57352	-0.253535	0.0260376
XLOC_004576	Bzw2	chr12:36818421-36883412	98.8928	119.476	111.363	97.7058	77.0682	97.4482	91.5461	92.5649	106.859	89.6568	-0.253228	0.0451111
XLOC_012829	Mrpl9	chr3:94247257-94252630	35.22	42.221	35.3037	32.2468	33.0077	31.1119	29.255	28.2763	36.2479	30.4127	-0.253221	0.048204
XLOC_007807	Mzt2	chr16:15848533-15863415	15.326	13.6739	14.2397	11.6392	11.4714	11.8668	11.4168	11.3039	13.7197	11.5147	-0.252769	0.0305425
XLOC_019208	l7Rn6	chr7:97067198-97089695	54.5612	59.5156	46.4281	51.084	41.0776	40.7073	48.1345	47.7077	52.8972	44.4068	-0.252412	0.04816
XLOC_022129	Tspan7	chrX:10062241-10173730	27.6231	26.1271	29.3264	25.4451	23.2505	23.307	24.9711	19.5834	27.1304	22.778	-0.252271	0.0225002
XLOC_018796	Zfp109	chr7:25012813-25022617	3.31995	3.37315	3.43327	3.38592	3.10929	3.14436	2.35002	2.74665	3.37807	2.83758	-0.251539	0.0277819
XLOC_009089	Polr1c	chr17:46380868-46384994	89.7877	91.1708	86.9999	85.8148	73.3563	60.4491	87.3538	76.3758	88.4433	74.3838	-0.249765	0.0478023
XLOC_002408	Cct4	chr11:22890592-22903336	285.674	303.309	297.606	324.351	248.66	272.825	232.791	264.56	302.735	254.709	-0.249206	0.00709381
XLOC_015522	Cct6a	chr5:130293260-130322231	368.28	477.262	433.565	411.342	330.394	370.677	341.355	380.303	422.612	355.682	-0.248746	0.0398553
XLOC_003683	Ints2	chr11:86024184-86071070	21.3861	24.3816	25.4576	26.4697	20.2072	20.8989	18.8473	22.312	24.4238	20.5663	-0.247999	0.026112
XLOC_018065	Snrpa1	chr7:73205221-73219473	91.9164	79.4753	84.2572	87.865	84.5579	72.2947	67.6488	64.9854	85.8785	72.3717	-0.246871	0.0375249
XLOC_017222	Paip2b	chr6:83756052-83781735	19.5614	18.8001	19.8558	21.7695	18.3905	16.2049	15.8067	17.126	19.9967	16.882	-0.244274	0.0106948
XLOC_016695	Slc6a6	chr6:91634060-91709057	20.7954	15.9441	19.2796	19.686	14.8263	16.9144	16.1805	16.012	18.9263	15.9833	-0.243825	0.0404759
XLOC_020669	Rfwd3	chr8:113794843-113824122	48.5794	50.8964	54.9611	58.4826	42.5534	47.9446	45.8671	43.8669	53.2299	45.058	-0.240453	0.0167545
XLOC_000533	Dcaf8	chr1:174078145-174126524	26.1442	22.8974	26.5287	27.7492	20.827	19.6443	24.0714	22.9372	25.8299	21.87	-0.240089	0.0333285
XLOC_019687	Abhd13	chr8:9977716-9992154	11.187	12.8877	13.0342	13.1621	10.079	11.8967	11.3571	9.23322	12.5678	10.6415	-0.240024	0.044799
XLOC_004377	Vrk1	chr12:107248472-107315620	18.6062	19.9769	19.8338	20.9823	16.3453	17.3335	15.7326	17.8308	19.8498	16.8105	-0.239758	0.00422067
XLOC_017192	Kcmf1	chr6:72791107-72849973	29.4108	31.1495	28.5033	31.433	25.468	27.8862	23.7924	24.9039	30.1242	25.5126	-0.239709	0.0060568
XLOC_001006	Tmem183a	chr1:136242673-136258576	40.2576	47.9672	44.2496	46.0191	36.6188	37.2357	37.0007	40.3295	44.6234	37.7962	-0.239559	0.0102095
XLOC_005236	Dhx29	chr13:113718000-113759395	18.5836	19.7544	22.2927	22.592	18.8217	17.7888	15.5142	18.3691	20.8057	17.6235	-0.239481	0.0404135
XLOC_000946	Tsn	chr1:120195094-120207709	37.8018	37.9907	39.2825	39.7168	34.6455	36.5006	31.962	28.0487	38.6979	32.7892	-0.239036	0.0206047
XLOC_004527	Ddx1	chr12:13226112-13255980	97.391	109.975	108.391	116.299	83.2948	99.0361	85.3352	98.5606	108.014	91.5567	-0.238481	0.0288145
XLOC_011356	Mapre1	chr2:153567022-153599050	26.0257	30.396	29.6793	30.6973	21.8223	26.7619	24.0794	26.4986	29.1996	24.7905	-0.236157	0.0318301
XLOC_006711	Zfp41	chr15:75447114-75455725	9.92014	10.1271	9.57049	10.9307	9.22189	7.81896	8.77918	8.63668	10.1371	8.61418	-0.234861	0.0100279
XLOC_014297	Cpsf3l	chr4:155243675-155265871	30.4482	29.9917	26.6968	27.2311	27.278	22.8538	23.2431	23.814	28.592	24.2972	-0.234817	0.0213523
XLOC_014473	Ikbkap	chr4:56762551-56822477	30.4313	27.16	29.4312	29.896	26.3273	24.0715	26.0876	22.9112	29.2296	24.8494	-0.23422	0.0070082
XLOC_009104	Rpl7l1	chr17:46910855-46919605	57.7327	67.938	62.2537	58.7949	54.9245	52.3659	51.0497	51.6689	61.6798	52.5023	-0.232419	0.00957192
XLOC_000219	Mrpl44	chr1:79772592-79778020	20.727	18.7331	19.1422	18.6823	19.2	14.545	16.7312	15.3694	19.3211	16.4614	-0.231094	0.0440249
XLOC_017047	Braf	chr6:39553236-39675462	14.5594	15.31	16.0983	18.0486	12.8333	14.8899	12.7227	14.1175	16.0041	13.6408	-0.230506	0.0415684
XLOC_020864	Ncapd3	chr9:26837759-26902900	18.1943	20.8035	20.2768	21.0093	16.5052	16.709	15.7951	19.4237	20.071	17.1082	-0.230419	0.0276046
XLOC_016884	Ddx47	chr6:134961629-134973794	35.3246	32.3471	33.9657	35.2895	32.0045	25.1756	27.2351	32.4082	34.2317	29.2058	-0.229077	0.039575
XLOC_021544	Acad8	chr9:26781725-26807134	8.27734	7.76407	8.10235	8.84226	6.55215	7.31451	6.50439	7.78789	8.2465	7.03974	-0.228262	0.0199896
XLOC_020233	Gnpat	chr8:127386932-127413957	42.8834	42.7531	47.2349	50.6357	41.6606	38.0943	42.2095	34.6918	45.8768	39.164	-0.228234	0.0405497
XLOC_021409	Ctnnb1	chr9:120842517-120869625	255.663	275.727	276.397	274.568	222.067	221.475	274.775	207.261	270.589	231.394	-0.225747	0.0465005
XLOC_008629	Man2a1	chr17:64950988-65104450	12.265	12.2357	12.6783	14.0873	11.6725	11.0674	11.0047	10.0969	12.8166	10.9604	-0.225714	0.0142003
XLOC_022384	Dlg3	chrX:97963061-98013749	10.3678	12.084	12.5697	12.6847	9.6988	10.3685	10.7558	10.0226	11.9265	10.2114	-0.223993	0.0256866
XLOC_023091	Hccs	chrX:165749462-165758275	14.9475	14.9036	15.6264	15.6864	11.1077	15.3053	13.1216	12.8986	15.291	13.1083	-0.2222	0.0488017
XLOC_023028	Gnl3l	chrX:147417675-147451865	33.9683	34.3016	37.1886	41.5107	30.9073	32.7852	28.9729	33.3594	36.7423	31.5062	-0.221806	0.0403224
XLOC_011248	Pank2	chr2:131088235-131178628	9.98534	10.4852	10.3088	11.295	9.31335	7.89627	9.46336	9.4316	10.5186	9.02614	-0.220759	0.0191311
XLOC_003524	Eif5a	chr11:69730213-69735460	1027.15	890.176	905.142	799.057	845.51	750.273	769.384	742.649	905.381	776.954	-0.220696	0.0498819
XLOC_011891	Clp1	chr2:84563278-84567425	19.3377	18.8596	17.9276	18.3973	16.6877	16.1163	16.2202	14.9334	18.6305	15.9894	-0.220554	0.00152329
XLOC_003265	Cep68	chr11:20127039-20149427	11.5096	10.1926	11.7461	11.8865	9.72543	10.2032	8.66493	10.3789	11.3337	9.74311	-0.218164	0.0270124
XLOC_023029	Tsr2	chrX:147481775-147531086	11.3081	11.4954	11.2291	11.3843	9.22154	10.1376	9.60199	10.1998	11.3542	9.79023	-0.213814	0.000609908
XLOC_016779	Bcl2l13	chr6:120786247-120842860	15.3128	13.9354	15.6681	15.2758	14.1676	13.6624	12.515	11.6639	15.048	13.0022	-0.210816	0.0238954
XLOC_005590	Trip13	chr13:74049909-74075215	35.1677	38.1983	35.5515	39.2987	31.3868	34.9679	29.5722	32.1432	37.0541	32.0175	-0.210769	0.0155821
XLOC_004196	Fam179b	chr12:66066728-66123560	14.7229	16.4724	17.2024	18.0706	13.0992	15.1172	14.7039	14.7131	16.6171	14.4083	-0.205761	0.0390367
XLOC_022002	Cnot10	chr9:114494991-114549318	24.4661	26.2342	23.857	28.139	21.2144	22.6362	24.3664	20.9679	25.6741	22.2962	-0.203513	0.0345754
XLOC_014664	Toe1	chr4:116393559-116480164	18.1617	18.1932	17.8355	15.7561	15.3505	14.0771	15.9468	15.3951	17.4866	15.1924	-0.202904	0.0172915
XLOC_004657	Ppp2r5e	chr12:76551867-76697187	14.8985	14.5744	15.5342	16.7857	13.7301	14.6235	12.2755	13.1417	15.4482	13.4427	-0.200616	0.0278124
XLOC_012701	4930579G24Rik	chr3:79433000-79436741	10.3877	11.1667	10.3668	10.007	9.7962	9.22556	8.92123	8.54997	10.482	9.12324	-0.200303	0.00916381
XLOC_005633	Aggf1	chr13:96120671-96145289	29.7491	30.067	33.558	34.4508	29.1912	29.4035	26.964	25.8518	31.9562	27.8526	-0.198284	0.0321591
XLOC_000811	Lancl1	chr1:67047090-67085446	4.67429	4.38902	3.90447	4.413	3.69048	3.91041	3.57446	3.98002	4.3452	3.78884	-0.197664	0.0243828
XLOC_000172	Atic	chr1:71603729-71625977	103.686	99.6585	96.1504	104.347	90.4157	91.006	79.5792	91.1616	100.96	88.0406	-0.197549	0.00908059
XLOC_015739	Abcf2	chr5:24071158-24083285	71.8074	67.7874	76.0441	75.2298	70.45	59.6819	58.6958	64.8686	72.7172	63.4241	-0.197266	0.0303563
XLOC_009372	Wdr55	chr18:36919892-36925868	42.3305	41.0498	44.4725	40.7054	37.0524	35.3295	35.4156	39.272	42.1395	36.7674	-0.196749	0.00524892
XLOC_016416	Nup205	chr6:35127615-35197598	62.2764	71.4282	71.4268	70.5204	59.2038	60.676	64.2948	56.3818	68.9129	60.1391	-0.196472	0.0192753
XLOC_004190	Gemin2	chr12:60114379-60128975	12.7758	14.4465	14.2326	13.1877	12.3646	10.8523	11.3496	13.1679	13.6607	11.9336	-0.194997	0.0390094
XLOC_011144	Rad51	chr2:118938552-118961806	35.0483	36.0829	36.675	41.2131	31.9548	33.9617	30.2618	34.08	37.2548	32.5646	-0.194124	0.0286284
XLOC_022191	Slc25a5	chrX:34335646-34338801	563.962	588.029	544.405	503.006	529.59	478.823	464.884	451.868	549.851	481.291	-0.192129	0.0324504
XLOC_002551	G3bp1	chr11:55283253-55314389	232.037	206.172	231.896	242.755	212.752	202.273	197.004	187.603	228.215	199.908	-0.191057	0.0234659
XLOC_011037	Celf1	chr2:90780553-90859654	76.5254	72.2341	72.9515	82.2896	70.3984	69.7284	59.1736	67.1342	76.0002	66.6086	-0.190293	0.0346005
XLOC_020454	Zfp866	chr8:72285222-72298810	6.99156	6.88759	6.73049	7.07288	6.25723	5.39071	6.62016	6.01957	6.92063	6.07192	-0.188751	0.0196343
XLOC_016765	Hnrnpf	chr6:117850357-117875640	433.785	422.206	447.394	461.936	382.171	391.265	359.521	419.878	441.33	388.209	-0.185026	0.0127421
XLOC_013331	Chtop	chr3:90302879-90313365	56.6848	54.6675	58.18	57.0608	53.6809	49.523	51.4732	44.8677	56.6483	49.8862	-0.183391	0.0152777
XLOC_018474	Ppp2r2d	chr7:146038068-146074739	35.0729	34.363	36.7453	38.419	28.677	31.3242	32.2707	35.3177	36.1501	31.8974	-0.180559	0.0413041
XLOC_005891	Naa30	chr14:49791901-49810706	23.4701	24.5053	23.0596	27.9505	21.5447	22.2072	22.3728	21.4635	24.7464	21.8971	-0.176481	0.0457492
XLOC_020119	Slc7a6	chr8:108692774-108722604	28.3767	28.9605	27.7662	25.4371	25.0108	24.3393	24.9019	23.728	27.6351	24.495	-0.174016	0.00897989
XLOC_022016	Oxsr1	chr9:119147550-119231545	32.9764	33.896	32.241	36.4665	29.2159	29.6535	30.7332	31.0606	33.895	30.1658	-0.168158	0.0106195
XLOC_000790	Ndufs1	chr1:63161044-63223396	53.605	58.2105	54.9823	51.4119	44.94	49.5627	53.0255	46.8635	54.5524	48.5979	-0.166749	0.0387665
XLOC_017641	Zfp110	chr7:13420158-13435933	15.7093	18.727	18.0374	18.1499	15.9378	16.6155	14.8604	15.665	17.6559	15.7697	-0.162997	0.0474102
XLOC_018463	2700050L05Rik	chr7:140829357-140864700	11.378	11.7116	12.4316	13.5629	11.1433	10.5987	10.8556	11.3292	12.271	10.9817	-0.160154	0.0446345
XLOC_021014	Zfp259	chr9:46081146-46090725	32.1046	33.4473	33.8935	33.0075	28.4844	29.6583	28.6668	31.8284	33.1132	29.6595	-0.158914	0.00689062
XLOC_021127	Clpx	chr9:65142101-65178465	15.3891	14.5213	14.5647	15.5345	12.4421	14.5462	13.2882	13.5016	15.0024	13.4445	-0.158175	0.0221079
XLOC_011507	Vapb	chr2:173563071-173609837	15.1991	16.6596	14.6688	14.4991	13.2811	14.7381	12.8477	13.8663	15.2566	13.6833	-0.157022	0.0489269
XLOC_008845	Ube2i	chr17:25397455-25412473	125.848	118.073	122.475	115.956	119.133	106.818	98.3655	108.981	120.588	108.324	-0.154728	0.0435355
XLOC_018376	Ubfd1	chr7:129210711-129225713	64.5109	58.1034	66.2435	63.8372	60.6071	55.8945	56.907	53.8633	63.1737	56.818	-0.152978	0.0306794
XLOC_010021	Rcl1	chr19:29175864-29218333	49.3411	52.089	55.4487	48.9047	48.7875	47.9062	43.4741	45.1722	51.4459	46.335	-0.150953	0.0391009
XLOC_006785	Xpnpep3	chr15:81230617-81285318	6.37058	7.38723	7.42705	7.11977	6.38375	6.39683	6.26924	6.4604	7.07616	6.37756	-0.149963	0.0305215
XLOC_003641	Crlf3	chr11:79860000-79894457	25.5348	26.0151	27.4835	28.1172	24.0303	25.4088	24.516	23.2129	26.7876	24.292	-0.141087	0.0168309
XLOC_008127	Hmgn1	chr16:96343194-96349332	454.458	476.975	414.114	442.582	412.184	421.087	393.656	396.898	447.032	405.956	-0.139055	0.0305797
XLOC_015390	Ddx51	chr5:111082469-111089515	12.9751	12.4433	12.7607	13.3557	11.5478	12.4058	11.0098	12.354	12.8837	11.8293	-0.123176	0.0344913
XLOC_000304	Ing5	chr1:95700541-95718677	20.326	20.2386	21.5757	20.1688	19.0234	19.0967	19.7392	18.6019	20.5773	19.1153	-0.106324	0.0116675
XLOC_015470	Ppp1cc	chr5:122608287-122625278	187.62	189.765	178.287	193.843	169.18	182.022	175.263	171.338	187.379	174.451	-0.103138	0.0245961
XLOC_001278	Zbtb2	chr10:5958432-5979467	10.6748	10.6797	10.9966	11.2145	10.1495	10.6509	9.57989	10.4468	10.8914	10.2068	-0.0936627	0.0429151
XLOC_001773	Atp5b	chr10:127520362-127527444	673.23	722.283	670.736	653.865	698.593	724.553	731.268	732.141	680.028	721.639	0.0856816	0.0470221
XLOC_020064	Usb1	chr8:97856183-97871413	11.5977	10.8083	10.5699	10.5865	11.4422	11.8067	11.7691	11.3374	10.8906	11.5889	0.089654	0.0407682
XLOC_020602	Got2	chr8:98388036-98412265	134.81	131.564	133.638	118.343	140.157	134.705	145.162	142.191	129.589	140.554	0.117181	0.0470278
XLOC_004698	Numb	chr12:85134983-85262884	16.3924	18.3214	15.9456	16.4665	19.5704	17.8472	18.8878	17.8163	16.7815	18.5304	0.143026	0.0416683
XLOC_013474	Strip1	chr3:107415449-107434628	16.4513	15.5408	14.1916	16.1187	17.1757	16.3692	18.3229	16.9359	15.5756	17.2009	0.143198	0.0454123
XLOC_004593	Heatr5a	chr12:52976859-53072308	17.8755	18.0603	18.505	18.494	20.4301	20.2078	21.6698	18.4295	18.2337	20.1843	0.146626	0.0294297
XLOC_013709	Nfx1	chr4:40917975-40973025	37.9659	35.8269	38.4741	41.3427	39.6598	41.6004	43.9428	44.9242	38.4024	42.5318	0.147345	0.0454845
XLOC_011500	Rae1	chr2:172825617-172841240	56.8908	55.0172	59.5116	56.2909	59.4746	62.2562	61.1029	70.0503	56.9276	63.221	0.151275	0.0473374
XLOC_005499	2210016F16Rik	chr13:58481406-58486586	12.0019	13.138	12.3422	11.4448	13.3512	13.418	13.1563	14.4196	12.2317	13.5863	0.151522	0.0244289
XLOC_010739	Gle1	chr2:29790928-29814952	17.1363	16.8212	17.1838	17.846	19.8268	19.1499	17.8558	19.9467	17.2468	19.1948	0.154385	0.0100213
XLOC_021872	Tbc1d2b	chr9:90096886-90165607	5.91938	5.75064	5.1536	5.66877	6.39817	6.36224	6.51629	5.7917	5.6231	6.2671	0.156433	0.0317169
XLOC_019894	Sugp1	chr8:72566711-72595852	14.5923	13.5024	13.9516	15.7209	15.8811	16.1498	16.1609	16.1975	14.4418	16.0973	0.15657	0.0144961
XLOC_009200	Myl12a	chr17:71343132-71351873	66.2986	68.4673	60.0771	65.8722	72.4895	70.7309	69.3057	78.5684	65.1788	72.7736	0.159013	0.0312603
XLOC_001784	Cs	chr10:127774887-127799535	88.3642	85.6887	87.9744	88.2648	101.767	95.4337	96.1484	100.472	87.573	98.4553	0.168982	0.000665226
XLOC_009921	Ddb1	chr19:10680114-10704311	227.03	206.383	240.92	250.049	264.447	252.127	264.904	259.559	231.095	260.259	0.17146	0.0262812
XLOC_002108	Pias4	chr10:80616715-80630465	23.8686	21.8252	21.5102	21.6382	26.3724	24.4274	24.9254	24.443	22.2105	25.042	0.173108	0.00773132
XLOC_019692	Carkd	chr8:11497505-11513286	13.1026	14.5263	13.2214	12.8136	15.3779	15.625	15.3594	14.2409	13.416	15.1508	0.175442	0.0121977
XLOC_002263	Tspan31	chr10:126504345-126507317	50.9114	54.2878	47.7642	49.3918	57.7788	53.8787	54.8252	62.2318	50.5888	57.1786	0.176658	0.0303474
XLOC_018861	Actn4	chr7:29666674-29747299	153.915	141.3	140.624	134.955	156.634	156.938	169.796	162.396	142.699	161.441	0.178037	0.00996064
XLOC_011353	Kif3b	chr2:153117151-153159125	6.28941	6.4322	5.94669	6.29967	6.38152	6.94703	7.50155	7.44117	6.24199	7.06782	0.179258	0.0256999
XLOC_022161	Uba1	chrX:20235427-20260305	125.104	117.302	127.236	123.58	144.471	140.449	133.375	140.642	123.305	139.734	0.180449	0.00198244
XLOC_003763	Cwc25	chr11:97606783-97627927	8.54946	9.23839	7.87755	9.49214	10.2823	9.95634	9.39346	10.2122	8.78938	9.96108	0.180539	0.0303901
XLOC_010246	Scyl1	chr19:5740903-5771401	31.5984	29.6192	29.4844	26.8357	35.5508	30.9538	34.4093	32.9711	29.3844	33.4713	0.187871	0.0260914
XLOC_015597	Sun1	chr5:139676590-139725793	15.0974	13.9796	12.2047	14.2984	15.203	16.3248	16.0025	15.8549	13.895	15.8463	0.189578	0.0245908
XLOC_014444	Tstd2	chr4:46052093-46151347	15.0524	13.4574	15.8991	14.5717	16.5854	17.1531	16.0881	17.4695	14.7452	16.824	0.190282	0.0128542
XLOC_015640	Arpc1a	chr5:145844737-145869625	56.6503	53.302	57.9815	51.464	67.1486	61.3187	64.1606	57.7357	54.8495	62.5909	0.190476	0.0213974
XLOC_000993	Mdm4	chr1:134886421-134921925	18.1583	18.6396	18.2882	19.2747	19.5654	20.8441	20.8749	23.6831	18.5902	21.2419	0.192369	0.0262019
XLOC_016814	Phb2	chr6:124662306-124666963	224.948	226.081	212.978	232.515	243.02	260.531	237.643	283.392	224.131	256.147	0.19263	0.0277879
XLOC_001490	Zfp280b	chr10:75495356-75505714	23.263	21.2244	24.3091	24.96	26.4798	28.7321	26.4164	25.5597	23.4391	26.797	0.193153	0.0194987
XLOC_007236	Rrp7a	chr15:82930634-82953231	59.6193	61.2976	58.8941	59.0996	69.6472	69.2928	66.0361	68.6404	59.7277	68.4041	0.195684	0.000116572
XLOC_001787	Smarcc2	chr10:127896291-127927230	13.3942	13.4409	11.3437	12.9036	14.7039	14.8413	14.2764	14.6929	12.7706	14.6286	0.195968	0.010419
XLOC_018520	Taldo1	chr7:148578058-148588875	93.2212	96.5914	89.5421	87.4911	109.259	107.836	102.003	101.599	91.7114	105.174	0.197608	0.00306512
XLOC_011637	Tubb4b	chr2:25074264-25080222	314.688	316.077	323.475	310.951	406.446	353.319	346.589	344.583	316.298	362.734	0.19763	0.020801
XLOC_018428	Bckdk	chr7:135047586-135053178	24.676	21.5722	23.6753	23.6654	24.3913	26.2737	28.8801	27.8029	23.3972	26.837	0.197886	0.0262336
XLOC_001053	Rgl1	chr1:154364659-154472241	9.70046	8.79785	9.61152	7.95019	10.5413	9.72721	10.581	10.5343	9.01501	10.346	0.198666	0.0271464
XLOC_015139	Tacc3	chr5:34000795-34014846	48.0774	51.2294	53.344	48.0994	55.1137	61.1495	56.0861	58.9131	50.1876	57.8156	0.204129	0.00669109
XLOC_015552	Mdh2	chr5:136254518-136266256	196.398	179.744	182.158	182.714	207.657	220.1	196.969	229.069	185.253	213.449	0.204389	0.0123117
XLOC_004798	Setd3	chr12:109344640-109417494	30.3126	25.0352	26.6054	29.7281	31.3148	35.6336	32.1752	29.8977	27.9203	32.2553	0.208222	0.0483332
XLOC_003098	Cog1	chr11:113510842-113545465	10.8819	11.2474	11.4832	10.7024	13.576	11.8343	13.8204	11.9879	11.0787	12.8046	0.208876	0.019873
XLOC_019416	Dennd5a	chr7:117037294-117103936	17.1371	14.2801	14.3477	17.4818	17.9789	19.0703	18.9292	17.2615	15.8117	18.31	0.21164	0.0414698
XLOC_017225	Exoc6b	chr6:84568479-85019507	5.09871	5.23407	4.54097	4.56056	5.57627	5.80876	5.93366	5.18986	4.85858	5.62714	0.211867	0.0195234
XLOC_008862	Pigq	chr17:26063368-26078907	19.978	20.5241	18.5555	17.4214	23.44	21.6101	21.2361	22.3034	19.1197	22.1474	0.212074	0.0120645
XLOC_014822	Dhdds	chr4:133524971-133556779	11.4142	10.3616	10.7915	10.9494	12.5652	11.4913	14.3762	11.9869	10.8792	12.6049	0.212416	0.0412166
XLOC_019547	2310057M21Rik	chr7:138486231-138506212	9.41724	11.8379	11.506	11.8988	12.8811	12.9991	13.7416	12.3001	11.165	12.9805	0.217362	0.0331136
XLOC_019654	Cttn	chr7:151621628-151656840	51.0604	44.4261	45.0647	45.9757	53.8091	52.8049	56.8683	53.3882	46.6317	54.2176	0.21745	0.00505864
XLOC_012725	Arhgef11	chr3:87422672-87552545	7.5449	6.06092	5.94867	6.0968	7.82784	7.29738	7.21521	7.49518	6.41282	7.4589	0.218004	0.0407037
XLOC_016069	Gltp	chr5:115119510-115140944	26.8834	25.458	27.5979	25.6824	33.1153	32.2316	26.9722	30.5394	26.4054	30.7146	0.218091	0.0247869
XLOC_016819	Zfp384	chr6:124959255-124987888	16.8411	13.5237	15.2473	15.8483	18.7069	17.1146	16.7883	18.926	15.3651	17.8839	0.219008	0.0291745
XLOC_018824	Hnrnpul1	chr7:26507057-26539739	65.6322	60.3612	60.0604	66.4991	74.0516	69.4239	73.2274	77.2645	63.1382	73.4918	0.219071	0.00447414
XLOC_021339	Uqcrc1	chr9:108838660-108851686	121.407	109.287	115.966	100.279	138.648	124.367	136.001	122.36	111.735	130.344	0.222246	0.0227475
XLOC_008233	Ppp2r1a	chr17:21082417-21102869	156.62	144.123	142.662	151.248	177.471	164.822	170.722	180.73	148.663	173.436	0.222357	0.00211532
XLOC_022323	Gdi1	chrX:71550350-71557206	22.0049	19.6186	19.5457	19.9343	23.1121	23.687	24.4364	23.4731	20.2759	23.6772	0.223731	0.00189305
XLOC_011672	Inpp5e	chr2:26244867-26264708	9.56761	9.30729	9.96218	9.86918	11.1825	12.1981	10.4285	11.4193	9.67657	11.3071	0.224662	0.00607439
XLOC_002071	Rnf126	chr10:79221259-79229697	65.4324	54.146	57.8592	56.4258	74.0377	70.4958	64.7811	64.2624	58.4659	68.3942	0.226281	0.0264071
XLOC_011401	Rpn2	chr2:157034285-157152054	104.785	105.265	105.572	104.693	120.115	125.664	131.664	115.556	105.079	123.25	0.230114	0.00200203
XLOC_003082	Helz	chr11:107409273-107548257	28.0052	24.1675	26.268	28.3512	33.3634	29.91	29.3726	32.6697	26.698	31.3289	0.230765	0.0152467
XLOC_000919	Stk25	chr1:95408680-95532304	15.4573	14.4356	13.7742	13.511	15.9016	17.3024	18.3746	15.6462	14.2945	16.8062	0.233531	0.0172658
XLOC_011389	Ergic3	chr2:155833860-155844015	53.063	51.5643	47.3953	45.2405	57.4231	56.3837	65.2903	52.9677	49.3158	58.0162	0.234407	0.0336431
XLOC_004753	Ttc7b	chr12:101514818-101759032	17.9237	18.7582	17.3132	18.18	20.8541	21.4018	23.4414	19.2268	18.0438	21.231	0.234673	0.0133789
XLOC_013936	Cc2d1b	chr4:108292560-108306727	22.2074	22.3022	21.173	19.2991	24.3138	24.1501	27.7096	23.8296	21.2454	25.0008	0.234821	0.0168453
XLOC_012648	Spg20	chr3:54916029-54941254	11.3229	11.3798	10.4158	10.6512	12.3393	13.2556	13.8362	12.0792	10.9424	12.8776	0.234928	0.00643397
XLOC_004742	Sel1l	chr12:93044482-93087597	16.8195	16.5797	16.2074	18.8864	18.3312	19.8818	23.0663	19.3312	17.1232	20.1526	0.235011	0.04329
XLOC_020217	Tcf25	chr8:125897652-125928073	61.4969	62.5238	59.1293	61.9431	66.2513	75.0486	81.197	66.0231	61.2733	72.13	0.235341	0.0276602
XLOC_008817	Ccnf	chr17:24360176-24388354	47.9724	46.3984	45.7831	50.2535	63.2897	53.9462	53.227	53.7078	47.6018	56.0427	0.235508	0.0180302
XLOC_001751	Dctn2	chr10:126703317-126725827	46.4183	49.0816	42.0147	41.7969	56.225	50.5683	57.2429	47.4299	44.8279	52.8665	0.237958	0.0335626
XLOC_004456	Rcor1	chr12:112278008-112351597	20.7758	26.2966	22.9743	24.5833	25.8406	30.3425	29.8145	25.7197	23.6575	27.9293	0.239483	0.046929
XLOC_013095	Zfp704	chr3:9427009-9610085	3.13389	2.97896	2.65574	3.15607	3.84444	3.26988	3.36168	3.60781	2.98116	3.52095	0.24009	0.0207253
XLOC_000713	Mgat4a	chr1:37496184-37593104	3.42244	4.1808	3.63317	3.98495	4.22257	4.52904	4.37024	4.87946	3.80534	4.50033	0.242005	0.0200856
XLOC_009940	Osbp	chr19:12040333-12068604	18.4858	19.3402	18.055	18.624	22.2035	21.3382	24.0769	20.538	18.6262	22.0391	0.242731	0.00544806
XLOC_000189	Ctdsp1	chr1:74438182-74443859	28.5291	25.3736	26.709	23.5107	31.9693	32.6688	31.6155	26.9725	26.0306	30.8065	0.243027	0.0291176
XLOC_007777	Tmem186	chr16:8633823-8637794	8.11349	7.23985	9.02924	7.92927	9.89232	10.0836	9.24747	9.03563	8.07796	9.56475	0.243737	0.0157479
XLOC_020167	Atmin	chr8:119467292-119484345	12.0341	10.9791	13.4801	12.6426	14.6621	14.1365	14.0757	15.364	12.284	14.5596	0.245191	0.00939764
XLOC_014173	Emc1	chr4:138908507-138934645	22.0678	18.8917	19.7507	21.3145	25.9536	24.1709	26.2829	20.9635	20.5062	24.3427	0.247432	0.0351763
XLOC_010271	Plcb3	chr19:7028202-7044242	19.953	13.9582	16.9947	17.4577	21.6669	19.6982	19.8111	20.1392	17.0909	20.3288	0.2503	0.0485345
XLOC_006209	Prkcd	chr14:31408539-31439394	13.9792	12.3335	11.9875	14.444	15.3484	16.5032	17.1407	13.7958	13.1861	15.697	0.251479	0.0384746
XLOC_015817	Wdr1	chr5:38918051-38952834	60.2861	54.1204	58.2708	63.7482	68.4854	75.621	70.0482	67.543	59.1064	70.4244	0.252762	0.00577174
XLOC_017343	Tmcc1	chr6:115968635-116143392	3.52021	3.82297	4.0802	3.60105	4.115	5.06565	4.72428	4.00052	3.75611	4.47636	0.253089	0.0433012
XLOC_003702	Akap1	chr11:88692105-88725900	23.183	17.7021	22.6137	20.8788	23.824	23.7881	27.7771	25.3351	21.0944	25.1811	0.25548	0.0385754
XLOC_009437	Hsd17b4	chr18:50287854-50355924	28.0979	28.3978	27.3574	29.8868	30.7657	33.79	38.0521	33.3104	28.435	33.9796	0.257	0.0134367
XLOC_002796	Fam222b	chr11:77908174-77970841	11.5934	12.2469	11.1893	10.896	13.7527	14.5439	11.7439	14.8411	11.4814	13.7204	0.257024	0.0252987
XLOC_019580	Tubgcp2	chr7:147181853-147222249	16.2718	15.3815	16.3109	16.8794	18.3757	20.7118	19.1009	19.3425	16.2109	19.3827	0.257807	0.00153357
XLOC_002078	Polr2e	chr10:79498697-79502404	93.3173	74.6501	75.8041	74.7618	97.1524	94.919	84.6166	104.193	79.6333	95.2202	0.257896	0.0433066
XLOC_003050	Hexim1	chr11:102977638-102981038	16.0882	15.3037	18.1385	19.4629	18.8636	23.0141	20.07	20.5563	17.2483	20.626	0.258008	0.0395973
XLOC_022162	Cdk16	chrX:20265618-20277003	35.0201	30.9302	27.8515	30.2641	40.1118	35.59	37.6103	35.1648	31.0165	37.1192	0.259132	0.0171831
XLOC_020839	Dnm2	chr9:21229351-21314630	31.3306	28.5421	28.3212	25.4731	34.8946	34.581	35.5806	31.0911	28.4168	34.0368	0.260355	0.0113894
XLOC_010521	Xpnpep1	chr19:53065669-53113144	56.0241	53.6421	59.1722	53.068	59.064	71.0865	71.179	64.6942	55.4766	66.5059	0.261604	0.0140972
XLOC_007770	Rogdi	chr16:5008821-5013646	12.3033	12.1375	11.5718	11.2841	16.1772	13.9077	14.2379	12.384	11.8242	14.1767	0.261782	0.0278474
XLOC_010168	Fam160b1	chr19:57435498-57464084	10.2332	9.45079	9.47121	11.327	12.4923	12.4807	11.4673	12.1098	10.1205	12.1375	0.262187	0.00701776
XLOC_010122	Gbf1	chr19:46227047-46361000	20.4254	18.4509	19.9663	20.1967	23.0483	21.475	27.1357	23.2547	19.7598	23.7284	0.264046	0.0213238
XLOC_011673	Sec16a	chr2:26264950-26300736	24.0224	20.6589	19.8054	23.1511	25.6222	25.6604	26.0744	27.8873	21.9094	26.3111	0.264117	0.00816137
XLOC_005072	Prelid1	chr13:55423415-55431091	327.996	329.931	308.344	285.639	362.95	366.334	394.225	380.334	312.977	375.961	0.264523	0.00242802
XLOC_020098	Elmo3	chr8:107829500-107834523	1.55516	1.26372	1.75843	1.72132	1.99475	1.81416	1.96353	1.79541	1.57466	1.89196	0.264845	0.0425288
XLOC_015410	Usp30	chr5:114550341-114572933	5.69857	6.29438	5.28723	5.23299	6.77605	7.31319	7.30358	5.65994	5.62829	6.76319	0.265007	0.048447
XLOC_014318	Nsmaf	chr4:6323353-6381418	8.22626	8.01655	9.03211	9.7988	10.3821	11.4446	9.55732	10.7708	8.76843	10.5387	0.265307	0.0204724
XLOC_011396	Dlgap4	chr2:156439440-156590099	14.097	11.7802	10.8376	10.7648	13.3866	14.3275	15.8577	13.4962	11.8699	14.267	0.265374	0.0474258
XLOC_020148	Vac14	chr8:113142537-113244299	28.8199	25.7744	25.2935	27.2663	32.7335	32.0335	33.8737	30.4254	26.7885	32.2665	0.268423	0.00222892
XLOC_003736	Kat7	chr11:95133166-95171560	24.2773	19.6914	22.4914	25.4371	27.0956	27.9261	25.6469	30.1078	22.9743	27.6941	0.269558	0.0232311
XLOC_014263	Acot7	chr4:151552208-151645964	28.2363	24.6783	25.6222	26.3722	33.5761	33.7598	30.7701	28.3966	26.2272	31.6257	0.270029	0.0107867
XLOC_020122	Cdh3	chr8:109034790-109080808	12.1788	11.1999	10.0678	11.4304	12.5238	13.4798	12.7663	15.3444	11.2192	13.5286	0.270037	0.0244734
XLOC_001754	R3hdm2	chr10:126827366-126936440	16.1284	17.0514	14.1743	14.9683	18.7156	19.3833	18.5804	18.4861	15.5806	18.7914	0.270318	0.00291974
XLOC_008894	Stk38	chr17:29107829-29144882	20.711	21.1036	21.1702	23.737	23.6559	26.6595	24.9397	29.3826	21.6805	26.1594	0.270936	0.0196438
XLOC_007824	Pi4ka	chr16:17280443-17430919	14.2837	14.5243	15.3645	16.7506	15.8079	18.5819	20.3471	18.8019	15.2308	18.3847	0.271516	0.0281914
XLOC_011245	Cdc25b	chr2:131012683-131024247	4.08127	5.16069	4.57181	4.31219	5.47297	5.53964	5.31764	5.55966	4.53149	5.47248	0.272209	0.00762267
XLOC_003366	Rmnd5b	chr11:51433274-51449398	11.6786	10.2692	12.1132	11.6604	12.8226	12.9821	16.418	13.0084	11.4304	13.8078	0.272611	0.0478477
XLOC_003600	Vps53	chr11:75859727-75993132	13.6275	12.3563	11.5016	14.6516	14.7321	14.6119	17.0624	16.5852	13.0343	15.7479	0.272852	0.0274348
XLOC_021814	Cgnl1	chr9:71474315-71619409	20.7842	17.8175	19.8718	21.3484	25.9097	23.7773	26.1001	20.6987	19.9555	24.1214	0.273532	0.0302739
XLOC_020631	Cenpt	chr8:108368577-108375908	11.1397	11.5176	10.906	11.0117	13.2476	12.8523	13.5323	14.3076	11.1437	13.4849	0.275115	0.000429482
XLOC_015789	Nelfa	chr5:34240828-34278907	21.1202	21.5457	21.5964	20.5216	26.6835	25.1957	21.8586	28.8698	21.196	25.6519	0.275275	0.0245116
XLOC_001564	Ndufs7	chr10:79712196-79719537	111.231	107.299	91.2925	104.012	140.27	117.465	120.88	122.745	103.459	125.34	0.276793	0.0168855
XLOC_013702	Aco1	chr4:40090297-40146042	23.3827	22.7837	24.36	23.2686	25.105	28.009	33.6871	26.8788	23.4487	28.42	0.277394	0.0385967
XLOC_010891	Gorasp2	chr2:70499565-70529782	52.8994	61.553	52.5265	50.589	55.9773	69.5141	67.0383	71.2752	54.392	65.9512	0.278006	0.0336155
XLOC_003752	Sp2	chr11:96805459-96839002	11.9382	12.3997	12.1032	12.1312	14.9378	14.243	15.4219	14.293	12.1431	14.7239	0.278029	0.000128561
XLOC_006904	Dazap2	chr15:100446092-100451192	23.7226	23.4189	22.3907	21.1382	24.1282	29.8262	28.7969	27.1922	22.6676	27.4859	0.278059	0.0127154
XLOC_020220	Def8	chr8:125966855-125987799	16.1635	18.9662	18.7995	17.1009	20.7575	21.8028	22.5364	21.0691	17.7575	21.5414	0.278685	0.00295869
XLOC_008821	E4f1	chr17:24580723-24592256	6.83991	6.30769	6.51256	6.33366	8.82424	7.91034	7.6646	7.14786	6.49845	7.88676	0.279336	0.00964274
XLOC_009787	Atp9b	chr18:80930879-81130797	7.67215	8.85118	8.97352	8.52671	9.20566	10.0587	10.9078	11.1332	8.50589	10.3263	0.279795	0.0137101
XLOC_014657	Mast2	chr4:115979366-116136788	16.554	14.7586	13.2078	17.448	20.0204	18.8494	19.1793	17.3114	15.4921	18.8401	0.282276	0.0228011
XLOC_018335	Tead1	chr7:119822833-120050319	16.0215	14.8934	17.0997	19.3116	20.2649	20.8021	18.8153	22.0636	16.8316	20.4865	0.283504	0.0195912
XLOC_008812	Pdpk1	chr17:24210646-24278561	16.1154	17.1689	15.2522	15.418	15.6135	20.251	21.1219	20.9267	15.9886	19.4783	0.28482	0.0439463
XLOC_018719	Clptm1	chr7:20216928-20250379	47.2102	45.5359	40.4827	35.9597	51.4706	48.5619	54.6641	51.5441	42.2971	51.5602	0.285698	0.0171874
XLOC_012453	Stau1	chr2:166773641-166821778	22.0906	21.7038	21.1585	24.4076	23.7772	27.7014	25.494	32.0093	22.3401	27.2455	0.286379	0.0430374
XLOC_003352	Sqstm1	chr11:50013653-50024292	63.3774	80.4384	62.7748	55.2471	74.2012	80.4133	86.0589	78.7716	65.4594	79.8613	0.286895	0.0492898
XLOC_000693	Bag2	chr1:33802328-33814595	25.0212	28.6012	25.9056	23.5879	29.8665	31.8072	35.6867	28.4724	25.779	31.4582	0.287241	0.0237942
XLOC_004271	Psen1	chr12:85029512-85076149	20.4582	20.409	19.1922	22.3142	23.3856	26.5251	27.2988	23.6758	20.5934	25.2213	0.292462	0.00782882
XLOC_001539	Bsg	chr10:79167102-79174724	254.833	241.129	223.952	184.574	247.168	270.57	310.961	279.444	226.122	277.036	0.292971	0.0448584
XLOC_003901	Plekhm1	chr11:103226405-103273978	8.98258	8.67513	9.41748	9.12266	12.9664	11.0162	10.7966	9.58142	9.04946	11.0902	0.293376	0.0293695
XLOC_016269	Rnf216	chr5:143752571-143874699	19.3427	16.6067	17.5923	17.2446	21.5408	19.9312	24.5403	20.7707	17.6966	21.6958	0.293942	0.0137637
XLOC_006083	Elf1	chr14:79859743-79982283	5.45562	5.96298	7.0728	6.41954	6.86448	7.90535	8.82127	6.98025	6.22773	7.64284	0.295401	0.0480638
XLOC_017038	Zc3hav1	chr6:38260496-38304603	15.8488	18.648	16.1181	15.0722	21.7805	19.434	21.3163	18.0876	16.4218	20.1546	0.295499	0.0178104
XLOC_018252	Trim6	chr7:111367308-111383666	25.5641	29.068	30.9429	27.3586	31.0961	40.6101	34.5274	32.4474	28.2334	34.6702	0.296295	0.0362743
XLOC_013133	Phc3	chr3:30798216-30868337	3.28953	3.05475	3.04702	3.77417	3.42859	4.50977	4.02641	4.20249	3.29137	4.04181	0.296316	0.0385564
XLOC_002096	Ap3d1	chr10:80169722-80204956	50.4329	46.0111	49.705	48.8449	61.4273	55.0548	64.1827	58.8423	48.7485	59.8768	0.296639	0.00216211
XLOC_016653	Aak1	chr6:86799510-86953221	6.9995	7.7321	8.68526	7.8563	7.83095	10.0208	10.1889	10.3906	7.81829	9.60781	0.297355	0.0409674
XLOC_016732	Arpc4	chr6:113328106-113364565	53.039	50.5093	43.8782	40.2165	64.4015	59.734	49.1284	57.5207	46.9108	57.6962	0.298556	0.0478427
XLOC_008364	Zfand3	chr17:30142031-30346965	21.5426	21.442	18.71	20.4184	26.3249	25.473	27.6125	21.6095	20.5282	25.255	0.298957	0.0172412
XLOC_007242	Pacsin2	chr15:83206036-83295036	35.2449	44.5867	34.1113	36.2121	42.7739	44.3872	48.3733	49.3319	37.5388	46.2166	0.30003	0.0229017
XLOC_000819	Pecr	chr1:72305746-72330888	14.6576	17.0547	14.5516	15.1608	19.0042	16.5605	20.7923	19.346	15.3562	18.9258	0.301532	0.0147095
XLOC_017279	Iqsec1	chr6:90609591-90760117	18.1489	16.1956	16.5473	15.486	18.422	21.8122	21.1922	20.4418	16.5944	20.4671	0.302602	0.00584567
XLOC_020499	Eps15l1	chr8:74864895-74945373	24.7222	19.2228	20.5985	20.9942	28.9468	25.8703	24.4009	26.3257	21.3844	26.3859	0.303208	0.0161472
XLOC_016856	Gabarapl1	chr6:129482201-129492349	26.7602	23.9031	28.8635	24.7739	29.6867	30.3115	35.3901	33.3743	26.0752	32.1906	0.303965	0.012425
XLOC_011684	Surf4	chr2:26768897-26789031	106.861	110.454	95.8522	86.2857	113.541	121.833	140.699	117.072	99.8632	123.286	0.303987	0.0285063
XLOC_002377	Ogdh	chr11:6191599-6259097	35.484	30.809	30.5267	35.751	37.7814	39.6474	40.0504	46.2309	33.1427	40.9275	0.304381	0.0155202
XLOC_003199	Limk2	chr11:3243299-3309238	12.3199	11.4179	14.5514	13.1185	16.6811	15.3045	16.5066	14.995	12.8519	15.8718	0.304481	0.00862529
XLOC_004676	Zfp36l1	chr12:81208746-81214000	19.6082	22.1123	20.2978	17.882	24.0796	26.5407	24.5599	23.541	19.9751	24.6803	0.305159	0.00505416
XLOC_011763	Ndufa8	chr2:35891853-35904812	71.7868	62.9146	55.516	55.9357	74.2176	78.9126	77.8661	73.4924	61.5383	76.1222	0.306833	0.0112444
XLOC_020532	Cc2d1a	chr8:86656726-86671652	9.12302	8.26055	8.52244	8.2445	10.9958	9.99939	10.9717	10.297	8.53763	10.566	0.307518	0.000752648
XLOC_005940	Bcl2l2	chr14:55502261-55507071	6.36428	6.59968	7.40957	6.16293	8.12781	7.67462	9.89418	7.19131	6.63412	8.22198	0.309582	0.0501823
XLOC_015863	Rbm47	chr5:66407795-66543163	43.48	46.8515	43.6903	44.3192	52.0968	51.1892	64.3803	53.3615	44.5853	55.257	0.309589	0.0151093
XLOC_008295	Clcn7	chr17:25270338-25299044	12.8399	11.7978	15.1593	12.3996	16.6181	14.846	17.5821	15.8169	13.0492	16.2158	0.313442	0.0149039
XLOC_002725	Zzef1	chr11:72609727-72740622	7.34008	7.32845	6.81197	6.50858	8.17366	8.9745	10.1753	7.47814	6.99727	8.7004	0.31429	0.0322359
XLOC_006757	Triobp	chr15:78778153-78841471	30.2833	28.9481	25.5781	26.5566	39.3063	29.4229	37.3638	32.4105	27.8415	34.6259	0.314612	0.0352198
XLOC_006534	Mycbp2	chr14:103512627-103746017	19.1076	20.0866	21.0062	23.3823	21.4017	27.3574	29.7486	25.5241	20.8957	26.008	0.315748	0.0420714
XLOC_010099	Entpd7	chr19:43764178-43827490	5.15906	5.52831	5.36022	5.11861	5.60093	7.21148	7.7286	5.81376	5.29155	6.58869	0.316302	0.0499859
XLOC_014800	Phactr4	chr4:131911838-131978361	16.9231	17.169	16.8367	19.0269	21.2895	21.3267	21.0475	23.464	17.4889	21.7819	0.31669	0.00137055
XLOC_015675	B3galtl	chr5:150480831-150565174	3.65853	3.50396	3.5133	3.32676	4.17785	5.32537	4.10913	3.82916	3.50064	4.36038	0.316835	0.0435516
XLOC_006274	Ddhd1	chr14:46212848-46277818	5.3313	4.80848	4.93173	4.60743	6.81782	5.94352	5.78254	5.97675	4.91974	6.13016	0.317344	0.00485202
XLOC_016617	Aup1	chr6:83004646-83007676	35.88	43.6184	37.4733	31.6467	48.2351	43.8494	42.9341	50.2494	37.1546	46.317	0.318001	0.0234238
XLOC_007515	Abcf3	chr16:20548675-20561676	14.1995	15.4739	14.1753	13.0344	15.8216	18.0776	19.9601	17.1194	14.2208	17.7447	0.319386	0.0126563
XLOC_007872	Igf2bp2	chr16:22059081-22163372	68.3139	61.61	52.5391	56.6285	66.5469	79.5523	78.1357	74.2197	59.7729	74.6136	0.319949	0.0161118
XLOC_004221	Daam1	chr12:72932064-73093354	10.817	12.9598	13.7075	12.2344	13.6871	15.2414	18.0665	15.1451	12.4297	15.535	0.321736	0.0305973
XLOC_007755	Slx4	chr16:3979122-4001680	8.69007	7.24044	8.17336	8.05817	11.8838	10.5013	9.2656	8.60446	8.04051	10.0638	0.323815	0.0414815
XLOC_014850	Tceb3	chr4:135559284-135577564	13.9818	15.1562	16.1387	14.7732	16.1173	20.5792	18.7772	19.6912	15.0125	18.7912	0.323897	0.0120134
XLOC_020884	Cdon	chr9:35259660-35315237	3.87338	4.30628	4.31059	4.98292	5.23405	5.37616	5.85427	5.4082	4.36829	5.46817	0.323989	0.00605963
XLOC_019920	Myo9b	chr8:73796612-73884611	16.2499	13.9203	15.6121	16.4793	18.9021	19.9961	19.7561	19.452	15.5654	19.5266	0.327096	0.000719516
XLOC_021982	Klhl18	chr9:110328429-110379198	5.6498	5.36881	4.83541	5.87326	7.26643	7.64614	5.76876	6.59795	5.43182	6.81982	0.328298	0.0252767
XLOC_020546	Calr	chr8:87365986-87370830	367.939	428.654	389.068	382.36	405.951	484.335	498.414	580.663	392.005	492.341	0.328784	0.0387589
XLOC_019607	1600016N20Rik	chr7:148380028-148399979	1.35373	1.54011	1.57172	1.28707	1.93526	1.70107	1.69086	1.90503	1.43816	1.80805	0.330217	0.00815231
XLOC_012775	Rab13	chr3:90024738-90029885	7.72619	7.5746	7.03222	7.03352	8.54035	9.39113	8.49602	10.4944	7.34163	9.23048	0.330304	0.00942292
XLOC_000252	Gigyf2	chr1:89223572-89347385	38.3537	43.9969	41.6259	39.9475	45.2154	51.9007	49.4398	59.5786	40.981	51.5336	0.330559	0.0175028
XLOC_015508	Aacs	chr5:125956242-125997773	4.3773	4.64052	6.37812	4.89261	6.17286	7.04304	6.33074	6.02658	5.07214	6.3933	0.333968	0.0387842
XLOC_015078	Nub1	chr5:24191632-24216373	16.0102	18.3039	19.4678	17.5082	18.5867	23.3027	22.1334	25.9226	17.8225	22.4864	0.335348	0.032615
XLOC_022658	Elk1	chrX:20510520-20527734	6.36987	5.36169	6.8645	6.35798	6.93382	7.2297	7.79232	9.53558	6.23851	7.87286	0.335685	0.0485344
XLOC_014253	Rere	chr4:149656024-149996075	47.6801	42.7578	36.4348	39.1531	55.5646	53.4435	45.9155	54.6576	41.5065	52.3953	0.336102	0.0160314
XLOC_015768	Preb	chr5:31252438-31262734	20.03	22.6861	20.4721	20.429	26.1488	26.5714	29.8345	23.0119	20.9043	26.3916	0.336282	0.0112246
XLOC_005233	Il6st	chr13:113254277-113297068	10.3553	11.7651	8.9576	9.82959	10.875	14.3999	13.2089	13.2246	10.2269	12.9271	0.33803	0.0288178
XLOC_011240	Mrps26	chr2:130389492-130391130	50.1138	48.8964	46.8417	37.6215	55.7338	59.9921	58.7945	57.6999	45.8683	58.0551	0.339923	0.00634966
XLOC_012753	Scamp3	chr3:88981406-88986692	49.3863	48.5375	47.5142	46.7652	65.63	51.5387	68.1774	57.9315	48.0508	60.8194	0.339971	0.0156738
XLOC_012460	Tmem189	chr2:167468724-167487044	34.6315	34.2688	31.6983	28.634	47.1905	41.496	40.8497	34.1935	32.3081	40.9324	0.341346	0.0282578
XLOC_010692	Edf1	chr2:25413419-25417602	136.051	164.98	133.519	122.09	162.336	184.999	171.263	187.329	139.16	176.482	0.342774	0.0138955
XLOC_003618	Nek8	chr11:77979607-77990168	2.23972	2.39132	1.81828	2.51109	3.31287	2.6084	2.84841	2.59993	2.2401	2.8424	0.343546	0.0368671
XLOC_015438	Wsb2	chr5:117807313-117828598	18.802	18.8795	23.2821	19.8861	28.1595	22.7781	28.7368	22.9417	20.2124	25.654	0.343943	0.0303813
XLOC_006824	Atxn10	chr15:85166810-85294266	87.152	89.4528	89.9096	103.345	93.6412	127.285	122.978	125.625	92.4649	117.382	0.344238	0.0295323
XLOC_001974	Slc29a3	chr10:60174819-60215530	4.56452	4.22705	4.30774	4.67245	5.46876	5.15034	6.55357	5.40055	4.44294	5.6433	0.345026	0.0106255
XLOC_009735	Fech	chr18:64616203-64648720	13.3544	16.0567	12.0769	13.0269	14.6868	17.8429	18.0443	18.7174	13.6287	17.3228	0.346026	0.0245972
XLOC_013802	Akap2	chr4:57858119-57909856	11.1306	12.9639	12.69	11.9484	13.8931	16.24	18.2643	13.5562	12.1832	15.4884	0.346292	0.0306755
XLOC_013384	Prune	chr3:95057595-95085998	16.5216	14.4264	15.7088	13.1495	18.1283	17.783	19.9048	20.2476	14.9516	19.0159	0.346911	0.0056146
XLOC_003978	Mif4gd	chr11:115469232-115474283	18.2281	14.9719	13.2465	12.9396	18.4956	18.5431	16.7411	21.8311	14.8465	18.9027	0.348469	0.0455362
XLOC_005108	Habp4	chr13:64263173-64287845	3.97038	4.81599	4.22865	4.66818	6.86749	5.31362	5.29644	5.07534	4.4208	5.63822	0.350933	0.0373561
XLOC_021349	Map4	chr9:109834277-109986458	36.7411	32.5145	33.18	32.4483	41.0141	47.0816	39.4357	44.5124	33.721	43.0109	0.351058	0.00353695
XLOC_010261	Arl2	chr19:6134388-6141137	29.1967	29.0126	28.9451	25.5732	41.338	30.5152	32.0722	39.8754	28.1819	35.9502	0.351231	0.0347969
XLOC_019438	Plekha7	chr7:123267631-123333355	15.9027	12.7114	15.1966	13.1988	18.2929	16.9701	21.4545	16.0232	14.2524	18.1852	0.35156	0.0318374
XLOC_011112	Lpcat4	chr2:112079997-112087268	29.0661	25.5449	24.6033	24.294	37.7342	31.1217	35.6823	27.546	25.8771	33.0211	0.351711	0.0305559
XLOC_008945	Kifc1	chr17:34012610-34027578	13.8973	13.8555	18.9479	14.3723	19.5203	20.896	20.6344	16.9624	15.2682	19.5033	0.353182	0.0320914
XLOC_013245	Etfdh	chr3:79407709-79432689	13.6023	15.4524	14.9947	13.6174	14.4538	18.4135	21.4265	19.4351	14.4167	18.4322	0.354489	0.0403781
XLOC_018527	Ap2a2	chr7:148748078-148818910	61.8145	59.7945	61.406	57.421	70.0545	72.9712	95.2868	69.3178	60.109	76.9076	0.355545	0.0363014
XLOC_020187	Cox4i1	chr8:123192189-123198109	353.795	388.051	266.102	291.881	400.08	412.921	395.065	455.682	324.957	415.937	0.356115	0.0266175
XLOC_019908	Ell	chr8:73063573-73116757	7.04759	6.6861	7.85987	6.40378	9.27492	8.55552	9.8968	8.10905	6.99934	8.95907	0.356132	0.0081634
XLOC_010478	Dnmbp	chr19:43921308-44014688	9.1174	8.88384	9.71889	9.02514	11.6655	10.7729	14.517	10.1141	9.18632	11.7674	0.357234	0.039903
XLOC_015531	Rabgef1	chr5:130647688-130690207	6.75809	5.72599	6.7292	6.92065	7.25945	8.95024	9.18407	8.09605	6.53348	8.37245	0.357798	0.0118981
XLOC_002364	Ascc2	chr11:4537795-4583388	21.5244	20.7402	21.8164	21.4757	27.6681	24.1175	27.4182	30.4367	21.3892	27.4101	0.357828	0.00375255
XLOC_011864	Nfe2l2	chr2:75513575-75542698	33.3013	33.9187	37.7899	41.5278	47.8456	42.848	45.7954	51.3785	36.6344	46.9669	0.358444	0.00758504
XLOC_006555	Dock9	chr14:121941260-122196956	5.65545	5.88206	6.64579	8.38383	8.36065	9.25895	7.87811	8.62843	6.64178	8.53153	0.361235	0.0323625
XLOC_013769	Nans	chr4:46502200-46516310	34.104	38.4467	35.0834	32.0022	44.3303	45.6576	41.4436	47.9875	34.9091	44.8547	0.361659	0.00202818
XLOC_017671	Ap2s1	chr7:17323792-17334639	62.1241	60.6645	49.6113	47.672	78.981	67.8326	61.9196	74.051	55.018	70.696	0.361727	0.0244293
XLOC_005442	Fam120a	chr13:48974585-49063197	55.5308	51.7096	53.2272	59.6173	63.3159	78.3755	68.7209	72.6182	55.0212	70.7576	0.362897	0.0047899
XLOC_015220	N4bp2	chr5:66154759-66218023	20.3302	22.86	22.1759	24.724	26.9166	34.4401	24.6627	29.8819	22.5225	28.9753	0.363456	0.0308729
XLOC_005141	Slc12a7	chr13:73901144-73954190	30.2852	22.2075	26.6054	31.7672	38.5561	34.9275	36.9908	32.19	27.7163	35.6661	0.363817	0.0202801
XLOC_019656	Fadd	chr7:151764227-151768341	4.54467	3.80853	3.89586	3.50233	4.47538	5.34194	5.98306	4.4762	3.93785	5.06915	0.364335	0.0381278
XLOC_002106	Sgta	chr10:80506817-80522899	60.4398	61.983	59.3408	58.8101	75.0864	75.4547	75.2259	83.9749	60.1434	77.4355	0.364588	0.000280563
XLOC_013974	Mknk1	chr4:115511850-115551853	4.40803	4.36103	3.84117	3.54034	5.3867	4.48563	6.16209	4.76015	4.03764	5.19864	0.364622	0.0348044
XLOC_015129	Bre	chr5:32000422-32387112	11.0328	10.3574	11.9241	12.6339	12.3846	15.1278	14.533	17.1202	11.487	14.7914	0.36475	0.0234559
XLOC_009560	Crem	chr18:3266351-3366861	2.47674	2.84917	2.94645	2.67691	3.42707	3.09592	3.19847	4.3919	2.73732	3.52834	0.366227	0.0451051
XLOC_019981	Gipc1	chr8:86176576-86188688	24.435	20.4626	20.8361	21.7263	25.6044	31.4803	31.2512	24.4777	21.865	28.2034	0.367246	0.0212377
XLOC_020359	Rab11fip1	chr8:28249244-28285118	6.87498	6.41866	7.19824	8.60545	9.00975	9.99475	8.26907	10.3131	7.27433	9.39667	0.369334	0.0186682
XLOC_020344	Adam9	chr8:26060082-26127394	8.05879	9.86429	10.0488	9.99082	10.9431	13.0615	12.6876	12.3481	9.49067	12.2601	0.369385	0.00594582
XLOC_007492	Klhl22	chr16:17759713-17793475	29.5587	29.7896	35.9081	30.0059	47.7289	40.0724	37.1763	36.9339	31.3156	40.4779	0.370253	0.0209566
XLOC_020627	Acd	chr8:108214805-108224995	17.8469	16.3575	17.3068	14.861	26.0523	18.6416	18.5272	22.6199	16.5931	21.4603	0.371088	0.0441727
XLOC_015356	Lrrc8d	chr5:106128987-106244234	15.1644	14.5281	19.9211	16.7024	20.3499	21.7801	21.1685	22.4992	16.579	21.4494	0.371582	0.00914919
XLOC_009158	Vmac	chr17:56853354-56857122	3.10218	3.36714	2.88619	2.45687	3.4736	3.46417	4.52395	3.82947	2.95309	3.8228	0.372401	0.0326055
XLOC_011333	Tbc1d20	chr2:152119607-152138326	16.6987	17.0061	18.217	12.6971	20.6769	21.2792	24.4047	17.3408	16.1547	20.9254	0.373299	0.0441491
XLOC_000334	Tfcp2l1	chr1:120524521-120581745	10.3548	12.0073	12.0464	10.2454	15.3333	12.4496	16.4923	13.7069	11.1635	14.4955	0.376821	0.0171053
XLOC_021277	Aste1	chr9:105297721-105308086	3.8383	4.33967	3.30912	3.88033	4.14475	5.34554	5.2377	5.22894	3.84185	4.98923	0.377015	0.0173898
XLOC_011318	Pygb	chr2:150612531-150657484	18.2641	21.9419	21.1257	16.1368	24.0986	26.1731	24.4961	25.9128	19.3671	25.1701	0.378104	0.00666194
XLOC_012049	Ptprj	chr2:90269912-90420804	3.67014	2.85265	3.63981	4.00214	4.6716	4.61365	4.36144	4.77147	3.54119	4.60454	0.378825	0.0063081
XLOC_019614	Pddc1	chr7:148594082-148600024	11.1256	11.603	12.6089	11.2547	13.6065	12.9193	18.0259	16.0427	11.648	15.1486	0.379096	0.0282089
XLOC_003293	Sptbn1	chr11:29999394-30119772	47.8953	50.6123	49.7027	57.913	58.07	66.6445	76.0247	67.5577	51.5308	67.0742	0.380323	0.010935
XLOC_018881	Capns1	chr7:30971960-30980067	63.1615	62.9152	53.1057	47.9507	71.0676	85.0825	73.7776	65.7727	56.7833	73.9251	0.380598	0.0213488
XLOC_001051	1700025G04Rik	chr1:153731653-153937450	2.45743	2.6303	2.93111	3.03665	2.87645	3.80821	3.55165	4.18192	2.76387	3.60456	0.383131	0.0333149
XLOC_002606	Smcr8	chr11:60591026-60601789	13.9453	12.4185	16.534	15.043	16.9276	16.5024	20.4658	21.7319	14.4852	18.9069	0.384335	0.0297424
XLOC_003531	Rnasek	chr11:70051624-70053354	67.9411	75.1153	51.9602	56.0945	76.2819	77.2101	85.9742	88.512	62.7778	81.9946	0.385274	0.0205103
XLOC_009898	Gm2518	chr19:8847011-8860907	3.61623	4.49053	4.00686	3.93871	4.95969	4.65274	5.03251	6.32513	4.01308	5.24252	0.385549	0.0244627
XLOC_014599	Jak1	chr4:100741642-100937887	11.7894	12.7744	13.3122	14.4102	13.7289	19.0017	15.3662	20.215	13.0716	17.0779	0.385705	0.0476842
XLOC_015161	Afap1	chr5:36235967-36346571	7.24425	7.53166	6.95602	6.21071	9.95466	9.68458	9.91831	6.95064	6.98566	9.12705	0.385752	0.033699
XLOC_000107	Stat1	chr1:52176281-52218709	3.25311	3.28792	3.1618	3.27176	3.42677	4.29986	4.68029	4.56402	3.24365	4.24273	0.387378	0.0127003
XLOC_002859	Hnf1b	chr11:83664370-83719317	26.0033	26.2434	23.1586	23.4726	33.2374	28.6179	34.0738	33.4489	24.7195	32.3445	0.387872	0.00222817
XLOC_020852	Pigyl	chr9:21961289-21962798	18.1023	16.413	11.1823	15.5844	19.5503	16.8784	22.6071	21.1799	15.3205	20.0539	0.388421	0.048791
XLOC_010566	Frmd4a	chr2:4073908-4535089	8.6659	8.17585	7.45075	7.95439	9.24275	10.0281	13.3271	9.64843	8.06172	10.5616	0.389668	0.0417856
XLOC_019471	Arhgap17	chr7:130422662-130513429	14.2236	18.1311	16.4927	15.5876	21.4623	22.3802	22.086	18.7137	16.1088	21.1606	0.393533	0.00503648
XLOC_006460	Dock5	chr14:68369984-68551629	10.0398	9.85502	9.58268	11.8223	14.271	13.5575	11.122	15.3075	10.3249	13.5645	0.393701	0.0195229
XLOC_012064	Mapk8ip1	chr2:92223832-92241420	9.56155	7.30765	10.038	10.0059	14.5152	11.935	11.0218	11.0392	9.22828	12.1278	0.394185	0.0326795
XLOC_016487	Zfp398	chr6:47785659-47818256	1.6125	2.37956	1.99012	2.22166	2.50012	2.80191	2.61333	2.86789	2.05096	2.69581	0.394421	0.0136186
XLOC_000841	Cnppd1	chr1:75131788-75138942	8.99699	10.3655	9.46419	8.91538	12.7687	11.3037	15.1061	10.4356	9.43552	12.4035	0.394577	0.0327296
XLOC_014994	Prkcz	chr4:154634228-154735500	6.99871	7.81315	9.71077	7.70363	8.47402	10.7723	11.4303	11.7112	8.05656	10.597	0.395413	0.034914
XLOC_017582	Zfp524	chr7:4967109-4970090	4.29769	4.30168	4.18475	3.85789	5.56203	4.44348	6.45417	5.43849	4.1605	5.47454	0.395981	0.0212425
XLOC_018415	Prr14	chr7:134615127-134620272	10.855	9.4408	8.76829	11.0306	13.9622	11.1719	13.1246	14.5489	10.0237	13.2019	0.397334	0.0135094
XLOC_018426	Stx4a	chr7:134985321-134992479	13.2053	14.4545	13.3589	14.9117	17.5321	17.8455	19.1554	19.1409	13.9826	18.4185	0.397521	0.000302161
XLOC_002264	Os9	chr10:126531314-126558216	6.44271	7.97593	6.25812	6.59551	9.45912	8.53447	9.13383	8.81413	6.81807	8.98539	0.398218	0.00264302
XLOC_016795	Foxj2	chr6:122770201-122795384	4.40219	3.28768	4.96234	4.34666	5.22506	6.09578	6.40973	4.67477	4.24972	5.60133	0.398404	0.0433287
XLOC_013284	Apoa1bp	chr3:87860444-87862417	19.8406	15.6413	14.0397	11.6851	20.1667	17.9719	21.255	21.391	15.3017	20.1961	0.400391	0.0412656
XLOC_009275	Svil	chr18:5046586-5119291	4.21653	3.56374	3.42742	4.51451	5.28277	5.68773	3.99436	5.79349	3.93055	5.18959	0.400889	0.041842
XLOC_005783	Kat6b	chr14:22318991-22491700	8.16457	9.51049	9.09187	11.9589	11.9194	12.4223	11.2929	15.5048	9.68146	12.7848	0.401139	0.0460071
XLOC_019410	St5	chr7:116667424-116760661	5.94075	5.13954	6.21309	5.93806	6.93021	7.14753	8.94212	7.65977	5.80786	7.66991	0.401203	0.0104176
XLOC_001781	Stat2	chr10:127707631-127729905	2.82156	1.85464	2.28442	2.12255	3.0642	3.10325	3.00814	2.82122	2.27079	2.9992	0.401383	0.0142062
XLOC_019930	Pgls	chr8:74116082-74120166	37.3607	30.9223	25.0302	25.4273	38.8758	38.3868	45.9661	33.7349	29.6851	39.2409	0.402618	0.0471253
XLOC_002368	Ap1b1	chr11:4838758-4942797	49.3283	38.2485	41.0094	39.0315	58.0102	48.0164	65.8641	49.973	41.9044	55.4659	0.404499	0.0304099
XLOC_011148	Spint1	chr2:119063095-119075249	27.4418	26.5412	31.3206	29.8594	37.2408	37.0799	46.0444	32.0834	28.7908	38.1121	0.404645	0.023873
XLOC_007775	Fam86	chr16:5233713-5256049	10.094	11.8375	8.03517	10.3792	10.8887	14.5851	12.3182	15.6874	10.0865	13.3698	0.406562	0.0494735
XLOC_008873	Cuta	chr17:27074916-27076423	73.416	72.5921	62.0939	71.6424	84.4179	96.4311	90.0909	100	69.9361	92.735	0.407076	0.00191722
XLOC_014095	Mecr	chr4:131399385-131423702	8.26327	7.9606	6.04962	6.95489	8.78744	8.16572	11.3036	10.5013	7.3071	9.68952	0.407126	0.0362854
XLOC_019537	BC017158	chr7:135409210-135441645	14.6106	11.8069	12.1138	12.0671	15.4953	18.0651	19.2644	14.3901	12.6496	16.8037	0.409689	0.0188659
XLOC_008310	Rpusd1	chr17:25864695-25868401	7.81036	6.41177	5.76383	5.35954	8.96259	8.27508	8.81376	7.62248	6.33637	8.41848	0.409902	0.014948
XLOC_004062	Ogfod3	chr11:121038906-121090623	6.56719	6.14397	4.38898	4.39119	6.44219	6.42874	7.89882	7.79001	5.37283	7.13994	0.410229	0.0458513
XLOC_017430	Tead4	chr6:128177160-128250831	9.97584	11.653	11.8143	12.4129	18.0656	15.8712	13.0245	13.9777	11.464	15.2347	0.410254	0.0220716
XLOC_018416	Fbrs	chr7:134628734-134635027	10.5888	10.4121	9.7053	9.00922	16.2086	13.4217	12.489	10.6936	9.92886	13.2032	0.411191	0.0348701
XLOC_003892	Kif18b	chr11:102766832-102786438	12.8509	13.4668	14.1775	14.2453	22.1442	16.0702	15.3745	19.2581	13.6851	18.2117	0.412261	0.0295842
XLOC_000714	4930594C11Rik	chr1:37496184-37593104	1.13341	1.20782	0.858894	1.00629	1.28674	1.27901	1.35369	1.68472	1.0516	1.40104	0.413907	0.0293516
XLOC_003394	Tnip1	chr11:54724288-54776442	14.5153	11.4688	13.5049	13.1998	17.2212	21.4646	16.3058	15.2112	13.1722	17.5507	0.414032	0.0271687
XLOC_005427	Dtnbp1	chr13:45017448-45097465	22.412	21.5429	21.7651	21.6498	28.4149	26.0412	31.6869	30.309	21.8424	29.113	0.414529	0.00108574
XLOC_008719	Ezr	chr17:6942479-6987129	126.057	166.261	152.261	143.418	173.04	188.021	205.86	217.355	146.999	196.069	0.415553	0.0089001
XLOC_013243	Rapgef2	chr3:78866450-78949797	11.7922	9.15019	10.3347	10.5971	12.6464	15.6189	12.8879	14.7289	10.4685	13.9705	0.416325	0.00810811
XLOC_008999	2310061I04Rik	chr17:36029621-36034323	18.1551	15.1137	11.2166	12.8561	17.792	16.7899	20.4258	21.5978	14.3354	19.1514	0.417868	0.0423443
XLOC_015865	Apbb2	chr5:66689963-67010056	7.8495	7.32866	9.46802	9.56737	9.04788	12.5237	11.1034	13.0571	8.55339	11.433	0.418639	0.0348058
XLOC_011538	Ss18l1	chr2:179777187-179804906	1.23655	1.04148	0.97608	1.4321	1.40911	1.61328	1.54207	1.7089	1.17155	1.56834	0.420817	0.0167145
XLOC_004867	Lyst	chr13:13682675-13869707	2.89603	3.08585	3.12248	3.26229	3.42786	3.66313	5.24604	4.22298	3.09166	4.14	0.421249	0.0436732
XLOC_015418	Ankrd13a	chr5:115225148-115255829	41.6336	39.3381	41.2349	33.9076	50.2142	54.972	55.3662	48.6155	39.0286	52.292	0.42206	0.00166663
XLOC_014985	Arhgef16	chr4:153652578-153674004	14.364	12.5398	11.2051	11.6441	17.4175	15.4828	20.6259	13.1539	12.4383	16.67	0.422473	0.0499054
XLOC_010193	Tcirg1	chr19:3896049-3907133	10.5774	7.70223	10.8909	7.74465	13.2744	11.7657	12.2694	12.1803	9.22879	12.3725	0.422917	0.0147479
XLOC_007928	Dirc2	chr16:35694988-35769442	6.02304	5.90499	5.49214	5.49112	7.63598	7.40101	8.39866	7.28157	5.72782	7.6793	0.422989	0.000491073
XLOC_010769	Pomt1	chr2:32092202-32115625	5.12843	4.93899	5.37562	5.22209	7.89686	6.35188	7.59487	5.87959	5.16628	6.9308	0.423895	0.011637
XLOC_018399	Mapk3	chr7:133903139-133909330	85.1189	96.5592	75.0468	70.2204	98.4176	103.836	137.458	98.9102	81.7363	109.655	0.423928	0.044461
XLOC_016887	8430419L09Rik	chr6:135148004-135186258	2.14816	1.45161	1.55936	1.52572	2.23389	1.8377	2.65708	2.24342	1.67121	2.24302	0.424549	0.0487201
XLOC_019018	Nucb1	chr7:52748043-52765778	29.7918	26.2459	28.0583	24.2686	37.2992	35.4869	42.5876	30.0701	27.0911	36.361	0.424568	0.0172033
XLOC_003644	Myo1d	chr11:80295628-80593527	3.90675	3.30688	4.41654	4.08901	4.79138	5.18988	6.00225	5.12435	3.92979	5.27696	0.425254	0.00813121
XLOC_009005	H2-T24	chr17:36131448-36175119	1.83372	1.96237	1.54387	1.70205	1.89478	2.21922	2.79759	2.55603	1.7605	2.36691	0.427015	0.0311216
XLOC_018193	Stard10	chr7:108469832-108494826	59.7322	62.7732	52.4394	50.8436	75.8043	70.1269	80.3466	77.6002	56.4471	75.9695	0.428521	0.0015947
XLOC_019705	Lamp1	chr8:13159134-13175338	182.122	185.111	190.354	159.825	201.496	231.656	290.263	243.322	179.353	241.684	0.430322	0.0191677
XLOC_021317	Amt	chr9:108199252-108203928	54.882	55.1787	50.9426	43.3065	74.0662	66.3701	73.8116	61.1638	51.0774	68.8529	0.430831	0.00531067
XLOC_002608	Map2k3	chr11:60745558-60766305	18.3473	18.172	16.9275	14.2868	23.3555	20.0664	27.2448	20.696	16.9334	22.8407	0.431734	0.0200905
XLOC_003994	Exoc7	chr11:116149311-116168052	8.06723	7.43982	7.16721	7.99685	9.984	9.27279	12.68	9.44597	7.66778	10.3457	0.432149	0.0173077
XLOC_001504	Pttg1ip	chr10:77044511-77061477	35.0075	41.6661	36.2258	32.5373	43.4826	49.373	57.5355	46.206	36.3592	49.1493	0.434851	0.0120724
XLOC_021953	Rnf123	chr9:107951620-107981706	5.2867	5.20909	5.91722	4.62345	8.05864	7.47028	7.61532	5.30064	5.25911	7.11122	0.435277	0.0328046
XLOC_016670	Tpra1	chr6:88852244-88862234	8.20084	9.5496	11.0991	8.6205	11.5547	10.8952	14.9881	13.2864	9.36751	12.6811	0.436942	0.0254746
XLOC_006482	Fam160b2	chr14:70983101-70999642	7.92526	6.8876	7.69272	6.15724	11.0802	10.4299	10.252	7.06708	7.16571	9.7073	0.437961	0.0416334
XLOC_006005	Ctsb	chr14:63741298-63796630	100.798	122.32	110.326	86.1617	112.554	134.393	173.399	148.096	104.901	142.111	0.437979	0.0462478
XLOC_012491	Atp5e	chr2:174286575-174289602	65.1662	86.0437	55.1936	46.4828	87.5986	89.5542	82.9477	82.7668	63.2216	85.7168	0.439161	0.0411061
XLOC_016271	Rbak	chr5:143933867-143942422	3.65175	3.39968	2.80572	2.58294	3.59221	4.42244	4.76528	4.09622	3.11002	4.21904	0.439989	0.0200311
XLOC_008457	H2-Q4	chr17:35516561-35521619	11.306	12.069	11.5345	12.8012	18.5949	12.745	14.0528	19.3781	11.9277	16.1927	0.441031	0.0437976
XLOC_018932	Gpi1	chr7:34986345-35015324	121.725	125.24	116.909	118.122	162.891	158.141	135.827	197.687	120.499	163.637	0.441473	0.0156826
XLOC_011470	Ncoa3	chr2:165818136-165898742	17.428	15.0584	17.3201	23.4133	27.9715	24.4185	21.5283	25.527	18.3049	24.8613	0.441669	0.0260455
XLOC_013439	Vangl1	chr3:101960618-102008616	14.1329	17.4378	15.8315	15.9489	27.2626	18.5217	19.5139	20.7967	15.8378	21.5237	0.442558	0.0341134
XLOC_000344	Mgat5	chr1:129101562-129379549	5.42396	4.01188	4.63176	4.97791	6.36538	7.57526	5.21337	6.73156	4.76138	6.47139	0.442697	0.0245543
XLOC_018337	Arntl	chr7:120350978-120457640	2.31099	3.20661	2.14095	3.45162	3.62153	3.49708	3.56781	4.42362	2.77754	3.77751	0.443627	0.0427015
XLOC_006829	Ttc38	chr15:85662733-85689252	1.87054	2.13548	2.45696	1.94055	3.1677	3.02696	3.19999	2.0345	2.10088	2.85729	0.443651	0.0485262
XLOC_020295	2610019F03Rik	chr8:13952007-13974777	13.8769	16.4829	12.2388	12.4715	16.7529	16.4523	23.9857	17.7527	13.7675	18.7359	0.444536	0.0493332
XLOC_007241	1700001L05Rik	chr15:83184276-83197727	6.09042	7.39994	8.31189	6.3119	7.37484	9.82719	11.6682	9.38996	7.02854	9.56505	0.444548	0.0474543
XLOC_012070	Ext2	chr2:93535787-93662725	18.6496	15.572	15.1842	14.5602	22.608	19.4649	26.6608	18.4113	15.9915	21.7862	0.446113	0.0308965
XLOC_018539	Igf2as	chr7:149836672-149856261	22.0678	20.7956	21.8689	17.0465	31.6262	25.757	30.6151	23.434	20.4447	27.8581	0.446369	0.0172859
XLOC_018090	Abhd2	chr7:86418151-86506487	24.0985	24.0605	22.492	22.6326	36.4097	27.1163	35.6637	27.996	23.3209	31.7964	0.447241	0.0146299
XLOC_002227	Frs2	chr10:116507182-116585530	13.123	12.8977	14.0002	15.1119	13.7464	20.4521	20.8244	20.167	13.7832	18.7975	0.447628	0.0293609
XLOC_002616	Specc1	chr11:61890598-62036515	4.75364	6.16349	5.23562	4.47713	6.58028	7.07474	7.81367	6.67304	5.15747	7.03543	0.447976	0.00678397
XLOC_017396	Atn1	chr6:124692561-124706505	30.7842	25.9405	25.2996	24.0998	45.5254	33.4981	30.9951	34.9466	26.531	36.2413	0.449954	0.032955
XLOC_011829	Cobll1	chr2:64926395-65076683	12.6377	16.551	14.3068	14.2828	14.6647	20.5065	23.6807	20.1408	14.4446	19.7482	0.451192	0.0404507
XLOC_022573	Rbbp7	chrX:159198303-159267331	228.458	270.725	235.526	233.253	295.86	355.105	378.975	296.096	241.99	331.509	0.454098	0.00838439
XLOC_009283	Greb1l	chr18:10325176-10562939	10.7861	14.6645	12.4697	13.0834	14.0189	17.4244	21.2326	17.2009	12.7509	17.4692	0.454212	0.0307917
XLOC_011394	Epb4.1l1	chr2:156246787-156368950	3.67684	3.65357	4.24217	2.60079	4.14436	4.46389	5.55232	5.26866	3.54334	4.85731	0.455046	0.0329048
XLOC_009524	Myo5b	chr18:74602272-74931131	10.2153	12.5424	12.2372	10.2185	13.9634	15.1138	17.453	15.4645	11.3034	15.4987	0.455394	0.00475341
XLOC_007763	Coro7	chr16:4626883-4679720	11.0959	10.7471	10.7683	9.64887	16.7897	12.7515	16.2345	12.1879	10.565	14.4909	0.455849	0.0181617
XLOC_007083	St3gal1	chr15:66934436-67008444	5.81695	5.78838	5.97647	4.04941	5.83908	7.6126	8.31904	7.92694	5.4078	7.42441	0.457235	0.0298585
XLOC_015551	Por	chr5:136165083-136211195	17.9007	14.8575	18.6361	14.5516	24.0057	19.4444	23.6722	23.4838	16.4865	22.6515	0.458325	0.00621763
XLOC_004044	Pcyt2	chr11:120471400-120479204	23.1591	19.729	23.979	20.3406	31.9602	28.0975	33.645	26.1406	21.8019	29.9608	0.458622	0.00671038
XLOC_007513	Dvl3	chr16:20517136-20532260	22.8325	19.3226	19.055	20.7714	31.0887	26.6899	24.2382	30.6525	20.4954	28.1673	0.458724	0.00611648
XLOC_019932	Glt25d1	chr8:74134922-74148810	30.7315	29.6518	28.4674	26.6166	38.7049	40.2049	44.8909	35.0521	28.8668	39.7132	0.460206	0.00274654
XLOC_015181	Cd38	chr5:44260065-44303613	5.20123	5.11425	5.3694	4.69974	5.96168	5.65514	7.78935	8.64565	5.09615	7.01295	0.460613	0.0399932
XLOC_002432	Cpeb4	chr11:31772210-31831577	8.69067	9.01295	8.15016	7.8919	8.60996	12.0762	14.3074	11.4629	8.43642	11.6141	0.461176	0.0381677
XLOC_003040	Tmub2	chr11:102146274-102157943	6.98973	6.2854	6.50493	4.8422	7.82398	8.88971	9.80384	7.38176	6.15556	8.47482	0.461292	0.0174982
XLOC_019833	Triml2	chr8:44268475-44279238	11.961	11.1201	8.2785	10.4506	11.6335	15.6749	16.426	13.8416	10.4526	14.394	0.461613	0.0249776
XLOC_003861	Ezh1	chr11:101052428-101087764	7.04463	7.95374	8.94203	8.54707	9.60695	10.665	13.914	10.5832	8.12187	11.1923	0.462622	0.0241645
XLOC_007792	Zc3h7a	chr16:11136686-11176486	10.0582	9.74415	9.87038	10.26	10.9154	14.7998	13.3868	15.9503	9.98318	13.7631	0.463231	0.0133486
XLOC_006412	Phf11c	chr14:59999669-60012349	0.935385	0.636202	0.991172	0.888582	1.06609	1.20243	1.04432	1.44744	0.862835	1.19007	0.463889	0.0357566
XLOC_012090	Cat	chr2:103294060-103325310	20.8896	18.6099	23.921	20.339	21.5459	28.7972	34.3965	30.8795	20.9399	28.9048	0.465055	0.034646
XLOC_013810	Snx30	chr4:59818521-59917612	9.9467	9.94888	10.365	11.2761	12.729	13.3291	18.7095	12.5846	10.3842	14.3381	0.465463	0.0386703
XLOC_012841	Fam63a	chr3:95086856-95111098	8.11778	9.72407	10.8904	7.69385	12.2668	11.1044	15.1572	11.783	9.10652	12.5779	0.465913	0.0240738
XLOC_013315	Adam15	chr3:89143561-89153932	6.11723	3.93422	4.87466	5.62349	8.37919	7.73748	6.06469	6.21592	5.1374	7.09932	0.466642	0.0383548
XLOC_003202	Smtn	chr11:3417524-3439295	17.2501	19.3578	19.9203	19.2449	30.307	23.8725	25.3064	25.2242	18.9433	26.1775	0.466643	0.00323783
XLOC_011811	Acvr1	chr2:58298848-58419239	7.02348	7.09294	8.94678	9.70038	11.3434	9.27046	14.0349	10.6328	8.1909	11.3204	0.466831	0.0409768
XLOC_002058	Syde1	chr10:78047247-78054709	3.36343	3.50667	3.47594	2.78271	4.70937	5.10626	4.69763	3.63412	3.28219	4.53684	0.467032	0.0127686
XLOC_006131	Clybl	chr14:122580915-122850368	9.02244	11.56	7.54274	6.21939	13.3601	11.6346	10.0178	12.4952	8.58614	11.8769	0.468079	0.0504496
XLOC_018523	Pnpla2	chr7:148641086-148646642	11.8553	8.95353	10.3091	10.921	16.3217	13.8674	12.6621	15.3098	10.5097	14.5403	0.468326	0.00712411
XLOC_016017	Gak	chr5:108998432-109058758	32.761	32.2505	33.9895	30.4063	42.2663	47.5807	41.9699	47.5138	32.3518	44.8327	0.470703	0.000366298
XLOC_003979	Slc25a19	chr11:115475494-115489609	4.69053	4.03071	3.4566	3.58347	6.29007	5.2134	5.48761	4.85844	3.94033	5.46238	0.471214	0.0102424
XLOC_003448	Flii	chr11:60513191-60540723	19.5387	15.0953	20.2068	18.4664	26.1489	25.902	27.4947	22.1039	18.3268	25.4124	0.471576	0.00471256
XLOC_005931	Abhd4	chr14:54873803-54888844	9.4334	9.13176	9.04125	10.8545	10.9701	13.7594	13.6147	14.9936	9.61523	13.3345	0.471765	0.00769131
XLOC_000245	Dis3l2	chr1:88600378-88946672	3.96435	4.44679	4.59414	5.43447	5.30091	5.9672	7.42432	6.92313	4.60994	6.40389	0.474201	0.0193039
XLOC_002662	Vamp2	chr11:68902029-68905883	7.27725	6.03808	6.59047	6.94716	7.76983	10.4322	9.15467	9.96411	6.71324	9.3302	0.474899	0.00646771
XLOC_022311	Abcd1	chrX:70961935-70983626	2.19498	1.5462	2.41862	1.79252	2.59814	2.46814	3.27112	2.72545	1.98808	2.76571	0.476275	0.0257021
XLOC_022623	Tbc1d25	chrX:7731597-7753307	4.07812	5.28904	3.72468	4.72545	7.16791	5.77913	6.2039	5.63853	4.45432	6.19737	0.47645	0.0118974
XLOC_008336	Uhrf1bp1	chr17:27993451-28036985	12.7216	10.2417	10.8466	11.59	18.0777	14.3034	18.1098	12.721	11.35	15.803	0.477507	0.0226577
XLOC_004746	Ptpn21	chr12:99914950-99975615	8.75256	8.29403	8.72727	9.46092	11.4946	12.3819	14.1571	11.0446	8.8087	12.2696	0.478082	0.00316632
XLOC_009813	Nudt8	chr19:4000579-4002102	10.6742	15.9661	9.51515	10.1761	15.6134	16.7081	17.1366	15.1526	11.5829	16.1527	0.479778	0.025723
XLOC_007446	Clec16a	chr16:10545431-10744971	7.50943	5.38494	5.26776	3.68211	7.91882	6.68544	8.40711	7.49012	5.46106	7.62537	0.481627	0.0466059
XLOC_001638	Gnptab	chr10:87842156-87910074	20.1871	22.0364	21.8857	25.7903	23.0943	30.0107	36.5556	35.9016	22.4749	31.3906	0.482017	0.0373823
XLOC_012692	Ppm1l	chr3:69120839-69359318	4.04212	5.3381	4.74098	6.10298	6.4525	8.31579	6.44713	7.04325	5.05605	7.06467	0.482612	0.017787
XLOC_009878	Bad	chr19:7012559-7026383	7.26799	6.72481	5.97597	5.17798	7.64355	8.96714	10.0964	8.44689	6.28669	8.7885	0.483316	0.0107605
XLOC_007860	Abcc5	chr16:20331376-20426467	28.5417	24.862	26.4132	23.3314	33.272	31.9399	42.4491	36.5968	25.7871	36.0645	0.483929	0.00743006
XLOC_002290	Esyt1	chr10:127947305-127962915	9.08169	6.9179	7.87318	8.19061	13.7513	11.1532	9.35985	10.5821	8.01585	11.2116	0.484067	0.0208493
XLOC_021332	Slc25a20	chr9:108564428-108586972	8.37773	10.1866	7.75464	7.31084	14.2624	9.43001	12.8847	10.6233	8.40745	11.8001	0.489059	0.0358792
XLOC_012366	Gss	chr2:155388918-155418442	14.199	14.2935	13.0206	13.0247	17.084	19.2875	24.0976	16.116	13.6345	19.1463	0.489807	0.0228309
XLOC_018017	Kdelr1	chr7:53128209-53139096	44.1957	51.0565	43.1031	32.8894	58.597	60.9937	73.01	47.9252	42.8112	60.1315	0.490133	0.0346166
XLOC_021585	Tbrg1	chr9:37456766-37464897	124.131	136.36	98.7469	100.271	134.232	183.606	183.137	144.607	114.877	161.395	0.490508	0.025983
XLOC_011159	Mapkbp1	chr2:119798434-119853139	1.45317	1.01651	1.49825	1.59391	2.26273	1.98479	1.77309	1.79667	1.39046	1.95432	0.491104	0.0164252
XLOC_006549	Abcc4	chr14:118881913-119105441	13.2848	13.5264	17.6593	18.6843	21.2583	20.4329	26.809	20.3356	15.7887	22.2089	0.492249	0.0215466
XLOC_021054	Agphd1	chr9:54765096-54797731	6.32837	7.80473	7.46647	6.06571	7.59054	8.85963	10.6932	11.781	6.91632	9.73109	0.492597	0.0335736
XLOC_008486	Trim26	chr17:36974085-36996325	9.46543	11.2752	11.8146	11.3483	13.0514	14.7643	18.8361	15.1688	10.9759	15.4551	0.493751	0.0147207
XLOC_013764	Tdrd7	chr4:46000333-46047631	3.03177	2.8012	2.64676	2.40999	4.2097	4.083	4.04288	3.01032	2.72243	3.83648	0.494886	0.0109694
XLOC_005412	Bloc1s5	chr13:38694574-38726978	3.89614	3.24516	4.82472	4.38043	4.07204	6.4907	6.40443	6.0769	4.08661	5.76102	0.495418	0.0449444
XLOC_005756	Kctd6	chr14:9046661-9056083	8.15684	6.9902	7.19211	5.54583	11.0705	9.51957	9.79758	8.92846	6.97124	9.82903	0.495632	0.00662519
XLOC_001568	Reep6	chr10:79792889-79799186	86.6939	98.0772	78.4252	72.1444	116.182	106.932	140.106	109.598	83.8352	118.205	0.495657	0.0106596
XLOC_007950	Adprh	chr16:38445478-38452769	19.3988	14.3745	15.9437	14.1339	22.4754	22.5857	27.8977	17.1175	15.9627	22.5191	0.496441	0.0401803
XLOC_012451	Sulf2	chr2:165899398-165981183	31.7856	31.7963	26.6416	32.2335	41.6293	41.4582	47.7419	42.1153	30.6142	43.2362	0.498036	0.000758241
XLOC_003301	Rhbdf1	chr11:32109584-32122293	5.29324	3.75335	4.24899	3.47022	6.4024	5.27233	6.0546	5.96042	4.19145	5.92244	0.498742	0.00987744
XLOC_015374	Tmem175	chr5:109058828-109089788	3.30773	4.50904	4.28362	3.31067	4.23726	5.43837	5.94524	6.15615	3.85277	5.44426	0.49884	0.0246271
XLOC_006879	Tuba1c	chr15:98860321-98868536	47.8013	55.7981	57.2376	43.7041	59.986	82.3451	76.4293	70.7193	51.1353	72.3699	0.501071	0.0102085
XLOC_007238	Cyb5r3	chr15:82983931-83002638	47.9113	47.2294	47.2465	47.9057	55.0689	65.7001	69.4429	79.1448	47.5732	67.3392	0.501296	0.00736863
XLOC_021078	Ulk3	chr9:57437258-57444040	6.00935	6.25384	4.17781	3.44103	7.0662	7.34183	5.71005	8.02671	4.97051	7.0362	0.501403	0.0497646
XLOC_012363	Ncoa6	chr2:155216391-155266519	14.6936	11.6561	12.1992	15.9875	14.4928	20.9139	18.9263	22.9778	13.6341	19.3277	0.50345	0.0339656
XLOC_003528	Slc16a13	chr11:70030293-70034496	30.3615	34.2309	30.4196	21.3024	44.8126	37.8879	49.5812	32.6469	29.0786	41.2322	0.503812	0.0394946
XLOC_009786	Nfatc1	chr18:80802943-80909810	3.03348	2.95574	3.42354	3.08791	4.41365	4.18741	4.47525	4.65526	3.12517	4.43289	0.504315	8.97102e-05
XLOC_010218	Ccs	chr19:4825365-4839322	21.4998	22.1131	17.9287	14.3507	24.054	28.6139	30.426	24.7072	18.9731	26.9503	0.506346	0.0149169
XLOC_002057	Pdxk	chr10:77899491-77927693	11.4391	9.12639	9.36394	7.5414	15.4666	14.6815	12.6481	10.4669	9.36771	13.3158	0.507368	0.0284954
XLOC_000194	Bcs1l	chr1:74634934-74639017	7.64086	6.18632	9.86016	9.46337	9.88132	11.4288	12.3902	13.4273	8.28768	11.7819	0.507533	0.0218248
XLOC_014121	E130218I03Rik	chr4:133799220-133801788	4.16456	6.59173	4.60212	3.94099	6.18947	5.8581	7.6125	7.81675	4.82485	6.86921	0.509659	0.0397496
XLOC_019653	Nadsyn1	chr7:150981498-151008746	4.23562	5.32405	3.24007	3.75525	5.85578	5.9572	6.33375	5.42619	4.13875	5.89323	0.509864	0.0108248
XLOC_003986	Wbp2	chr11:115939886-115948278	37.9309	33.4666	37.1937	28.314	51.9128	40.752	55.6129	46.8569	34.2263	48.7837	0.511292	0.00972871
XLOC_020720	Aprt	chr8:125098536-125100807	198.801	241.397	200.454	153.375	233.435	287.524	304.314	309.603	198.507	283.719	0.515275	0.0144152
XLOC_001750	F420014N23Rik	chr10:126627433-126648678	1.68657	0.857512	1.23587	1.07704	1.93118	1.80926	1.67762	1.52736	1.21425	1.73635	0.515999	0.037197
XLOC_001844	Utrn	chr10:12101985-12581533	7.65181	7.64769	9.95881	11.1496	11.8823	12.576	13.9579	13.6535	9.10198	13.0174	0.516192	0.00772154
XLOC_017854	Sirt2	chr7:29551770-29573684	18.1273	21.2069	16.7501	16.3098	21.4348	25.2903	28.9259	28.2334	18.0985	25.9711	0.521035	0.00823326
XLOC_005793	Anxa11	chr14:26661640-26706290	15.6396	10.3566	15.0861	11.9903	18.3777	20.8851	21.5987	15.3509	13.2682	19.0531	0.522059	0.0223769
XLOC_008436	Neu1	chr17:35068197-35074242	15.8948	21.7992	19.6647	14.0508	22.9274	23.1342	33.1012	23.4318	17.8524	25.6486	0.522767	0.042931
XLOC_021381	Osbpl10	chr9:114976396-115141341	6.51585	7.57958	7.75686	8.04439	9.04981	10.3822	12.9925	10.5536	7.47417	10.7445	0.523617	0.0102133
XLOC_013419	Pde4dip	chr3:97493751-97692630	9.79376	10.1304	10.4518	13.1504	10.8779	17.8738	17.4693	16.3811	10.8816	15.6505	0.524322	0.0376475
XLOC_003922	Tex2	chr11:106363452-106474244	14.1304	14.1923	13.1443	13.8644	18.067	19.7027	21.6514	20.1663	13.8329	19.8969	0.524442	0.00023205
XLOC_005000	Rreb1	chr13:37917906-38043874	16.9437	17.9853	14.2802	16.544	25.7707	22.3808	21.0774	25.4421	16.4383	23.6677	0.525861	0.0020279
XLOC_019782	Ppapdc1b	chr8:26830519-26835359	7.41925	10.5586	9.31033	7.67961	9.99804	10.5827	14.6577	15.1781	8.74195	12.6041	0.52787	0.0453824
XLOC_005789	Zmiz1	chr14:26278670-26486233	24.6617	21.7496	20.5618	22.1799	32.2791	32.9525	30.8336	32.4939	22.2883	32.1398	0.528076	5.48655e-05
XLOC_019950	Sin3b	chr8:75247186-75282102	41.1438	36.7816	36.3028	31.5457	47.2047	69.1455	42.7518	51.3012	36.4435	52.6008	0.529424	0.0382788
XLOC_009216	Fez2	chr17:78777224-78817443	11.4714	14.0092	14.2171	13.2736	15.2805	19.4519	20.3636	21.3747	13.2428	19.1177	0.529696	0.00729043
XLOC_013600	Cyr61	chr3:145309934-145312949	8.68104	9.78574	9.79843	11.5436	18.7954	13.2058	10.9763	14.5472	9.9522	14.3812	0.531094	0.0444991
XLOC_013559	Hadh	chr3:130936341-130974955	82.4049	102.275	97.9521	79.5831	102.861	125.807	166.581	128.486	90.5538	130.934	0.53199	0.0305719
XLOC_004826	Akt1	chr12:113892031-113912487	44.6238	33.1969	31.7755	33.978	53.8909	62.3541	55.157	36.2203	35.8936	51.9056	0.532165	0.0435989
XLOC_003168	Baiap2	chr11:119804405-119868096	5.96368	4.59875	3.10287	4.54115	7.48895	7.15142	6.33215	5.37343	4.55161	6.58649	0.533132	0.0350979
XLOC_017664	Kptn	chr7:16705224-16712865	6.46449	4.26785	4.04807	4.03778	6.61582	5.92429	7.46128	7.23735	4.70455	6.80968	0.533532	0.0215625
XLOC_007060	Mtss1	chr15:58772788-58913581	10.9643	9.65547	12.5453	15.0807	18.5906	17.1211	18.0408	16.1722	12.0614	17.4812	0.5354	0.00551971
XLOC_021927	Glyctk	chr9:106055190-106060469	5.64801	5.06309	5.42135	4.27016	8.31435	6.95793	9.14526	5.17789	5.10065	7.39886	0.536621	0.0462784
XLOC_000736	Tgfbrap1	chr1:43104113-43155467	10.0219	10.6119	12.116	10.4623	12.1344	14.9887	17.6578	18.0325	10.803	15.7034	0.539637	0.0145598
XLOC_019668	Mcoln1	chr8:3500518-3515231	19.7281	19.9224	20.8855	17.8901	24.9862	24.5454	35.1786	29.3473	19.6065	28.5144	0.540356	0.0129222
XLOC_007723	Ifngr2	chr16:91547338-91564252	4.75543	5.4784	4.37713	3.78982	5.4032	7.93347	5.85512	7.60933	4.60019	6.70028	0.542526	0.0269461
XLOC_023002	Morc4	chrX:136356173-136406193	72.9333	73.6419	92.8126	112.456	134.415	102.24	129.645	146.277	87.9609	128.144	0.542834	0.0227852
XLOC_012739	0610031J06Rik	chr3:88128944-88132553	51.1234	53.0918	55.3222	37.9437	65.5445	63.74	95.8629	62.837	49.3703	71.9961	0.544276	0.0436077
XLOC_018727	Cblc	chr7:20365066-20382158	1.39718	2.09587	1.64394	1.47565	2.06848	2.73361	2.79147	2.05067	1.65316	2.41106	0.54444	0.0254303
XLOC_002732	Tax1bp3	chr11:72990584-72995548	17.618	23.7549	19.3561	13.8057	25.498	31.585	27.5757	24.0755	18.6337	27.1836	0.544822	0.0174957
XLOC_014007	Slc2a1	chr4:118781349-118809934	289.153	184.365	208.097	205.17	292.967	336.623	337.728	326.529	221.696	323.462	0.545011	0.00701702
XLOC_017024	3110062M04Rik	chr6:34813145-34828065	2.2901	2.93486	3.2769	1.96656	3.57584	3.93185	3.74097	4.03395	2.6171	3.82065	0.545847	0.00875075
XLOC_020104	Fam65a	chr8:108129128-108146118	6.40856	5.50136	6.64656	6.63678	10.2374	9.89291	8.26876	8.44005	6.29832	9.20978	0.548201	0.00218317
XLOC_001226	Marc2	chr1:186636946-186669726	15.5954	19.0771	17.5382	13.8803	19.0333	25.2066	28.0033	24.526	16.5228	24.1923	0.550094	0.0128529
XLOC_000979	Pfkfb2	chr1:132585619-132625830	3.84663	3.77322	5.30256	4.23639	4.39549	6.68717	7.83863	6.2227	4.2897	6.286	0.551265	0.0464237
XLOC_022489	Nrk	chrX:135448968-135543629	48.9715	63.8429	69.2767	58.6376	65.3335	96.5495	106.038	84.8455	60.1822	88.1916	0.551305	0.0285797
XLOC_022552	Ubqln2	chrX:149932774-149936101	80.6501	70.7612	80.4867	101.32	92.6586	119.091	141.059	135.857	83.3045	122.166	0.552381	0.021909
XLOC_019150	Cib1	chr7:87372045-87377502	28.9209	40.8278	32.454	22.0534	40.6559	45.0102	40.4262	56.2305	31.064	45.5807	0.553178	0.03571
XLOC_015106	Slc35f6	chr5:30950311-30962102	12.8332	17.55	17.3313	13.3698	19.9025	20.8102	28.7692	20.2319	15.2711	22.4284	0.554528	0.0272845
XLOC_013742	Tmem8b	chr4:43681842-43705539	1.16023	1.44869	1.42217	0.79113	1.60408	2.21482	1.72002	1.54395	1.20556	1.77072	0.554637	0.0396427
XLOC_015948	Naaa	chr5:92686685-92707207	7.47599	11.1609	10.2186	8.34129	11.8117	13.1783	17.1626	12.51	9.2992	13.6657	0.555376	0.0246885
XLOC_005444	1110007C09Rik	chr13:49298319-49311395	25.4973	26.1487	17.7011	15.4607	27.1603	36.356	30.6193	30.5054	21.202	31.1602	0.55551	0.0238788
XLOC_020540	Ccdc130	chr8:86781693-86794259	1.95438	2.05352	1.64619	2.10309	1.88892	3.30563	3.26659	2.94085	1.93929	2.8505	0.555681	0.0389944
XLOC_019955	Tom1	chr8:77557584-77594020	22.6065	24.9093	23.8809	19.6157	29.6618	30.2316	38.7439	35.2547	22.7531	33.473	0.556935	0.00465184
XLOC_005676	Pik3r1	chr13:102450717-102538172	7.86909	7.5114	8.08779	8.74522	9.20856	12.1141	11.4661	14.6311	8.05337	11.855	0.557826	0.0160094
XLOC_013651	Trp53inp1	chr4:11083587-11101524	6.19513	9.9624	10.6126	9.30016	11.0828	12.8432	13.3547	15.8425	9.01757	13.2808	0.558531	0.0218161
XLOC_008875	Bak1	chr17:27154979-27173323	18.556	21.2543	23.7797	12.9671	27.5739	29.0233	22.9921	33.1884	19.1393	28.1944	0.558874	0.0275652
XLOC_011713	Crat	chr2:30247935-30271268	6.05021	7.44879	6.68578	6.80814	9.78261	9.33894	10.9633	9.71188	6.74823	9.94918	0.560069	0.000405917
XLOC_017795	Zfp526	chr7:26006469-26012524	2.85067	2.99525	3.94228	3.36289	5.44062	4.24017	5.55361	4.16169	3.28777	4.84902	0.560583	0.012969
XLOC_001592	Pip5k1c	chr10:80755716-80782719	45.4078	40.5114	41.188	42.1286	60.648	58.9187	77.4574	52.7069	42.309	62.4327	0.56134	0.00977975
XLOC_012490	Ctsz	chr2:174241304-174264493	231.253	221.405	210.354	173.934	248.791	271.314	398.338	317.861	209.237	309.076	0.562827	0.030145
XLOC_005752	Flnb	chr14:8650470-8784101	58.9488	47.4095	52.599	51.7102	82.6788	82.1352	78.8505	67.5277	52.6669	77.798	0.562838	0.00104721
XLOC_012295	Rrbp1	chr2:143773130-143836999	88.4531	93.7489	91.1153	66.4584	113.015	140.801	132.896	115.239	84.9439	125.488	0.562964	0.00457627
XLOC_020474	Mpv17l2	chr8:73278577-73284820	11.5538	9.23347	10.8576	8.09805	13.723	13.7483	14.5033	16.7715	9.93573	14.6865	0.563795	0.00421698
XLOC_008678	Plekhh2	chr17:84911234-85021482	1.07893	1.11191	1.22565	1.17066	1.67119	1.90665	1.35263	1.85027	1.14679	1.69518	0.563845	0.00534863
XLOC_020744	Sipa1l2	chr8:127941962-128016610	12.6842	12.2462	12.9274	14.5479	20.4552	17.4027	25.663	13.9794	13.1014	19.3751	0.564478	0.0477466
XLOC_021458	Endod1	chr9:14158433-14185686	0.750081	0.861626	0.761848	0.931205	1.24639	1.13415	1.17231	1.34661	0.82619	1.22486	0.568077	0.000763713
XLOC_004086	Hs1bp3	chr12:8320238-8350630	11.8542	13.0551	12.171	11.0621	17.6913	14.0785	21.279	18.4265	12.0356	17.8688	0.570137	0.00903827
XLOC_003463	Ulk2	chr11:61589099-61668594	2.04636	1.88965	1.42638	1.706	2.44358	2.39015	3.37075	2.31378	1.7671	2.62956	0.573443	0.0222491
XLOC_012457	B4galt5	chr2:167123944-167174678	28.3593	34.8173	33.8495	25.9319	42.4386	43.2937	58.3884	38.9374	30.7395	45.7645	0.574136	0.0205738
XLOC_006373	Cideb	chr14:56364529-56377261	14.8122	16.0725	13.4634	9.32799	18.5758	18.3209	22.0784	20.9395	13.419	19.9786	0.57418	0.00897381
XLOC_011383	Acss2	chr2:155343778-155388479	2.05282	2.4149	2.71892	2.18396	3.14517	3.35876	4.42239	3.02697	2.34265	3.48832	0.574392	0.0171014
XLOC_008815	Ntn3	chr17:24312375-24346332	3.54238	3.09226	2.88642	2.79028	3.88587	4.57742	5.61921	4.26089	3.07784	4.58585	0.575272	0.0101489
XLOC_016070	Git2	chr5:115177416-115223501	7.47873	8.11055	6.74693	7.35073	10.9605	11.3278	11.086	10.9008	7.42173	11.0688	0.576667	1.71419e-05
XLOC_018656	Chmp2a	chr7:13617354-13620126	36.5623	44.5169	45.6498	42.5498	50.4998	69.2745	51.3448	81.6605	42.3197	63.1949	0.578479	0.036588
XLOC_015392	Ttc28	chr5:111308821-111718799	1.77876	1.08406	1.41111	1.26721	1.91556	1.78658	2.63144	1.94456	1.38529	2.06954	0.579124	0.029465
XLOC_009550	Zadh2	chr18:84257549-84266906	2.34782	3.14917	2.32493	2.20356	2.91772	3.23745	4.12667	4.71689	2.50637	3.74968	0.581169	0.0368499
XLOC_013997	Elovl1	chr4:118100697-118109948	25.547	32.3216	25.9468	21.2018	33.9225	39.9788	38.892	44.5299	26.2543	39.3308	0.583106	0.00609136
XLOC_000205	Dnajb2	chr1:75232997-75242267	4.2308	3.75762	2.99597	2.24637	5.91251	5.40394	4.41643	4.1065	3.30769	4.95984	0.584471	0.0343473
XLOC_011631	Arrdc1	chr2:24780871-24790801	4.99723	7.13905	5.81653	5.24039	10.1075	10.2565	7.41676	7.08938	5.7983	8.71753	0.58829	0.0241378
XLOC_019232	Dgat2	chr7:106302172-106331223	45.3344	46.3896	46.3535	30.1733	57.4518	58.3025	81.2695	55.9408	42.0627	63.2411	0.588322	0.0261646
XLOC_019178	9930013L23Rik	chr7:91081366-91235015	1.43039	1.75645	1.50371	1.36531	1.95304	1.9847	3.03538	2.13773	1.51397	2.27771	0.589254	0.0298888
XLOC_010772	Ciz1	chr2:32218529-32233833	10.1906	9.65495	6.78566	8.95295	11.7519	13.0971	12.4239	16.2927	8.89604	13.3914	0.590072	0.0115319
XLOC_006718	Grina	chr15:76077236-76080334	6.80552	7.04053	6.94758	4.88203	8.91946	10.6347	11.2899	7.80869	6.41892	9.66319	0.59017	0.0140371
XLOC_004007	Tmc6	chr11:117627298-117641997	4.18982	3.23548	3.87456	2.51492	4.48682	5.47408	6.03581	4.81804	3.45369	5.20369	0.591394	0.0135262
XLOC_004053	Rfng	chr11:120642058-120645518	8.25707	7.00612	5.63215	6.28663	9.84111	11.1124	8.42324	11.59	6.79549	10.2417	0.591803	0.00890069
XLOC_014668	Plk3	chr4:116799417-116806557	5.02806	3.73438	3.02056	3.73862	6.81543	5.88218	5.92721	4.78116	3.8804	5.85149	0.592598	0.0156122
XLOC_020118	Pla2g15	chr8:108674298-108688615	9.58924	8.11303	7.23237	6.59976	9.72687	13.6502	14.4582	9.71999	7.8836	11.8888	0.592678	0.0301441
XLOC_008880	AI413582	chr17:27700713-27702672	7.0362	12.3103	14.0119	9.10733	13.5465	16.6437	18.608	15.2607	10.6164	16.0147	0.5931	0.0294633
XLOC_000405	Lad1	chr1:137715174-137729918	26.1186	17.6358	21.7464	21.5796	33.4106	38.7739	33.01	26.1975	21.7701	32.848	0.593457	0.0118236
XLOC_002677	G630025P09Rik	chr11:69617096-69619540	2.81631	3.15042	3.36806	2.34734	4.32287	4.65277	4.94416	3.72503	2.92053	4.41121	0.594942	0.00485813
XLOC_007352	Lima1	chr15:99608898-99705887	20.8207	21.0713	23.9141	21.394	20.7623	34.6021	40.429	36.4066	21.8	33.05	0.60032	0.0408427
XLOC_008668	Galm	chr17:80526810-80584372	12.2083	15.2325	15.0764	12.0458	16.138	18.1038	27.373	21.1104	13.6408	20.6813	0.600404	0.0354531
XLOC_003855	Stat3	chr11:100748123-100800825	13.4959	18.5643	15.4662	12.7111	19.3389	20.4676	30.9574	20.6729	15.0594	22.8592	0.602113	0.0412456
XLOC_015544	Mlxipl	chr5:135582760-135614252	3.48294	2.06403	2.8507	2.33476	4.04526	4.19435	3.87314	4.1835	2.68311	4.07406	0.602563	0.00494514
XLOC_014170	Tmco4	chr4:138528819-138615086	1.53304	1.47656	1.66861	1.80664	2.51816	2.32369	2.12359	2.8886	1.62121	2.46351	0.603642	0.00329905
XLOC_002679	Plscr3	chr11:69659873-69672232	4.62115	3.91781	4.82019	4.7291	6.22289	6.85757	7.40767	7.00385	4.52206	6.87299	0.603958	0.000328143
XLOC_010944	Ube2l6	chr2:84638984-84650160	2.71251	5.34129	2.63926	3.71206	5.2401	4.98916	5.53852	6.13261	3.60128	5.4751	0.604375	0.0323327
XLOC_001013	Rnpep	chr1:137159275-137180661	64.4106	53.4305	53.0513	49.6599	78.0232	77.1817	96.6933	83.7231	55.1381	83.9053	0.605713	0.0020062
XLOC_003256	Cobl	chr11:12136678-12364963	1.41028	1.20149	0.991483	1.41072	1.32448	1.89072	2.34846	2.06924	1.25349	1.90823	0.606277	0.0334026
XLOC_014061	AU040320	chr4:126430798-126645167	4.5842	5.11236	4.23151	5.0225	6.63353	6.12604	9.60166	6.50467	4.73764	7.21647	0.607125	0.0241962
XLOC_020934	Vwa5a	chr9:38525852-38550922	2.2761	4.39367	2.69211	3.70231	5.90918	5.23333	4.7309	4.0518	3.26605	4.9813	0.608977	0.0326952
XLOC_004118	Klf11	chr12:25336235-25347647	3.48012	3.49077	4.21466	3.86287	3.82838	6.03806	7.20624	5.89528	3.76211	5.74199	0.610011	0.0339277
XLOC_021343	Shisa5	chr9:108941140-108960280	10.1231	16.0239	9.99379	8.50283	15.3519	18.6225	20.0139	14.1656	11.1609	17.0385	0.610342	0.0341759
XLOC_010718	Rxra	chr2:27532720-27618839	12.4856	8.01155	10.7774	8.70562	15.6489	15.6511	18.3272	11.4119	9.99504	15.2598	0.610449	0.0239768
XLOC_022608	2010204K13Rik	chrX:6988942-7000114	37.0055	40.2087	44.6586	26.0044	48.6367	66.7071	64.7711	45.7142	36.9693	56.4573	0.610832	0.0272109
XLOC_002409	Fam161a	chr11:22913386-22923741	0.983645	0.800739	0.727618	0.710397	1.1613	0.997411	1.0723	1.6999	0.8056	1.23273	0.613719	0.0467641
XLOC_011781	Dennd1a	chr2:37631768-38142904	4.8097	4.8323	4.65405	5.15704	5.51237	7.54758	8.53148	8.20395	4.86327	7.44885	0.615089	0.00925795
XLOC_019620	Gm16982	chr7:148748078-148818910	3.09319	2.48412	2.70003	2.67426	4.30724	4.52028	4.55548	3.39202	2.7379	4.19375	0.615173	0.00290368
XLOC_010779	Ak1	chr2:32477277-32490578	9.5667	9.71926	11.3994	12.2036	21.2135	15.4364	13.5479	15.6498	10.7222	16.4619	0.618525	0.0177978
XLOC_019270	Trim21	chr7:109706435-109713983	1.47107	1.15424	1.94194	2.21291	2.34103	2.51568	2.91323	2.64182	1.69504	2.60294	0.618823	0.0141473
XLOC_022342	Tmem47	chrX:78315982-78343214	7.75611	12.4591	9.42043	15.4418	13.87	18.7147	16.0257	20.6406	11.2694	17.3128	0.619429	0.0366594
XLOC_015627	Daglb	chr5:144225360-144265310	4.41473	2.21004	4.00343	2.71428	5.18958	4.98798	5.91465	4.41037	3.33562	5.12565	0.619779	0.0256388
XLOC_020527	Cd97	chr8:86239075-86265210	1.63133	1.39901	1.68509	1.4282	2.2975	3.11706	1.59465	2.43415	1.53591	2.36084	0.620209	0.0419579
XLOC_020695	Hsdl1	chr8:122085877-122099100	7.84619	7.75584	8.75064	8.78325	12.4283	11.5558	16.6155	10.401	8.28398	12.7501	0.622118	0.0178856
XLOC_013913	Ppap2b	chr4:104829951-104905372	6.46053	6.35663	9.26307	7.58582	11.1275	11.685	11.0496	11.8823	7.41651	11.4361	0.624782	0.00126779
XLOC_022297	Zfp185	chrX:70232677-70276882	3.9398	6.11064	4.75185	4.44517	4.73016	7.96968	8.92137	8.08648	4.81187	7.42692	0.626168	0.0446824
XLOC_010110	Sema4g	chr19:45063833-45077885	5.74407	5.91247	6.63818	4.60293	8.16153	7.47786	11.3805	8.36612	5.72441	8.8465	0.62798	0.0176231
XLOC_004228	Slc38a6	chr12:74387834-74455032	9.27752	8.24161	9.93304	9.07895	9.81445	16.3193	13.8853	16.539	9.13278	14.1395	0.630606	0.0203692
XLOC_008379	Cyp4f16	chr17:32673573-32688742	3.03925	3.36501	4.87301	2.65424	5.95818	5.66625	5.74053	4.20573	3.48288	5.39267	0.630721	0.0229755
XLOC_015796	Lrpap1	chr5:35434154-35448346	48.507	66.57	63.0885	48.4341	59.8191	88.4393	112.565	90.0468	56.6499	87.7176	0.630792	0.0390937
XLOC_008813	Amdhd2	chr17:24292799-24300700	15.8532	16.436	16.8896	11.9694	28.3882	18.1568	28.0824	20.1626	15.2871	23.6975	0.632425	0.0266758
XLOC_000612	Ptpn14	chr1:191552146-191700572	11.9946	10.1745	10.1144	10.8998	19.9239	16.5954	15.2987	15.1955	10.7958	16.7534	0.633978	0.00241031
XLOC_001719	Cpm	chr10:117066555-117124408	4.17543	5.40231	5.12249	6.06537	7.34503	6.30469	8.26047	10.3324	5.1914	8.06065	0.634772	0.022602
XLOC_011840	Lrp2	chr2:69262391-69424124	83.0604	87.2568	62.8064	91.4947	99.1027	116.713	167.877	120.656	81.1546	126.087	0.635677	0.0309067
XLOC_021394	Xylb	chr9:119266498-119302915	3.74179	4.5063	3.92612	3.44731	5.44339	5.92373	5.80746	7.10864	3.90538	6.07081	0.636425	0.00221242
XLOC_002005	Arid5b	chr10:67558340-67741474	10.3912	8.46456	12.7072	11.9657	12.9368	15.8034	17.567	21.4859	10.8822	16.9483	0.639173	0.023916
XLOC_007254	5031439G07Rik	chr15:84776149-84818401	14.9201	13.2829	11.361	10.8568	19.6709	20.3995	20.6312	17.8677	12.6052	19.6423	0.639947	0.000765791
XLOC_000673	Tram2	chr1:20991477-21069306	11.5859	9.89507	8.27592	9.09759	10.9573	16.9333	17.5125	15.157	9.71362	15.14	0.640287	0.0162807
XLOC_009834	B3gnt1	chr19:5038825-5041134	9.88338	7.81511	9.99992	6.95677	13.8608	12.3428	17.9047	10.0079	8.6638	13.529	0.64299	0.0372323
XLOC_013070	Slc44a5	chr3:153636399-153934684	1.5618	2.23907	2.05472	0.998514	3.26839	2.53209	2.88256	2.03425	1.71353	2.67932	0.6449	0.0448669
XLOC_020986	Mcam	chr9:43942740-43950809	0.878947	1.02358	1.10431	0.966695	1.67102	1.34661	1.35808	1.84236	0.993383	1.55452	0.646045	0.0051464
XLOC_018950	Plekhf1	chr7:39005672-39013013	4.95688	6.99047	5.50349	4.14466	8.37227	7.00383	10.8378	7.6005	5.39888	8.4536	0.646907	0.0254837
XLOC_021549	St14	chr9:30896174-30939384	12.5221	13.0639	13.3963	14.3867	19.1514	20.8868	19.3155	24.2892	13.3422	20.9107	0.648241	0.00093884
XLOC_019621	Muc6	chr7:148819947-148841207	0.831458	1.17264	0.984859	0.888079	1.33266	1.63807	1.60496	1.50825	0.969259	1.52099	0.650052	0.00160711
XLOC_007188	Tmem184b	chr15:79191113-79233733	8.75158	5.75985	6.96936	6.58286	12.9742	10.0754	11.6507	9.36589	7.01591	11.0165	0.65097	0.00798061
XLOC_007963	Zdhhc23	chr16:43969258-43979163	2.137	1.6319	2.09516	2.0809	4.09886	3.22815	2.05096	3.09922	1.98624	3.1193	0.651181	0.0407644
XLOC_016921	Rassf8	chr6:145756902-145766104	9.73547	9.95871	10.4285	8.01409	13.0669	16.2705	12.6659	17.8959	9.53419	14.9748	0.651354	0.00734994
XLOC_010274	Dnajc4	chr19:7062400-7066762	4.19287	3.0894	4.55493	3.52649	6.7864	4.89487	5.4329	7.02214	3.84092	6.03408	0.65168	0.0116167
XLOC_002550	Slc36a1	chr11:55017841-55049832	9.94908	7.02056	9.88852	7.19016	11.6166	12.3893	18.519	10.9668	8.51208	13.3729	0.651731	0.0446099
XLOC_001220	Capn2	chr1:184397389-184447614	16.3857	16.1516	15.7002	12.9883	16.1243	26.5264	26.4434	27.129	15.3065	24.0558	0.652244	0.0193832
XLOC_018002	Gys1	chr7:52690208-52711987	16.8077	11.3147	13.718	9.82975	19.5625	20.427	24.1983	17.0924	12.9175	20.32	0.653573	0.0129499
XLOC_010775	Fam102a	chr2:32390878-32425270	8.50386	7.21076	7.17761	5.96207	11.0094	12.4449	12.6019	9.35595	7.21357	11.353	0.654292	0.00404268
XLOC_017034	Creb3l2	chr6:37281020-37392148	4.6218	7.41136	6.53658	4.67191	7.85938	9.82181	11.3364	7.59833	5.81041	9.15398	0.655759	0.0246293
XLOC_009717	Ppargc1b	chr18:61457789-61560085	3.51116	2.63341	2.99747	3.00819	4.53566	4.92417	4.9418	4.7547	3.03756	4.78908	0.656838	0.000135409
XLOC_001349	Ptprk	chr10:27794625-28317203	17.1852	19.834	21.6828	23.8176	23.9307	30.372	30.9404	44.9001	20.6299	32.5358	0.657291	0.042444
XLOC_002149	Dram1	chr10:87785548-87819820	5.93123	10.4537	6.97826	7.78169	8.55764	11.9274	15.2679	13.3881	7.78622	12.2853	0.657933	0.0395076
XLOC_005277	Gpr137b	chr13:13449887-13485891	3.83003	3.80299	2.66606	2.6443	4.34031	5.26507	6.04826	4.77306	3.23584	5.10668	0.658242	0.00932013
XLOC_003187	Tex19.1	chr11:121007456-121009627	21.0475	19.9938	21.0102	17.8846	35.8761	38.0768	24.2967	27.9072	19.984	31.5392	0.658299	0.013456
XLOC_017257	Rab43	chr6:87738846-87761773	1.43506	2.36098	1.50275	1.39321	2.60802	2.92719	2.75446	2.27891	1.673	2.64214	0.659272	0.0112116
XLOC_000403	Phlda3	chr1:137662661-137665711	8.31841	6.05909	8.16753	8.551	13.0233	14.2605	11.0184	10.9516	7.77401	12.3134	0.663505	0.00379693
XLOC_013477	4933431E20Rik	chr3:107680147-107701603	0.903395	1.27299	1.23233	0.978512	1.51817	1.52707	1.97907	1.92898	1.09681	1.73832	0.664386	0.00608247
XLOC_007781	Emp2	chr16:10281841-10314061	0.94512	1.75189	1.97432	1.23253	1.58787	2.81896	2.42144	2.55117	1.47596	2.34486	0.667843	0.0499254
XLOC_014802	Sesn2	chr4:132048721-132066371	18.6204	15.2439	16.7742	13.4311	30.3206	23.1638	30.0828	18.3427	16.0174	25.4775	0.669582	0.0225557
XLOC_020168	Bcmo1	chr8:119619764-119657620	3.40651	4.75745	4.51401	2.8416	4.9463	5.71821	7.55083	6.48712	3.87989	6.17562	0.670566	0.0186418
XLOC_006047	Reep4	chr14:70945057-70948742	17.4882	21.0009	21.718	17.3497	36.053	28.0971	36.5209	22.806	19.3892	30.8692	0.670917	0.0168944
XLOC_005014	Phactr1	chr13:42775991-43233881	2.06106	2.67658	2.66577	2.35567	2.68445	4.73569	4.66971	3.47286	2.43977	3.89068	0.673276	0.0309144
XLOC_006360	Ap1g2	chr14:55713620-55725430	5.59469	3.62025	3.74288	5.14156	5.73938	6.36235	9.77915	7.06298	4.52485	7.23596	0.677317	0.0374689
XLOC_019956	Hmox1	chr8:77617516-77624492	43.5529	36.909	37.0191	29.5451	45.2649	79.0065	46.8857	64.3492	36.7565	58.8766	0.679693	0.0401676
XLOC_008887	Tead3	chr17:28468617-28487750	7.48856	6.19423	7.40606	7.63645	12.9179	10.3096	12.878	9.96775	7.18133	11.5183	0.681607	0.00243256
XLOC_020567	Zfp423	chr8:90185708-90483494	6.68349	6.25546	6.33214	9.62895	15.8039	9.58399	10.8709	10.106	7.22501	11.5912	0.681958	0.0374798
XLOC_006353	Slc22a17	chr14:55525563-55531969	6.49234	4.23988	3.3825	4.42915	8.86383	7.43253	7.44084	6.09015	4.63597	7.45684	0.685693	0.0175649
XLOC_011055	Pex16	chr2:92214832-92221377	8.24667	8.42334	6.61301	5.25662	12.4647	10.8811	11.8252	10.8241	7.13491	11.4988	0.688513	0.00208858
XLOC_009587	Kctd1	chr18:15127193-15309955	2.41415	2.28693	2.06952	3.26547	4.85172	3.06314	3.36676	4.91414	2.50902	4.04894	0.690422	0.0315489
XLOC_013247	Tmem144	chr3:79617074-79646584	7.62987	12.9841	11.4571	13.2243	11.9909	19.1842	24.4103	17.6684	11.3238	18.3134	0.69354	0.0503707
XLOC_001776	Gls2	chr10:127631690-127648850	5.97063	5.27807	5.99496	6.43394	7.26705	10.6337	8.13565	12.3259	5.9194	9.59058	0.696166	0.0209695
XLOC_006865	Slc48a1	chr15:97614795-97674933	2.52319	3.11345	2.99765	2.53991	5.14905	3.87283	4.30685	4.78248	2.79355	4.5278	0.696711	0.00157052
XLOC_012755	Gba	chr3:89006849-89012603	15.8843	18.9315	18.5791	14.5294	19.8803	27.4682	27.5422	35.3428	16.9811	27.5584	0.698563	0.019182
XLOC_016334	Peg10	chr6:4697305-4710516	258.619	205.566	227.609	209.343	288.588	354.125	423.503	396.362	225.284	365.644	0.698695	0.00448855
XLOC_003150	Syngr2	chr11:117670980-117675600	42.5618	39.5206	29.9674	30.685	62.315	53.9994	62.7233	52.7688	35.6837	57.9516	0.699584	0.00166233
XLOC_013263	Fhdc1	chr3:84246117-84284361	2.45203	2.91854	1.98058	1.68912	3.55108	4.31851	4.13173	2.71854	2.26007	3.67997	0.703326	0.0196377
XLOC_001849	Phactr2	chr10:12927522-13194202	0.485924	0.828081	0.902378	0.607636	0.766882	1.40432	1.18166	1.24562	0.706005	1.14962	0.703408	0.0374087
XLOC_011130	Thbs1	chr2:117937657-117952869	1.03335	0.781781	0.794129	0.775897	1.16542	1.60105	1.29801	1.4537	0.846289	1.37954	0.70497	0.00329557
XLOC_012866	Txnip	chr3:96359690-96370724	4.50752	6.27152	5.28354	6.04875	7.58824	10.1035	8.94463	9.47061	5.52783	9.02675	0.707492	0.001945
XLOC_015851	Arap2	chr5:62993684-63157416	2.93447	3.36851	3.30676	3.83817	3.46425	6.81901	4.93082	6.75655	3.36198	5.49266	0.708194	0.0419032
XLOC_002771	Myo1c	chr11:75465010-75488136	18.0085	13.8964	17.5849	16.6014	21.7924	35.3706	29.4316	21.7642	16.5228	27.0897	0.713286	0.0215043
XLOC_014009	Lepre1	chr4:118905519-118921582	9.39627	9.00784	8.10083	7.4426	13.775	11.8893	19.2977	10.6973	8.48688	13.9148	0.713316	0.0320498
XLOC_011639	Gm757	chr2:25089995-25092307	1.23271	2.17615	2.25879	1.44542	2.48508	2.73355	3.76002	2.68769	1.77827	2.91658	0.713808	0.0254582
XLOC_003507	Cd68	chr11:69477872-69479564	1.42432	1.60499	1.54968	1.01323	2.06563	2.44652	1.65685	3.01655	1.39805	2.29639	0.715945	0.0303669
XLOC_016432	Adck2	chr6:39523874-39538768	1.90639	2.27566	1.03579	1.55868	2.27947	2.85697	3.38235	2.62583	1.69413	2.78616	0.717731	0.0208028
XLOC_018943	Rgs9bp	chr7:36364012-36370601	0.92627	0.627486	0.661467	0.823957	1.36618	1.27116	1.17694	1.19786	0.759795	1.25304	0.721745	0.000960625
XLOC_000292	Rnpepl1	chr1:94807401-94817162	23.4982	18.1898	22.586	19.4922	37.5469	28.051	48.2481	24.3435	20.9415	34.5474	0.722208	0.0479742
XLOC_014194	AI507597	chr4:141170147-141174548	6.66241	3.231	3.39473	2.81512	7.48019	5.86677	7.04495	6.18278	4.02581	6.64367	0.7227	0.0346908
XLOC_020507	Arhgap10	chr8:79774264-80042477	11.5623	13.5606	12.752	13.1185	15.7178	24.896	20.8565	22.7029	12.7484	21.0433	0.72305	0.00608546
XLOC_018840	Pld3	chr7:28317036-28338131	9.76524	12.2277	12.9892	9.52449	17.012	14.5659	21.9701	19.9438	11.1267	18.3729	0.723563	0.00773739
XLOC_005997	Fam124a	chr14:63174573-63227322	0.243329	0.98759	0.775308	0.617762	0.857411	1.10658	1.19512	1.17714	0.655997	1.08406	0.724687	0.050355
XLOC_010264	Rps6ka4	chr19:6903573-6915091	5.01838	4.28141	4.79478	3.72606	5.92683	7.56864	9.85201	6.11832	4.45516	7.36645	0.725493	0.022151
XLOC_005002	Dsp	chr13:38243162-38290446	25.0012	21.3022	20.6185	20.4258	26.483	43.5793	32.6916	41.7996	21.8369	36.1384	0.726762	0.0136457
XLOC_017229	Rab11fip5	chr6:85284955-85324628	13.8139	13.2031	15.2247	10.4092	22.9079	20.9579	28.5613	14.7142	13.1627	21.7853	0.726898	0.0293191
XLOC_008661	Crim1	chr17:78599587-78775932	4.79108	5.23985	5.60654	4.41874	6.12484	10.4038	9.44287	7.25909	5.01405	8.30765	0.728463	0.0175494
XLOC_004819	Ppp1r13b	chr12:113066668-113146266	3.87787	3.50741	2.94939	2.99043	4.38989	6.58822	7.28568	3.88256	3.33127	5.53659	0.732923	0.0421014
XLOC_012916	Rhoc	chr3:104591951-104597377	24.8071	37.9284	25.6866	25.6335	31.0226	45.6446	61.0006	51.9256	28.5139	47.3984	0.733171	0.0364917
XLOC_003521	Kctd11	chr11:69691765-69694487	3.0236	2.56754	2.55442	2.67179	4.78077	4.57543	4.53841	4.12076	2.70434	4.50384	0.735881	5.1904e-05
XLOC_011183	Sord	chr2:122060574-122091073	30.8991	32.2874	38.1373	36.4192	43.2077	55.1654	69.3431	61.7494	34.4357	57.3664	0.736299	0.00746671
XLOC_007414	Ppp1r1a	chr15:103360709-103368423	5.52167	5.33126	3.51825	5.68353	8.17094	8.37158	6.57247	10.296	5.01368	8.35275	0.736382	0.0106607
XLOC_005638	Iqgap2	chr13:96397131-96661877	18.5415	20.471	20.2384	23.9512	27.477	34.7587	40.4861	35.9145	20.8005	34.6591	0.736613	0.00319125
XLOC_005959	Rec8	chr14:56237002-56244232	3.4744	2.89953	3.73331	2.20068	5.97925	4.72356	6.05296	3.75425	3.07698	5.1275	0.736742	0.0193034
XLOC_016944	Calcr	chr6:3635719-3714713	0.981028	1.03788	0.906203	1.33123	1.64206	2.20268	1.57637	1.67714	1.06409	1.77456	0.73785	0.00608179
XLOC_004002	St6galnac2	chr11:116538018-116555974	5.40504	6.45307	4.46874	5.91084	10.6764	8.59717	7.49373	10.3633	5.55942	9.28265	0.739602	0.00498586
XLOC_022393	Nhsl2	chrX:99044723-99287394	0.436856	0.98126	0.677436	1.01068	0.930873	1.50953	1.34531	1.40594	0.776558	1.29791	0.741028	0.0310697
XLOC_020574	Irx3	chr8:94322409-94325553	11.8157	6.50298	10.3395	12.239	13.0457	18.5715	18.2259	18.8557	10.2243	17.1747	0.748284	0.0106372
XLOC_021324	Lamb2	chr9:108382192-108392861	6.49001	5.61062	5.71598	5.57429	10.085	9.47988	13.6689	6.16924	5.84772	9.85076	0.752359	0.0417618
XLOC_004169	Coch	chr12:52694327-52706760	1.93277	2.94511	2.6658	2.63208	3.60062	3.59396	5.46214	4.49131	2.54394	4.28701	0.752906	0.0124156
XLOC_014785	Tinagl1	chr4:129842843-129852366	17.6301	19.6397	18.3908	16.3068	34.5302	29.4858	30.4528	27.1218	17.9918	30.3976	0.756616	0.000332507
XLOC_003042	Grn	chr11:102291635-102298123	22.969	18.1396	25.5604	18.8835	33.4776	34.184	49.6325	27.2562	21.3881	36.1376	0.75669	0.0270361
XLOC_020728	Vps9d1	chr8:125756157-125778075	3.22228	2.81365	3.15039	2.1523	4.75635	4.41724	6.382	3.6557	2.83466	4.80282	0.760709	0.0197454
XLOC_018033	Htatip2	chr7:57014475-57029369	4.9014	3.95823	3.426	3.42221	5.14762	6.07372	7.75807	7.64902	3.92696	6.65711	0.761483	0.00921683
XLOC_022387	Nlgn3	chrX:98494517-98516689	3.32676	3.12249	2.8677	3.58074	7.97819	5.11538	4.44766	4.35885	3.22442	5.47502	0.763823	0.0405055
XLOC_004297	Jdp2	chr12:86940054-86980828	0.889284	1.06123	1.12133	1.18166	1.46937	1.39306	2.45405	1.90953	1.06338	1.8065	0.764547	0.0256581
XLOC_004066	Zfp750	chr11:121313262-121534465	0.609684	0.615294	0.876287	0.56936	1.3619	1.01	0.988328	1.18188	0.667656	1.13553	0.766185	0.00579261
XLOC_014838	Ldlrap1	chr4:134301326-134323919	13.5803	12.031	9.87109	9.71078	15.9815	21.4568	21.7028	17.7437	11.2983	19.2212	0.766594	0.00333482
XLOC_009991	Trpm6	chr19:18824472-18967001	2.49823	3.1309	4.20114	3.19558	3.86709	5.15277	7.08001	6.08647	3.25646	5.54659	0.768294	0.02476
XLOC_007743	Ets2	chr16:95924013-95942656	19.7876	15.091	16.9249	17.0751	22.4154	41.1233	20.9335	33.2126	17.2197	29.4212	0.7728	0.0459299
XLOC_022822	Pnma5	chrX:70279319-70282442	9.33946	15.0303	12.2095	8.55052	15.755	19.6746	23.0583	18.6506	11.2824	19.2846	0.773371	0.00903638
XLOC_020721	Galns	chr8:125102136-125135387	4.26899	5.23333	5.02668	3.54388	4.79859	8.27232	10.1684	7.73584	4.51822	7.74379	0.777285	0.0336757
XLOC_007223	Naga	chr15:82159961-82169256	6.05393	4.82937	2.55943	4.69444	8.82273	6.19168	6.21822	9.89269	4.53429	7.78133	0.779139	0.0336726
XLOC_016983	Cadps2	chr6:23212773-23789421	1.09029	1.22126	1.16264	0.966925	2.55094	1.25726	1.74533	2.08652	1.11028	1.91001	0.78266	0.0283921
XLOC_007585	Muc13	chr16:33794122-33820013	13.9644	21.5389	19.8307	13.5665	20.7789	27.3667	42.6469	27.7851	17.2251	29.6444	0.783245	0.0490862
XLOC_021583	Nrgn	chr9:37352077-37360330	1.12402	1.42462	1.19055	1.28009	2.40216	2.08528	2.22613	1.93362	1.25482	2.1618	0.784751	0.000268595
XLOC_002807	Slc46a1	chr11:78279202-78285447	8.73703	5.99113	7.7144	6.93729	14.0222	12.955	9.55633	14.1268	7.34496	12.6651	0.786029	0.00472838
XLOC_003102	Ttyh2	chr11:114536781-114582298	1.17859	1.36399	0.879623	1.21098	2.31378	1.48639	2.53489	1.66733	1.1583	2.0006	0.788427	0.0209407
XLOC_009546	Pqlc1	chr18:80451983-80489463	3.88792	2.45802	3.10893	3.83295	5.43538	5.52642	6.66487	5.32474	3.32195	5.73785	0.788478	0.0019166
XLOC_017003	Opn1sw	chr6:29298118-29330513	0.764832	0.650314	1.11141	0.835025	1.42689	1.67701	1.14033	1.56485	0.840395	1.45227	0.78917	0.00687025
XLOC_003455	Aldh3a2	chr11:61058256-61080629	9.08122	11.8045	10.0709	8.97996	12.6515	16.394	24.7842	15.3357	9.98414	17.2913	0.79234	0.0352509
XLOC_006451	Ephx2	chr14:66703208-66743359	4.62745	5.9945	5.22096	5.05528	7.92007	8.44237	10.2633	9.59789	5.22455	9.05591	0.793553	0.000726936
XLOC_005272	Lgals8	chr13:12531681-12554005	1.20848	1.36166	1.93884	1.22536	1.86349	2.31199	2.75511	3.02073	1.43359	2.48783	0.79526	0.0138931
XLOC_005468	Cltb	chr13:54694299-54712633	5.7644	4.27559	3.4162	3.95222	6.31341	9.37417	6.97736	7.57677	4.3521	7.56043	0.796755	0.00820714
XLOC_021108	Cln6	chr9:62686593-62723724	8.91516	8.11956	7.03409	6.7984	9.27624	13.1866	19.1772	12.0422	7.7168	13.4206	0.79837	0.0375265
XLOC_001343	Ctgf	chr10:24315247-24318488	5.07383	2.8399	3.8058	3.49209	8.24007	5.14518	6.50142	6.59967	3.8029	6.62158	0.800075	0.0116923
XLOC_001302	Cited2	chr10:17443033-17445480	34.7444	41.3819	38.5428	30.5739	37.2796	74.9056	68.5315	73.0552	36.3107	63.443	0.805064	0.0248997
XLOC_008727	Rnaset2b	chr17:8321455-8340697	6.58603	9.29081	7.15371	8.88707	9.23717	17.2102	12.7976	16.6689	7.9794	13.9785	0.808853	0.0227964
XLOC_017167	Gadd45a	chr6:66985089-67030646	3.60686	4.03627	3.81067	5.2787	7.04118	7.24386	6.90252	8.16373	4.18313	7.33782	0.810771	0.000536926
XLOC_018368	Eef2k	chr7:127986344-128050733	4.48605	4.13099	4.52666	4.75934	6.95237	10.3761	5.22305	8.90016	4.47576	7.86292	0.812932	0.0242967
XLOC_019701	F7	chr8:13026033-13035809	0.905841	0.770333	0.545007	0.664727	0.798364	1.62024	1.20227	1.45511	0.721477	1.269	0.814662	0.0306457
XLOC_006511	Dgkh	chr14:78969415-79124896	1.02296	0.798215	1.33579	0.787273	1.55972	1.77297	1.76576	1.83999	0.98606	1.73461	0.814865	0.00189315
XLOC_000400	Arl8a	chr1:137043410-137052845	8.22502	5.00884	4.7194	5.43568	10.4899	13.0967	6.36142	11.2693	5.84723	10.3043	0.817424	0.0344216
XLOC_022370	Ar	chrX:95345088-95512486	0.581676	0.421378	0.652046	0.960311	1.33463	0.89399	1.11972	1.26119	0.653853	1.15238	0.817582	0.0154568
XLOC_012086	Cd44	chr2:102651299-102741822	0.823714	0.910964	0.771716	1.23694	1.68178	1.65389	1.25716	2.00813	0.935833	1.65024	0.818352	0.00851517
XLOC_003896	Plcd3	chr11:102931609-102962972	4.12042	2.18166	2.98197	2.68195	6.76675	6.00979	5.08098	3.2737	2.9915	5.2828	0.820435	0.0370016
XLOC_018171	Wnt11	chr7:105987354-106003257	1.73556	2.32595	1.61649	1.77815	3.05048	2.7519	4.15417	3.21784	1.86404	3.2936	0.821233	0.0057542
XLOC_010677	Rnf208	chr2:25098448-25099781	9.33743	7.66749	7.11917	5.11395	14.3657	13.147	14.4944	9.66	7.30951	12.9168	0.821399	0.00765336
XLOC_005178	Serinc5	chr13:93381092-93481901	9.93363	8.82965	9.14712	7.24716	17.5456	16.2605	16.1395	12.8457	8.78939	15.6978	0.83673	0.000959627
XLOC_005195	Gcnt4	chr13:97694643-97720869	1.28369	2.65127	2.31672	1.46356	3.82304	3.86759	3.85278	2.26228	1.92881	3.45142	0.83948	0.0255317
XLOC_007484	Serpind1	chr16:17280443-17430919	0.398528	0.665844	0.848719	0.727447	0.815329	1.39581	1.31396	1.20884	0.660135	1.18348	0.842209	0.0169749
XLOC_004024	Sgsh	chr11:119176100-119216824	1.77304	2.46649	2.9339	2.12598	3.3134	3.6777	5.95977	3.78512	2.32485	4.184	0.847743	0.028706
XLOC_003025	Ifi35	chr11:101309725-101320015	0.936463	1.31426	1.10228	1.02999	2.14287	2.15944	1.18818	2.40528	1.09575	1.97394	0.849164	0.0202925
XLOC_006370	Tgm1	chr14:56318845-56332329	11.0663	10.0954	12.5419	9.42578	18.7112	16.6063	26.2631	16.2519	10.7823	19.4581	0.851702	0.0117475
XLOC_015808	Man2b2	chr5:37198051-37221888	20.4529	17.3766	20.2622	15.2744	26.2544	29.9086	47.9709	28.2773	18.3415	33.1028	0.85184	0.028847
XLOC_016584	Foxi3	chr6:70906599-70911060	4.46854	2.95636	5.91643	4.67383	8.4905	8.08799	8.12596	7.90439	4.50379	8.15221	0.856052	0.00106062
XLOC_015641	Arpc1b	chr5:145875124-145889055	62.4492	50.3843	48.4558	40.8221	69.6803	121.493	92.1657	82.5176	50.5279	91.4642	0.856128	0.0137683
XLOC_001242	Prox1	chr1:191945657-191994559	1.50102	1.34253	1.03125	1.81249	3.11654	1.90878	2.67585	2.59558	1.42182	2.57419	0.856376	0.00829097
XLOC_014069	Trim62	chr4:128561383-128588570	1.80086	1.19375	1.76555	1.10619	3.38793	2.83304	1.56597	2.84427	1.46659	2.6578	0.857771	0.0318056
XLOC_000633	Xkr4	chr1:3204562-3661579	0.874069	0.499261	0.429736	1.01346	1.24567	1.26385	1.72132	0.879599	0.704131	1.27761	0.85953	0.0424347
XLOC_006096	Klf5	chr14:99697909-99712628	11.0325	14.1608	14.64	13.2552	25.1741	21.3245	25.8042	24.1555	13.2721	24.1146	0.861506	0.000143374
XLOC_013838	Lurap1l	chr4:80556589-80600205	1.39446	3.14819	2.45523	2.33905	5.17814	4.48084	4.23078	3.09244	2.33423	4.24555	0.863003	0.0146816
XLOC_016083	Sirt4	chr5:115928018-115934493	1.26709	0.902614	0.819037	1.07294	1.67183	1.74324	2.50927	1.48574	1.01542	1.85252	0.867412	0.0145364
XLOC_020621	Fhod1	chr8:107853059-107871870	11.5831	7.7171	9.23567	9.23392	17.3639	17.4301	20.2312	13.9879	9.44245	17.2533	0.869637	0.00204207
XLOC_012702	Fam198b	chr3:79689851-79750200	2.11415	5.52561	3.24961	3.50097	3.91161	7.89927	8.05583	6.47331	3.59759	6.585	0.872156	0.0463585
XLOC_002916	Ppp1r9b	chr11:94852525-94868212	11.844	9.71218	12.4912	11.2787	24.6481	25.7071	13.8625	18.8891	11.3315	20.7767	0.874625	0.0152541
XLOC_001945	Aim1	chr10:43670112-43724652	0.681505	0.621214	0.852211	0.599318	1.07083	1.84201	0.922071	1.23099	0.688562	1.26648	0.87916	0.0331505
XLOC_008575	Pgc	chr17:47863790-47871427	5.19235	6.77284	3.85959	4.81354	6.40854	8.51939	13.6315	9.49661	5.15958	9.51401	0.8828	0.0371996
XLOC_021851	Fam46a	chr9:85214045-85220757	2.94155	3.93938	2.66956	2.32292	4.65488	6.57696	6.74655	4.00217	2.96835	5.49514	0.888494	0.0168194
XLOC_011450	Dbndd2	chr2:164311639-164318823	0.587432	1.23835	0.954427	0.839757	1.14249	2.15253	1.42842	1.98113	0.904992	1.67614	0.889169	0.0295688
XLOC_002703	Pld2	chr11:70353665-70371612	3.4699	2.06858	2.5539	2.55667	3.7318	4.47725	7.16369	4.36248	2.66226	4.9338	0.890048	0.0317614
XLOC_018471	Mgmt	chr7:144086293-144319871	2.0313	1.18655	1.02741	1.47505	3.05162	1.56953	3.29148	2.69306	1.43008	2.65142	0.890673	0.032272
XLOC_010451	Pdlim1	chr19:40296728-40346106	34.958	47.0963	33.9767	37.9684	50.4818	80.7047	71.718	82.9261	38.4999	71.4577	0.892236	0.00614865
XLOC_009795	Tshz1	chr18:84181018-84255954	1.91424	2.62517	2.02545	1.62194	4.29803	3.55658	4.03558	3.33938	2.0467	3.80739	0.895504	0.00115671
XLOC_008454	H2-D1	chr17:35400038-35462354	2.69071	4.79517	7.22363	6.00912	12.4701	11.2524	6.77678	8.09208	5.17966	9.64784	0.897349	0.0346999
XLOC_006933	Prr13	chr15:102289600-102293237	11.5151	11.9985	9.93194	8.26242	13.3855	19.7324	19.1055	25.6699	10.427	19.4733	0.901176	0.0142448
XLOC_000368	Slc45a3	chr1:133859491-133879549	1.86166	1.42411	1.87043	1.80673	2.44056	4.18685	2.03731	4.34452	1.74073	3.25231	0.90177	0.0456429
XLOC_002107	Creb3l3	chr10:80547077-80561617	17.3034	25.7571	24.7242	15.4587	29.2521	33.254	59.4623	33.6395	20.8109	38.902	0.902508	0.0500266
XLOC_004341	Slc24a4	chr12:103367628-103504959	0.618071	0.869535	0.862275	0.542954	0.793654	1.3772	1.9224	1.34192	0.723209	1.35879	0.909842	0.0411429
XLOC_012424	Sdc4	chr2:164249746-164268688	49.1037	42.4916	40.9718	36.0467	59.9362	84.3934	82.8486	89.6732	42.1535	79.2129	0.910084	0.00200383
XLOC_017319	Srgap3	chr6:112667965-112897260	0.924384	0.809121	0.877471	0.843842	1.0072	1.78142	1.78971	1.91923	0.863704	1.62439	0.911288	0.0109709
XLOC_013049	Ddah1	chr3:145421655-145557241	16.4333	20.5896	23.314	29.9184	41.1465	47.1164	32.2964	49.4792	22.5638	42.5096	0.913778	0.00575759
XLOC_018334	Parva	chr7:119571219-119735202	2.59409	1.86329	2.67876	2.74567	3.79298	5.77134	3.29291	5.78413	2.47045	4.66034	0.91566	0.0186176
XLOC_008569	AI661453	chr17:47549682-47607587	5.79992	5.04496	5.87894	6.89947	12.6726	14.5682	5.32914	12.0406	5.90582	11.1526	0.917175	0.042925
XLOC_019157	Crtc3	chr7:87731517-87833763	2.94956	1.91268	3.13791	2.18308	3.73336	5.61747	6.08349	3.79834	2.54581	4.80816	0.917363	0.0155925
XLOC_003084	Cep112	chr11:108286579-108721929	1.05992	0.651214	0.272514	1.10039	1.56409	1.36287	1.64185	1.26978	0.771009	1.45965	0.920799	0.0178357
XLOC_009150	Ticam1	chr17:56408884-56416190	4.80279	4.83978	4.64649	3.46021	7.64358	9.08394	9.73864	7.16428	4.43732	8.40761	0.922008	0.00116732
XLOC_005443	Wnk2	chr13:49131670-49243383	15.9561	9.91659	10.1777	10.4672	21.2961	22.7137	26.0641	18.3308	11.6294	22.1012	0.926347	0.00286598
XLOC_022968	Xkrx	chrX:130683583-130696467	2.68885	7.10571	3.56818	1.97942	6.51411	5.97739	8.90134	7.77367	3.83554	7.29163	0.926811	0.038922
XLOC_006254	Fam213a	chr14:41807028-41827064	34.6781	34.5688	13.5457	13.5907	57.785	51.8217	37.1045	37.1854	24.0958	45.9741	0.93204	0.0343657
XLOC_013757	Frmpd1	chr4:45197777-45298808	3.0096	1.54318	2.85554	3.29715	3.19046	5.21585	7.61224	4.55555	2.67637	5.14352	0.942481	0.0491376
XLOC_022705	Rhox8	chrX:35227952-35232121	1.58103	2.43132	2.47844	1.36483	2.6737	4.28731	3.59437	4.55978	1.96391	3.77879	0.944199	0.0118758
XLOC_000353	AA986860	chr1:132628552-132641199	2.70413	3.07086	3.13943	2.61494	4.19262	5.50454	6.34058	6.15989	2.88234	5.54941	0.945093	0.00184153
XLOC_011663	Nacc2	chr2:25911055-25978331	1.05984	0.47089	1.04826	0.553707	1.40506	1.78005	1.50505	1.34613	0.783174	1.50907	0.946257	0.00764499
XLOC_017855	Rinl	chr7:29573987-29583984	3.79037	3.09955	3.42565	4.82866	7.11621	8.10516	5.78235	8.38581	3.78606	7.34738	0.956534	0.00221389
XLOC_004816	Ckb	chr12:112907565-112910549	34.7214	20.544	19.7899	25.5656	57.0692	61.9794	32.3003	44.6337	25.1552	48.9956	0.961796	0.0190073
XLOC_006622	Dap	chr15:31154139-31204093	21.7958	19.2268	10.0157	8.83347	27.3211	30.6366	21.7094	37.237	14.9679	29.226	0.965378	0.0210106
XLOC_021389	Ctdspl	chr9:118835653-118953237	8.65398	6.05053	8.33738	8.98852	11.2758	18.3896	18.8794	14.0581	8.0076	15.6507	0.966787	0.00753456
XLOC_005184	Arsb	chr13:94541633-94712971	0.434649	0.669728	0.702728	0.587484	0.767203	1.29227	1.26694	1.362	0.598647	1.1721	0.969322	0.00846798
XLOC_002892	Cuedc1	chr11:87911559-88007642	1.19102	1.14809	0.540745	1.54945	2.6865	1.98175	2.84227	1.19476	1.10733	2.17632	0.97481	0.0478283
XLOC_015043	Sema3e	chr5:14025275-14256689	2.11902	3.25562	2.43847	4.77994	5.07985	7.53734	3.81261	8.32418	3.14826	6.18849	0.975033	0.0453996
XLOC_010759	Ass1	chr2:31325789-31376190	75.688	65.3092	56.6085	53.8386	115.899	127.895	110.949	140.03	62.8611	123.693	0.976528	0.00030004
XLOC_001749	B4galnt1	chr10:126602211-126609396	7.98467	3.66681	6.61783	7.2486	10.9771	15.1072	11.2106	13.1028	6.37948	12.5994	0.981848	0.00365566
XLOC_020475	Ifi30	chr8:73286671-73290562	59.6513	68.6585	71.0436	58.1865	71.7592	119.183	165.061	152.893	64.385	127.224	0.982575	0.0248064
XLOC_009824	Pold4	chr19:4231898-4233634	3.4663	2.27493	1.99069	1.89308	2.59279	4.72491	5.97872	5.79706	2.40625	4.77337	0.988222	0.0329102
XLOC_014833	Extl1	chr4:133912287-133928462	1.55095	0.783704	1.39568	1.31923	1.83407	3.56949	1.5803	3.06601	1.26239	2.51247	0.992946	0.0487899
XLOC_011752	Phf19	chr2:34749274-34769496	2.54687	1.68063	2.94235	2.50639	3.42358	4.49968	4.72884	6.66284	2.41906	4.82873	0.997199	0.0158906
XLOC_015770	Slc30a3	chr5:31388478-31395900	1.60689	0.873888	1.51024	1.13144	3.27011	1.5302	3.2211	2.21962	1.28061	2.56026	0.999453	0.0302082
XLOC_020367	Nrg1	chr8:32928499-33028675	1.57153	1.05819	1.30105	1.67093	2.36069	3.21563	2.84453	2.89301	1.40043	2.82847	1.01415	0.000701464
XLOC_008435	Slc44a4	chr17:35051410-35067381	2.94554	5.66154	4.78972	4.13973	6.69891	8.59203	10.7894	9.41593	4.38413	8.87407	1.0173	0.00474624
XLOC_013312	Efna1	chr3:89075651-89084873	2.05805	1.69695	1.21938	1.66357	2.74452	3.20782	3.72225	3.76594	1.65949	3.36013	1.01778	0.00121109
XLOC_001627	Timp3	chr10:85511490-85961641	8.04647	7.27234	6.68165	7.80509	8.07428	12.6705	22.3661	17.375	7.45139	15.1215	1.02102	0.0474933
XLOC_007132	Parp10	chr15:76063424-76073870	0.983011	1.00416	1.5288	1.81999	3.49194	2.50978	2.28216	2.5496	1.33399	2.70837	1.02168	0.00655406
XLOC_016735	Il17rc	chr6:113421448-113433157	1.49122	1.00281	2.19031	1.71543	4.68593	2.61829	3.45522	2.24296	1.59994	3.2506	1.02269	0.0322307
XLOC_020172	Hsd17b2	chr8:120225845-120282929	7.45095	11.4822	7.45241	5.08544	12.5769	15.9854	18.9315	16.4897	7.86775	15.9959	1.02368	0.00476992
XLOC_000260	Ugt1a1	chr1:89951985-90116577	1.87408	3.09646	2.78803	1.88548	3.46089	4.47758	6.24794	5.44628	2.41101	4.90817	1.02555	0.0103939
XLOC_011058	Chst1	chr2:92439863-92455409	2.32446	1.19689	2.85649	2.5859	6.13353	4.23481	4.79312	3.11522	2.24093	4.56917	1.02783	0.0183977
XLOC_010010	Smarca2	chr19:26679649-26898397	3.33285	3.34583	2.05087	2.78027	3.78796	7.28942	5.99465	6.50801	2.87745	5.89501	1.0347	0.00983375
XLOC_017036	Atp6v0a4	chr6:37998482-38204009	4.3675	3.35912	2.95078	4.76375	9.06287	8.21224	4.60929	9.77523	3.86029	7.91491	1.03586	0.016093
XLOC_012231	Prom2	chr2:127352688-127367153	0.4784	0.356768	0.798928	0.603324	0.919441	1.36628	0.69185	1.61735	0.559355	1.14873	1.0382	0.0428073
XLOC_000106	Stat4	chr1:52065087-52164028	0.613003	0.725329	0.393704	0.76522	0.722211	1.48672	1.36407	1.56775	0.624314	1.28519	1.04164	0.0197241
XLOC_013481	Gstm2	chr3:107784619-107789354	2.34164	4.15791	5.4127	4.48812	7.64051	9.8757	5.71701	10.5434	4.10009	8.44416	1.0423	0.0143709
XLOC_006903	Letmd1	chr15:100299464-100309683	3.81647	2.41361	2.29191	2.30137	5.11595	5.25949	6.2188	5.69809	2.70584	5.57308	1.0424	0.000674499
XLOC_013482	Gstm1	chr3:107815167-107820891	37.6505	39.9902	36.8841	32.6893	73.2291	68.8518	74.2782	87.6127	36.8035	75.9929	1.04602	0.000101241
XLOC_018820	Gm7092	chr7:26399639-26400911	3.29491	2.88112	1.78606	1.54392	4.76042	4.9507	6.43442	3.52289	2.3765	4.91711	1.04897	0.0132117
XLOC_000056	Ptpn18	chr1:34516590-34530624	1.12306	0.832588	0.72106	0.312415	1.94799	1.45062	1.86205	0.928527	0.747281	1.5473	1.05003	0.0317817
XLOC_000435	Fam129a	chr1:153418502-153566477	6.40584	5.50201	6.34203	5.28348	7.01576	15.7526	11.4342	14.6823	5.88334	12.2212	1.05468	0.0187276
XLOC_003339	Timd2	chr11:46482461-46520606	3.13474	7.73307	3.94247	3.64095	6.86178	10.347	9.60086	11.6769	4.61281	9.62164	1.06064	0.0140775
XLOC_016581	E230016M11Rik	chr6:66985089-67030646	0.596302	0.850053	0.897539	0.915637	1.31357	1.36529	1.93103	2.19143	0.814883	1.70033	1.06115	0.00809125
XLOC_004079	Gm6682	chr12:4788975-4790318	1.59635	0.880278	1.07294	2.53598	2.52629	2.62215	4.50565	3.04515	1.52139	3.17481	1.06128	0.0308443
XLOC_012063	Gyltl1b	chr2:92205202-92211193	7.26934	5.57203	7.19605	7.37513	11.4634	14.6428	14.0899	17.0796	6.85314	14.3189	1.06309	0.000905394
XLOC_003733	Pdk2	chr11:94887571-94902685	2.20707	2.00869	2.46159	2.6547	3.49691	4.11114	5.7901	6.10955	2.33301	4.87692	1.06378	0.00791185
XLOC_001544	9130017N09Rik	chr10:79283765-79293197	2.12529	3.12252	2.24268	2.41152	4.1399	5.53069	6.1197	4.93114	2.4755	5.18036	1.06533	0.00131784
XLOC_001138	Gm7694	chr1:172228323-172236463	0.72984	0.289283	0.620069	0.687643	1.3416	1.10938	0.94249	1.49719	0.581709	1.22266	1.07166	0.00674832
XLOC_014983	Trp73	chr4:153430357-153514317	0.503691	0.140956	0.524725	0.766921	1.40933	0.956107	0.782367	0.923813	0.484073	1.0179	1.0723	0.0291968
XLOC_000840	Slc23a3	chr1:75122115-75130464	2.17101	3.81408	2.31653	1.44889	4.53541	4.3178	7.94957	3.71854	2.43763	5.13033	1.07357	0.0464838
XLOC_007360	Smagp	chr15:100451770-100467296	10.9529	7.23892	10.0019	10.9112	18.0514	23.3637	15.1786	25.865	9.77623	20.6147	1.07632	0.00576778
XLOC_001012	Elf3	chr1:137150150-137155049	21.4856	12.3326	14.5396	9.91104	20.1478	45.7814	23.6983	34.226	14.5672	30.9634	1.08784	0.0402604
XLOC_013563	Npnt	chr3:132545658-132613255	0.534443	0.459622	0.903455	0.394913	0.763779	1.67188	1.43538	1.00539	0.573108	1.21911	1.08895	0.0330948
XLOC_002700	Tm4sf5	chr11:70318775-70324686	10.3866	13.0871	6.62635	9.81946	20.4285	17.694	18.2988	28.6547	9.97988	21.269	1.09166	0.00752571
XLOC_007949	Pla1a	chr16:38396202-38433225	0.793558	2.58404	1.94161	1.70206	2.98123	3.35131	5.53381	3.17639	1.75532	3.76069	1.09926	0.0288933
XLOC_020050	Cpne2	chr8:97056927-97094429	1.45719	0.912222	1.58922	1.2686	3.90494	1.80009	1.99169	3.51071	1.30681	2.80186	1.10034	0.0348727
XLOC_006672	Col14a1	chr15:55139304-55352358	1.00023	0.800215	1.0365	0.554277	1.97551	1.83638	1.51263	1.95184	0.847805	1.81909	1.10141	0.000734098
XLOC_020117	1810019D21Rik	chr8:108655082-108662622	0.956561	1.16125	1.19313	0.789638	1.77955	2.3627	2.42071	2.24904	1.02514	2.203	1.10364	0.000499877
XLOC_018869	Kcnk6	chr7:30006946-30017541	4.26112	2.78583	3.71349	4.21302	7.56502	11.3581	3.50103	9.82694	3.74336	8.06277	1.10694	0.0478783
XLOC_006987	Ankrd33b	chr15:31221234-31297514	6.05795	6.56822	7.13231	4.00541	8.16445	14.0886	16.9115	12.4515	5.94097	12.904	1.11905	0.0118142
XLOC_021012	Apoa4	chr9:46048926-46051541	171.852	142.264	116.311	92.94	230.678	248.081	418.161	248.189	130.842	286.277	1.12959	0.0167022
XLOC_002821	Adap2	chr11:79967663-79992329	0.632114	1.31442	0.706271	0.975668	1.63335	1.66558	2.59464	2.04696	0.907118	1.98513	1.12987	0.00742261
XLOC_020044	Mt1	chr8:96702988-96704227	337.218	449.756	530.239	311.943	469.04	842.066	939.695	1333.99	407.289	896.198	1.13776	0.0382617
XLOC_008355	Cdkn1a	chr17:29227930-29237667	2.8252	2.35838	2.67937	3.20618	9.30785	5.89953	4.5943	4.62115	2.76728	6.10571	1.14169	0.0249372
XLOC_002561	Igtp	chr11:58013057-58021094	0.340855	0.990991	1.22152	0.844721	2.40224	1.49844	1.4399	2.16746	0.849522	1.87701	1.14371	0.0149374
XLOC_005539	Ptch1	chr13:63612840-63666828	21.8165	18.8307	15.9154	22.4103	50.8173	52.5653	42.1913	31.0849	19.7432	44.1647	1.16154	0.00314646
XLOC_011701	1700101E01Rik	chr2:28811000-28910586	0.491133	0.325622	0.828315	0.746608	0.951133	1.41526	1.67235	1.31672	0.59792	1.33887	1.16299	0.00779731
XLOC_015812	Stk32b	chr5:37838063-38108392	0.434407	0.114986	0.719698	0.482719	0.737799	1.14922	1.15198	0.949032	0.437952	0.997008	1.18683	0.0124908
XLOC_013510	S1pr1	chr3:115413350-115417973	1.13565	0.830838	1.68125	2.66248	3.06946	3.71341	2.9638	4.71445	1.57755	3.61528	1.19642	0.011598
XLOC_000197	Cyp27a1	chr1:74760147-74784464	0.834008	0.706894	0.529323	0.161829	1.72731	1.46926	1.04361	0.939082	0.558013	1.29482	1.21437	0.0202212
XLOC_018870	2200002D01Rik	chr7:30023341-30033486	12.3268	16.1209	14.2767	12.5184	31.2533	31.9255	23.4706	41.754	13.8107	32.1009	1.21683	0.00315517
XLOC_000200	Cdk5r2	chr1:74901602-74904306	0.336947	0.374453	0.617717	0.751061	1.3444	0.940941	1.10548	1.4627	0.520045	1.21338	1.22232	0.00403363
XLOC_006623	Cmbl	chr15:31498666-31519874	0.615778	1.54286	0.461856	0.373055	1.14662	2.47107	1.89669	1.47749	0.748387	1.74797	1.22382	0.0437998
XLOC_003127	Itgb4	chr11:115836038-115874033	1.80646	1.07712	1.86454	1.35562	2.81583	3.95215	4.24122	3.29676	1.52594	3.57649	1.22885	0.00150469
XLOC_019892	Pbx4	chr8:72356602-72396191	0.569779	0.1	0.478833	0.582042	0.953372	0.734387	1.43401	0.977714	0.432663	1.02487	1.24412	0.0187863
XLOC_004164	Nrcam	chr12:45429871-45702833	1.36577	1.19223	0.753102	1.22047	3.40737	3.97201	1.87074	1.56427	1.13289	2.7036	1.25487	0.0394681
XLOC_010824	Lhx2	chr2:38206827-38225248	0.753102	1.13233	1.28945	0.675321	1.39086	3.61959	2.53464	1.65583	0.962551	2.30023	1.25684	0.0434388
XLOC_017779	Cadm4	chr7:25267041-25289552	1.35528	1.24353	1.77103	0.769142	2.73414	3.42725	4.21509	1.94999	1.28475	3.08162	1.26221	0.0141615
XLOC_022572	Rai2	chrX:158154967-158217426	0.895413	0.57542	0.868516	1.1043	2.95907	2.20755	1.6271	1.47577	0.860912	2.06737	1.26386	0.0142887
XLOC_006397	Gjb2	chr14:57717438-57723539	7.73326	6.63758	7.06842	4.58706	14.1825	13.3756	14.7858	20.4923	6.50658	15.709	1.27162	0.00194085
XLOC_002562	Irgm2	chr11:58028478-58036285	0.250842	0.23204	0.575218	1.013	1.14844	1.32146	1.03821	1.49579	0.517775	1.25097	1.27266	0.0125949
XLOC_016762	Cxcl12	chr6:117118552-117131386	9.91332	10.0354	10.7739	15.9708	43.9517	23.3833	17.1447	28.9758	11.6734	28.3639	1.28084	0.0301838
XLOC_010198	Gstp2	chr19:4040287-4042221	3.38588	4.50882	2.34896	2.7638	6.90118	10.5932	5.12996	9.12917	3.25187	7.93838	1.28758	0.0110589
XLOC_021548	Adamts15	chr9:30706739-30730037	1.48976	1.56636	1.57203	1.52216	5.6036	2.73754	4.2697	2.41582	1.53758	3.75666	1.28879	0.0236522
XLOC_001573	Izumo4	chr10:80165437-80168127	0.725972	0.123765	0.1	0.944092	1.35378	1.41184	0.932474	0.951106	0.473457	1.1623	1.29568	0.0325244
XLOC_010402	Glis3	chr19:28336937-28794517	0.299636	0.824932	0.696054	0.343352	1.05242	1.1768	1.57956	1.5229	0.540994	1.33292	1.30091	0.00494491
XLOC_006363	Emc9	chr14:56197330-56204091	0.999944	0.952875	1.26962	0.821514	1.78094	2.63452	3.34675	2.2638	1.01099	2.5065	1.30991	0.00478799
XLOC_013266	Fam160a1	chr3:85463984-85550131	0.454084	0.578157	0.204036	0.362316	0.72026	1.04255	0.613528	1.59007	0.399648	0.991602	1.31103	0.0440867
XLOC_001139	Nos1ap	chr1:172247626-172519980	1.91019	0.396716	0.935837	0.697694	2.30656	2.55718	2.39957	2.59176	0.985109	2.46377	1.32251	0.00445489
XLOC_007343	C1ql4	chr15:98915184-98918159	1.0908	0.894687	1.84628	0.489737	1.98858	2.82226	4.07353	1.92991	1.08038	2.70357	1.32333	0.0302819
XLOC_001055	Lamc2	chr1:154969885-155033577	0.51396	0.851025	0.592582	0.55201	1.01795	1.68308	2.41484	1.17378	0.627394	1.57241	1.32554	0.0266778
XLOC_004612	Slc25a21	chr12:57813620-58298459	0.740999	0.587621	0.558059	0.733092	0.975923	1.40496	1.93577	2.27647	0.654943	1.64828	1.33152	0.0142507
XLOC_005033	Barx1	chr13:48758404-48761876	0.796836	0.819691	0.628875	0.172221	1.59512	1.76281	1.8193	0.941082	0.604406	1.52958	1.33954	0.0103683
XLOC_014045	Rspo1	chr4:124663673-124686343	1.59541	2.12802	1.4337	3.31916	8.19528	5.23684	2.45909	5.56302	2.11907	5.36356	1.33976	0.0406936
XLOC_018997	Fcgrt	chr7:52348362-52359192	14.5998	3.7571	8.57991	5.90682	16.0553	23.3981	24.4228	19.9434	8.21091	20.9549	1.35167	0.00552412
XLOC_010031	Mbl2	chr19:30307446-30314172	1.34132	1.95526	2.23349	1.02478	2.15405	4.12987	6.03021	4.42745	1.63871	4.18539	1.3528	0.0232767
XLOC_000263	Spp2	chr1:90303593-90323013	7.98366	10.4409	5.61651	3.23725	13.6859	16.3257	27.153	13.3946	6.81958	17.6398	1.37108	0.0235716
XLOC_011648	Ptgds	chr2:25322231-25325269	0.755787	2.98042	1.3101	1.4444	4.32446	3.48681	6.5799	2.46433	1.62268	4.21387	1.37677	0.0406944
XLOC_008401	Tapbp	chr17:34056422-34066235	5.40125	5.41389	5.68502	5.5066	24.5172	11.3222	11.6216	9.72221	5.50169	14.2958	1.37764	0.0428213
XLOC_001000	Atp2b4	chr1:135599250-135650324	0.650168	0.499862	0.727739	0.632057	1.50579	1.26133	2.03055	1.74954	0.627456	1.6368	1.38329	0.00106555
XLOC_018484	Prap1	chr7:147279294-147283102	0.749279	1.47753	0.835314	1.40884	1.77056	3.13872	4.46942	2.34823	1.11774	2.93173	1.39117	0.0254881
XLOC_001794	Itga7	chr10:128370868-128398044	4.35087	2.60346	5.36633	5.80054	10.2933	17.28	6.40655	13.5619	4.5303	11.8854	1.39152	0.0229789
XLOC_002272	Gli1	chr10:126760782-126778635	1.9205	1.61721	1.47997	2.87451	6.52346	5.95402	5.2747	3.2471	1.97305	5.24982	1.41184	0.00570479
XLOC_005416	Tfap2a	chr13:40811043-40829192	0.837422	0.703913	0.871289	1.23769	1.35126	3.66195	2.34144	2.76984	0.912578	2.53112	1.47176	0.0168036
XLOC_009194	Ptprm	chr17:67016187-67703799	0.368927	0.646221	0.365507	0.640873	1.64029	1.61918	0.816798	1.54667	0.505382	1.40573	1.47588	0.00550025
XLOC_019415	Scube2	chr7:116942204-117009193	1.96442	2.52333	1.34224	1.89688	2.06234	5.24842	8.76798	5.5617	1.93172	5.41011	1.48577	0.0465325
XLOC_008412	Tap1	chr17:34324500-34334170	0.1	0.357837	0.646292	0.40405	1.42706	0.798469	1.1426	0.929943	0.377045	1.07452	1.51088	0.00763948
XLOC_010780	Eng	chr2:32502114-32549695	0.942833	1.2642	1.34111	2.22194	5.72417	3.53261	1.65513	5.5483	1.44252	4.11505	1.51232	0.036536
XLOC_016250	Micall2	chr5:140182646-140212287	0.187418	0.599664	0.368762	0.47544	1.7826	0.759175	0.993323	1.31741	0.407821	1.21313	1.57272	0.0148509
XLOC_010179	Eno4	chr19:59017914-59045911	0.37093	0.230943	0.10817	0.650801	0.560719	1.41133	1.45711	0.667165	0.340211	1.02408	1.58983	0.0417387
XLOC_012998	Cfi	chr3:129539656-129578246	0.586903	1.04863	0.627981	0.176456	2.14795	1.28481	1.22405	2.70069	0.609992	1.83937	1.59235	0.0214983
XLOC_010794	Gsn	chr2:35111878-35163422	30.5779	16.6791	12.5169	7.89416	28.9623	56.647	85.6198	35.4171	16.917	51.6615	1.61062	0.0440554
XLOC_003342	Irgm1	chr11:48678750-48684848	1.39793	1.14078	1.80793	1.70678	5.6091	4.12778	3.95408	4.90488	1.51336	4.64896	1.61916	0.00026133
XLOC_010182	Emx2	chr19:59533179-59539847	0.225964	0.747188	0.272444	0.405822	0.315179	1.66379	1.72886	1.40818	0.412855	1.279	1.63131	0.0477403
XLOC_008309	Gng13	chr17:25854116-25864360	1.52752	0.748753	2.88311	1.36032	3.61871	6.27811	3.59734	7.04004	1.62993	5.13355	1.65515	0.0128369
XLOC_000251	Efhd1	chr1:89160938-89207366	0.467272	0.247512	0.425633	0.360463	1.98031	1.43232	0.758763	0.560135	0.37522	1.18288	1.6565	0.0491088
XLOC_012166	Ppp1r14d	chr2:119043858-119055601	3.02996	6.56486	3.04229	1.56139	11.3961	8.93083	15.4361	9.16161	3.54962	11.2312	1.66177	0.00592409
XLOC_009803	Cpt1a	chr19:3323300-3385733	1.16082	1.20302	1.46617	1.31524	3.9827	3.96359	3.94577	4.7132	1.28631	4.15131	1.69033	7.13263e-06
XLOC_009247	Six3os1	chr17:86001271-86017736	0.439812	0.231732	0.351331	0.615946	1.08065	1.67786	1.57786	0.989979	0.409705	1.33159	1.70049	0.00293631
XLOC_009739	Rax	chr18:66094292-66098743	0.54014	0.550645	0.909322	0.868045	1.92136	1.81169	3.99025	1.63971	0.717038	2.34075	1.70685	0.0276784
XLOC_015291	Afp	chr5:90919739-90937933	105.572	167.954	141.82	112.859	256.49	435.773	660.824	395.534	132.051	437.155	1.72705	0.011556
XLOC_004666	Gpx2	chr12:77893321-77896541	0.409542	1.98725	1.77766	0.104877	2.62883	5.18366	4.74098	1.86528	1.06983	3.60469	1.75249	0.0349431
XLOC_011276	Pcsk2	chr2:143361211-143642018	0.399841	0.165896	0.387636	0.458952	1.25782	1.17005	0.916426	1.58041	0.353081	1.23118	1.80197	0.00115207
XLOC_005088	Tgfbi	chr13:56710963-56740700	0.445048	0.634594	0.610331	0.617858	1.62483	2.51429	2.17727	1.91736	0.576958	2.05844	1.83501	0.000265888
XLOC_002783	Slc6a4	chr11:76812098-76845845	0.32746	0.532634	0.105489	0.218713	0.871966	0.926074	1.44451	1.0121	0.296074	1.06366	1.84501	0.00289997
XLOC_005582	Irx1	chr13:72095679-72101171	7.1361	3.04039	2.42877	2.32978	5.69516	21.3942	15.9514	11.8151	3.73376	13.714	1.87694	0.0293583
XLOC_015420	Oasl2	chr5:115346942-115362254	0.671867	0.653814	0.797525	1.33434	3.03662	3.84367	1.95568	4.06897	0.864386	3.22623	1.9001	0.00337472
XLOC_008413	Psmb8	chr17:34335139-34338399	0.25282	1.20583	0.973067	0.478709	3.99814	1.49885	2.16518	3.53365	0.727606	2.79895	1.94366	0.0158284
XLOC_022288	Gpr50	chrX:68916941-68921264	0.237731	0.432813	0.1	0.338165	0.850919	0.88687	0.723102	1.86784	0.277177	1.08218	1.96506	0.025895
XLOC_017695	Pglyrp1	chr7:19470038-19475787	0.263718	0.188577	0.1	0.550702	0.948048	1.89323	0.534966	1.04764	0.275749	1.10597	2.00388	0.0329973
XLOC_012082	Prr5l	chr2:101554441-101679137	0.477074	0.739859	0.56642	0.42398	1.78203	2.38104	2.53499	2.27569	0.551833	2.24344	2.02341	7.46252e-05
XLOC_008204	Lix1	chr17:17539649-17596351	0.286623	0.378297	0.349958	0.645102	1.29968	2.37477	2.01173	1.71106	0.414995	1.84931	2.15582	0.00101299
XLOC_001100	Fmo1	chr1:164759691-164796679	5.19844	4.13668	7.495	4.45707	10.863	23.1855	33.892	29.1998	5.3218	24.2851	2.19008	0.00936216
XLOC_016734	Il17re	chr6:113408477-113420745	0.320625	0.107445	0.237468	0.415475	1.18944	1.4727	0.928322	1.77878	0.270253	1.34231	2.31233	0.00149406
XLOC_002021	Susd2	chr10:75099363-75106753	1.62785	2.37918	1.80223	1.68401	6.54547	10.2952	14.4535	6.09634	1.87332	9.34763	2.319	0.00867896
XLOC_020251	Pcp2	chr8:3621550-3625545	0.406375	0.3073	0.1	0.311263	0.292655	1.68798	2.20594	1.77073	0.281234	1.48933	2.40481	0.0281271
XLOC_006885	1700120C14Rik	chr15:99055406-99092472	0.1	0.479553	0.654417	0.1	1.35843	0.848493	1.94946	2.94951	0.333493	1.77647	2.41329	0.0223355
XLOC_015624	0610040B10Rik	chr5:144090986-144094383	0.1	0.42838	0.1	0.1	1.30084	1.39326	0.521428	1.03552	0.182095	1.06276	2.54506	0.00601568
XLOC_019610	Cdhr5	chr7:148454983-148462685	0.233801	0.55398	0.306435	0.171548	1.47634	1.56496	3.32341	1.84757	0.316441	2.05307	2.69777	0.00747648
XLOC_008684	Six3	chr17:86020173-86025531	0.794819	0.578637	0.423225	0.762677	2.90185	5.91825	5.45376	2.37754	0.63984	4.16285	2.70179	0.00766194
XLOC_019697	Sox1	chr8:12385770-12436732	0.253568	0.1	0.194507	0.223371	0.898904	2.4152	2.26219	0.730843	0.192861	1.57678	3.03135	0.0205867
XLOC_008890	Clps	chr17:28695158-28697659	0.1	0.30846	0.409608	0.307518	0.279665	3.21729	5.21266	2.60986	0.281396	2.82987	3.33006	0.04628
