# Supplementary material for: Zfp281 is essential for mouse epiblast maturation through transcriptional and epigenetic control of Nodal signaling
Source: eLife journal article supplement (doi:10.7554/elife.33333), 2017-11-23
Supplement: supp [file elife-33333-supp-v1.zip › elife_poa_e33333_Figure_2_source_data_1.xlsx]

## Sheet: Sheet1
RT-qPCR Primers	FWD	REV
Axin2	TGACTCTCCTTCCAGATCCCA	TGCCCACACTAGGCTGACA
Cer1	CTCTGGGGAAGGCAGACCTAT	CCACAAACAGATCCGGCTT
Cripto	GGGGATACAGAACAGTAAGTCGC	TTGCGTCCATAGAAGGAAGGA
Dkk1	CTCATCAATTCCAACGCGATCA	GCCCTCATAGAGAACTCCCG
Eomes	AGAACCGTGCCACAGACCAA	TGGTCACAGGTTGCTGGACA
Fgf5	AGCTGTTTTCTTGGAATCTCTCC	TGTGTCTCAGGGGATTGTAGG
Fgf8	AACTCGGACTCTGCTTCCAA	CAGGTCCTGGCCAACAAG
Foxh1	GACCTGGCCTCAACTTACACT	TGTCATGCCGTAGGTATCTCTTC
Gsc	CCCCGGTTCTGTACTGGTG	TCTGGGTACTTCGTCTCCTGG
Hesx1	AGCATTTTAGGACTGGACCA	ATGAAGTCTCACTGGGAAGA
Hex	CTACACGCACGCCCTACTC	CAGAGGTCGCTGGAGGAA
Lefty1	TGTGTGTGCTCTTTGCTTCC	GGGGATTCTGTCCTTGGTTT
Lefty2	GTGGCTTTGCTGGGCACTCT	CCTCACGTGGGTAGGGATGG
Lhx1	CCCATCCTGGACCGTTTCC	CGCTTGGAGAGATGCCCTG
Nanog	TGGTCCCCACAGTTTGCCTAGTTC	CAGGTCTTCAGAGGAAGGGCGA
Nodal	TCTGGCGTACATGTTGAGC	GGTGGAAAATGTCAATGGTGAG
Oct4	GTGGAGGAAGCCGACAACAATGA	CAAGCTGATTGGCGATGTGAG
Otx2	CGTGGGCTACCCCGCCAC	CTGGGTACCGGGTCTTGGCA
Sox2	CTGGACTGCGAACTGGAGAAG	AATTTGGATGGGATTGGTGGT
T	GCTTCAAGGAGCTAACTAACGAG	CCAGCAAGAAAGAGTACATGGC
Zfp281	GCACCACCGCGATGTATTACT	CCTTTTTGACGTTAGCGTCCTG
