# Supplementary material for: Zfp281 is essential for mouse epiblast maturation through transcriptional and epigenetic control of Nodal signaling
Source: eLife journal article supplement (doi:10.7554/elife.33333), 2017-11-23
Supplement: supp [file elife-33333-supp-v1.zip › elife_poa_e33333_Figure_5_source_data_1.xlsx]

## Sheet: Sheet1
ChIP-qPCR Primers	FWD	REV
Otx2-Pro	CCCGAGGAAAGCAATTACAA	AAATGGCCCCAATCAAGTTT
Otx2-Neg	AATGCCTGGCTAAAACTGGA	CTTCAATGCTGACTGCTTGG
T-P1	TCACCGAGAGGCAATAAACC	TGGACTTTGACGGTGGATG
T-P2 (Pro)	GTGGCGAGAGAAGTGAAGGT	CAGGTGGTCCACTCGGTACT
T-Neg	CCTAGCTGTTTTGGCTTTGG	GCTGAGGCAGGAGAATCAAG
Eomes-Pro	CCCAACTGGCCTTTATAACC	GAGCACTCTCCAGCGAGTAGA
Eomes-Neg	CTGGCTGGAGCTCTGCTAGT	CCCCATATGTCCCCCTTACT
Gsc-Pro	GTAGAGCGAGTCCCCGTGTAG	CATGTTCAGCATCGACAACATC
Gsc-Neg	GATCCCAGCAGAGGAGGTAAA	TGACTAAGCCCAGGACTGACA
Fgf5-P1	TTGCATGACGGATGCATTAC	TGTCATTTGCAGGAACTCCA
Fgf5-P2	TCCCGCTCTGCCTCTACTTC	GTGCCAAGCAATGGAATCAG
Fgf5-Neg	GAGGCTATGTCCACCCTGTG	GGGTCCTAAGTGCATCTTGC
Fgf8-P1	TCCAATCGCTTCTCACCTCTC	CCCTGGCTGCTGTGTGTTAAG
Fgf8-P2	TTAGGATCAGCTCCCAGGACA	CATTAGTCACGGCTCCTCTCG
Fgf8-Neg	GACACAAAAGTGCAACCCAGA	CAGGCATGAGAGGAATGAACA
mCh6	CCCCTTTCTGAAGCACTCTG	TAAGGCGTCATTTCCCAAAG
