# Supplementary material for: Zfp281 is essential for mouse epiblast maturation through transcriptional and epigenetic control of Nodal signaling
Source: eLife journal article supplement (doi:10.7554/elife.33333), 2017-11-23
Supplement: supp [file elife-33333-supp-v1.zip › elife_poa_e33333_Figure_6_source_data_1.xlsx]

## Sheet: Sheet1
ChIP-Seq Dataset	GEO Accession Numbers
CoRest	GSM845235
Hdac1	GSM687277,8
Hdac2	GSM687279,80
Chd4	GSM687284
Nanog	GSM307140,1
Oct4	GSM307137
Sox2	GSM307138,9
Ezh2	GSM327668
Suz12	GSM307144,5
Rest	GSM687285
Lsd1	GSM687281,2
P300	GSM594600,1
Ep400	GSM1650013
Mbd3	GSM786608,9
