# Supplementary material for: Zfp281 is essential for mouse epiblast maturation through transcriptional and epigenetic control of Nodal signaling
Source: eLife journal article supplement (doi:10.7554/elife.33333), 2017-11-23
Supplement: supp [file elife-33333-supp-v1.zip › elife_poa_e33333_Figure_7_source_data_1.xlsx]

## Sheet: Sheet1
ChIP-qPCR Primers	FWD	REV
Nodal-PPE	ATAGAGCATGGGTGCTTGCTG	AATGGCAAGATTGGCACTAGC
Nodal-NDE	TAACCAAAACAGACCTGGCTTC	GACAAGGACCAAAATGACTGGA
Nodal-HBE	CGGACTTTGGGACAGGAATTT	AGGAAGGGAGCCATTGAGAAG
Nodal-ASE	AGAGGGAGTTCGGACTCAGG	CGGGTCAGACCGGATTAGA
Nodal-Neg	AAGAAATGGTCTTCCCCCACT	TGTGTTTTCTGGACTCCATGC
Lefty2-P1	AGGTAGTCAGGAAGCGGAGGT	ACAGGGGTGTGTCAGAGCAGT
Lefty2-Neg	GAGCCCTGGTGGTTAAATGGT	GCCACAGCTTTTGCACTTTTC
Foxh1-P1	GCCAGGCCCTTTCTTTATCAT	GCCCTTCCCTCCAAGATTAAC
Foxh1-Neg	GTGGTTGCTGGGATTTGAACT	ACATGGAAACCAGAGGCAGAT
mCh6	CCCCTTTCTGAAGCACTCTG	TAAGGCGTCATTTCCCAAAG
