# Supplementary figures and images for: Zfp281 is essential for mouse epiblast maturation through transcriptional and epigenetic control of Nodal signaling
Source: eLife journal article supplement (doi:10.7554/elife.33333), 2017-11-23

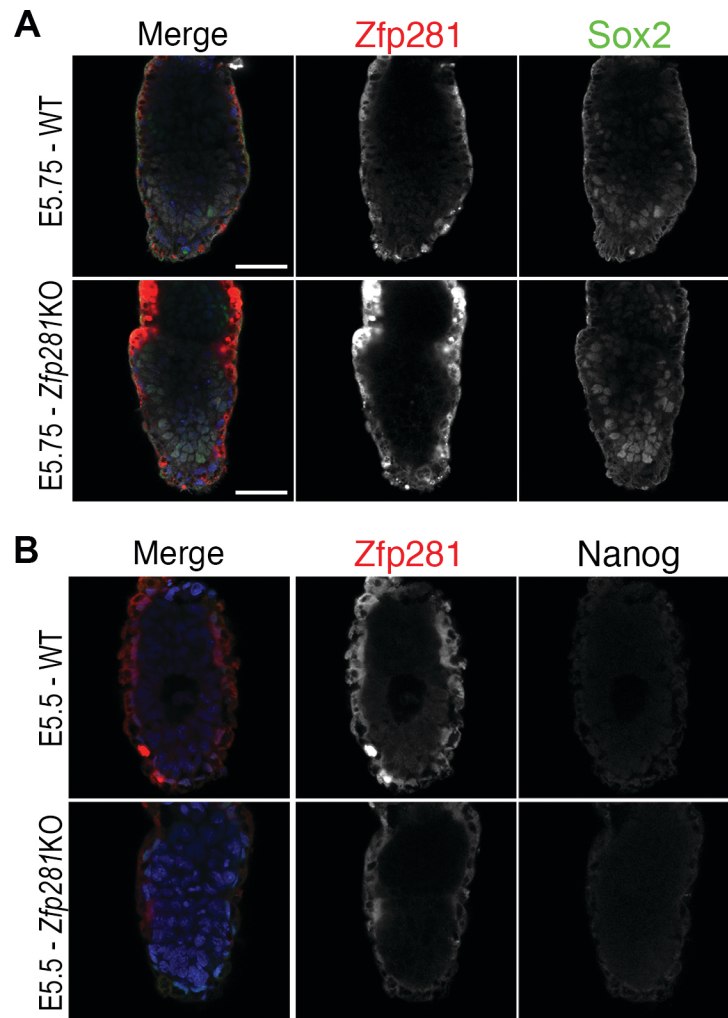

Figure 3-figure supplement 1

Supplement: supp [file elife-33333-supp-v1.zip]

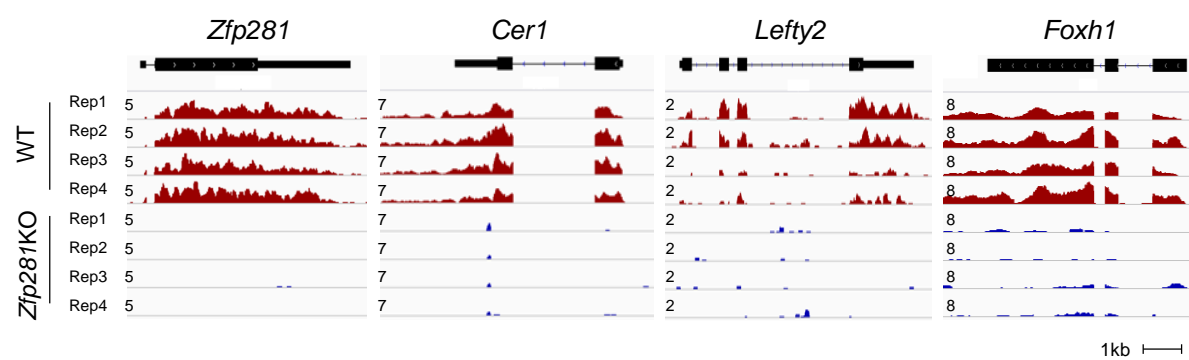

Figure 2-figure supplement 2

Supplement: supp [file elife-33333-supp-v1.zip]

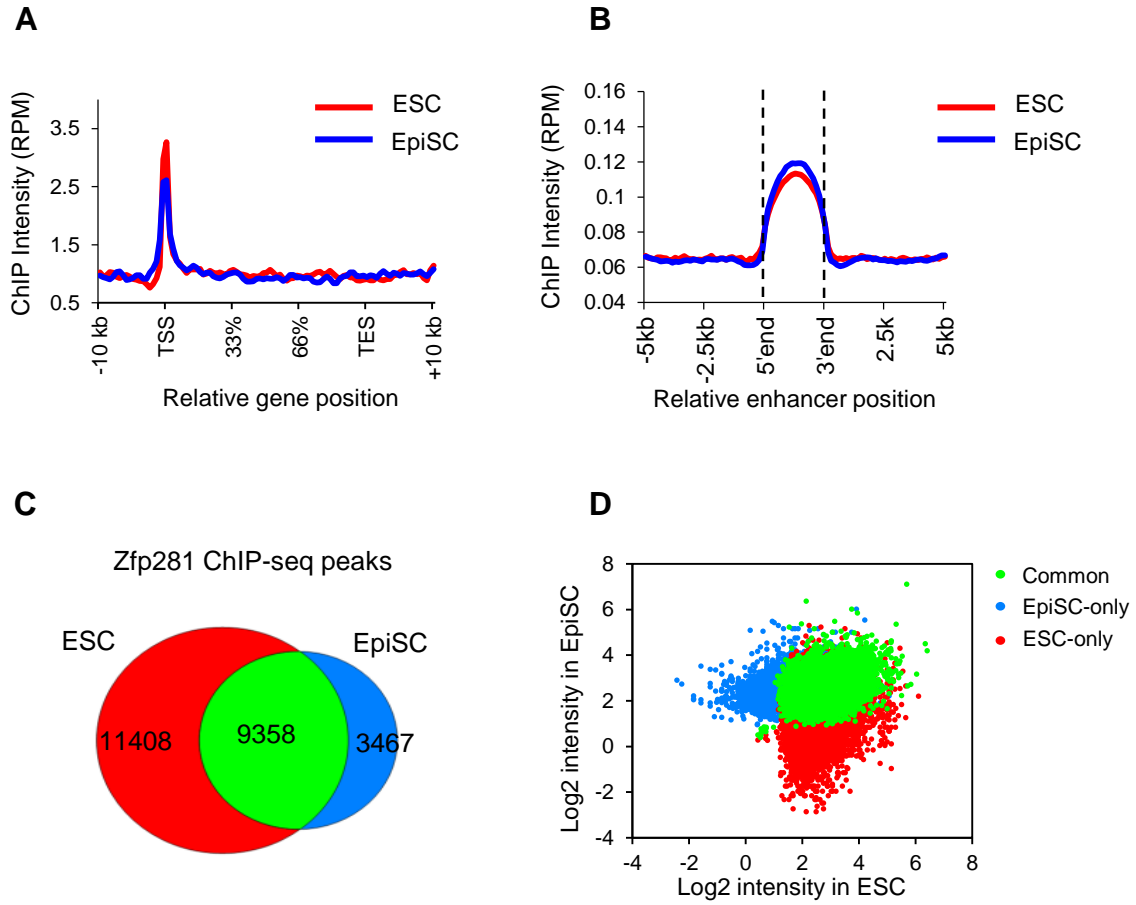

Figure 5-figure supplement 2

Supplement: supp [file elife-33333-supp-v1.zip]

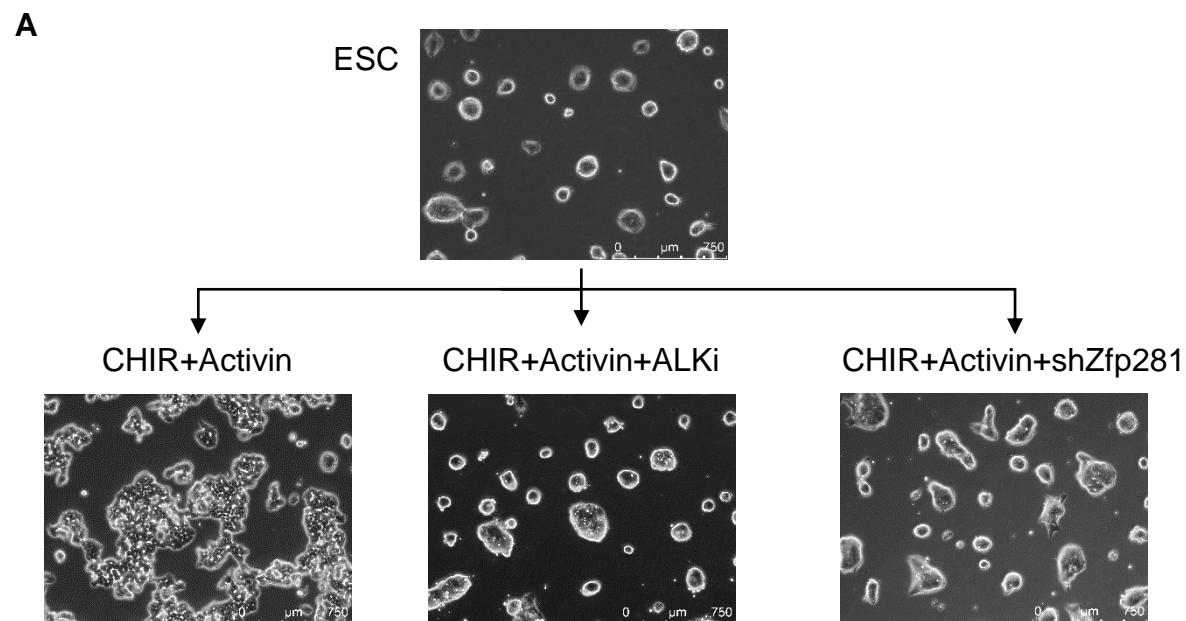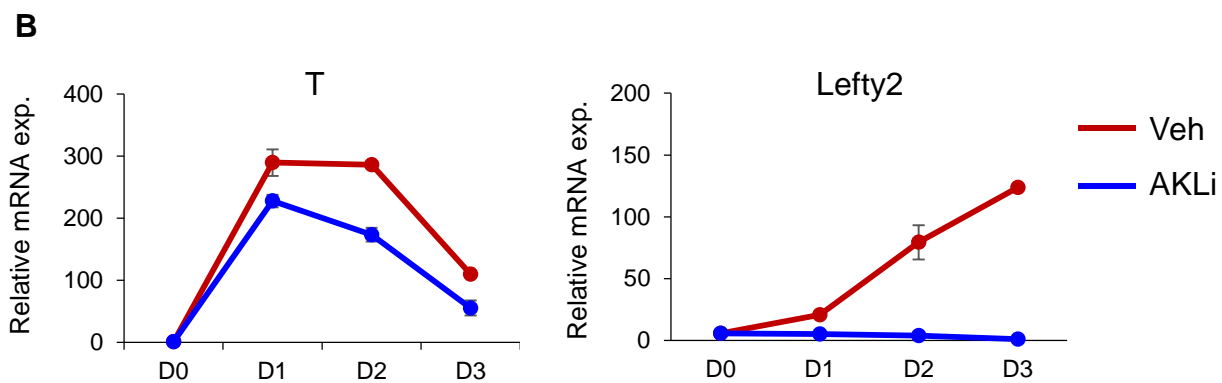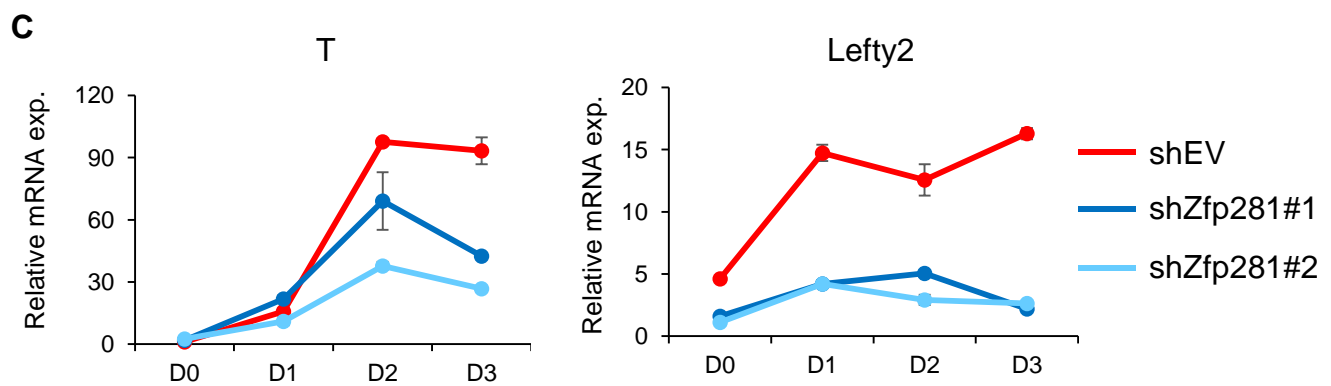

Figure 7-figure supplement 2

Supplement: supp [file elife-33333-supp-v1.zip]

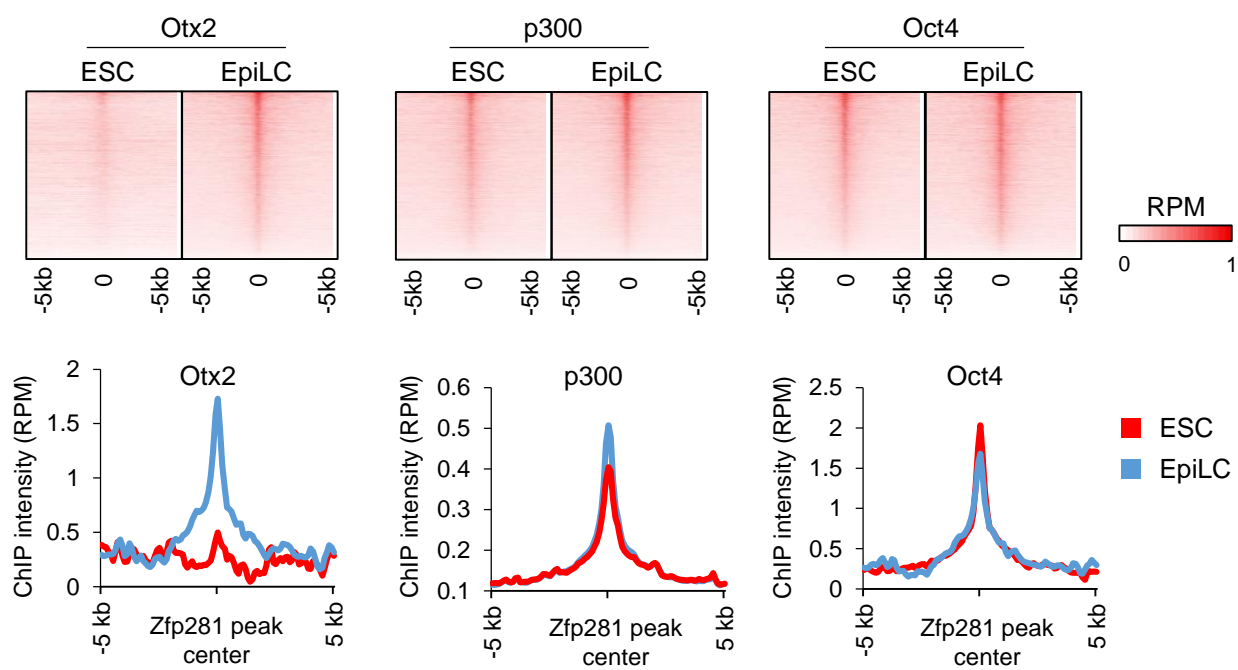

Figure 7-figure supplement 3

Supplement: supp [file elife-33333-supp-v1.zip › elife_poa_e33333_Figure_7_figure_supplement_3.pdf]

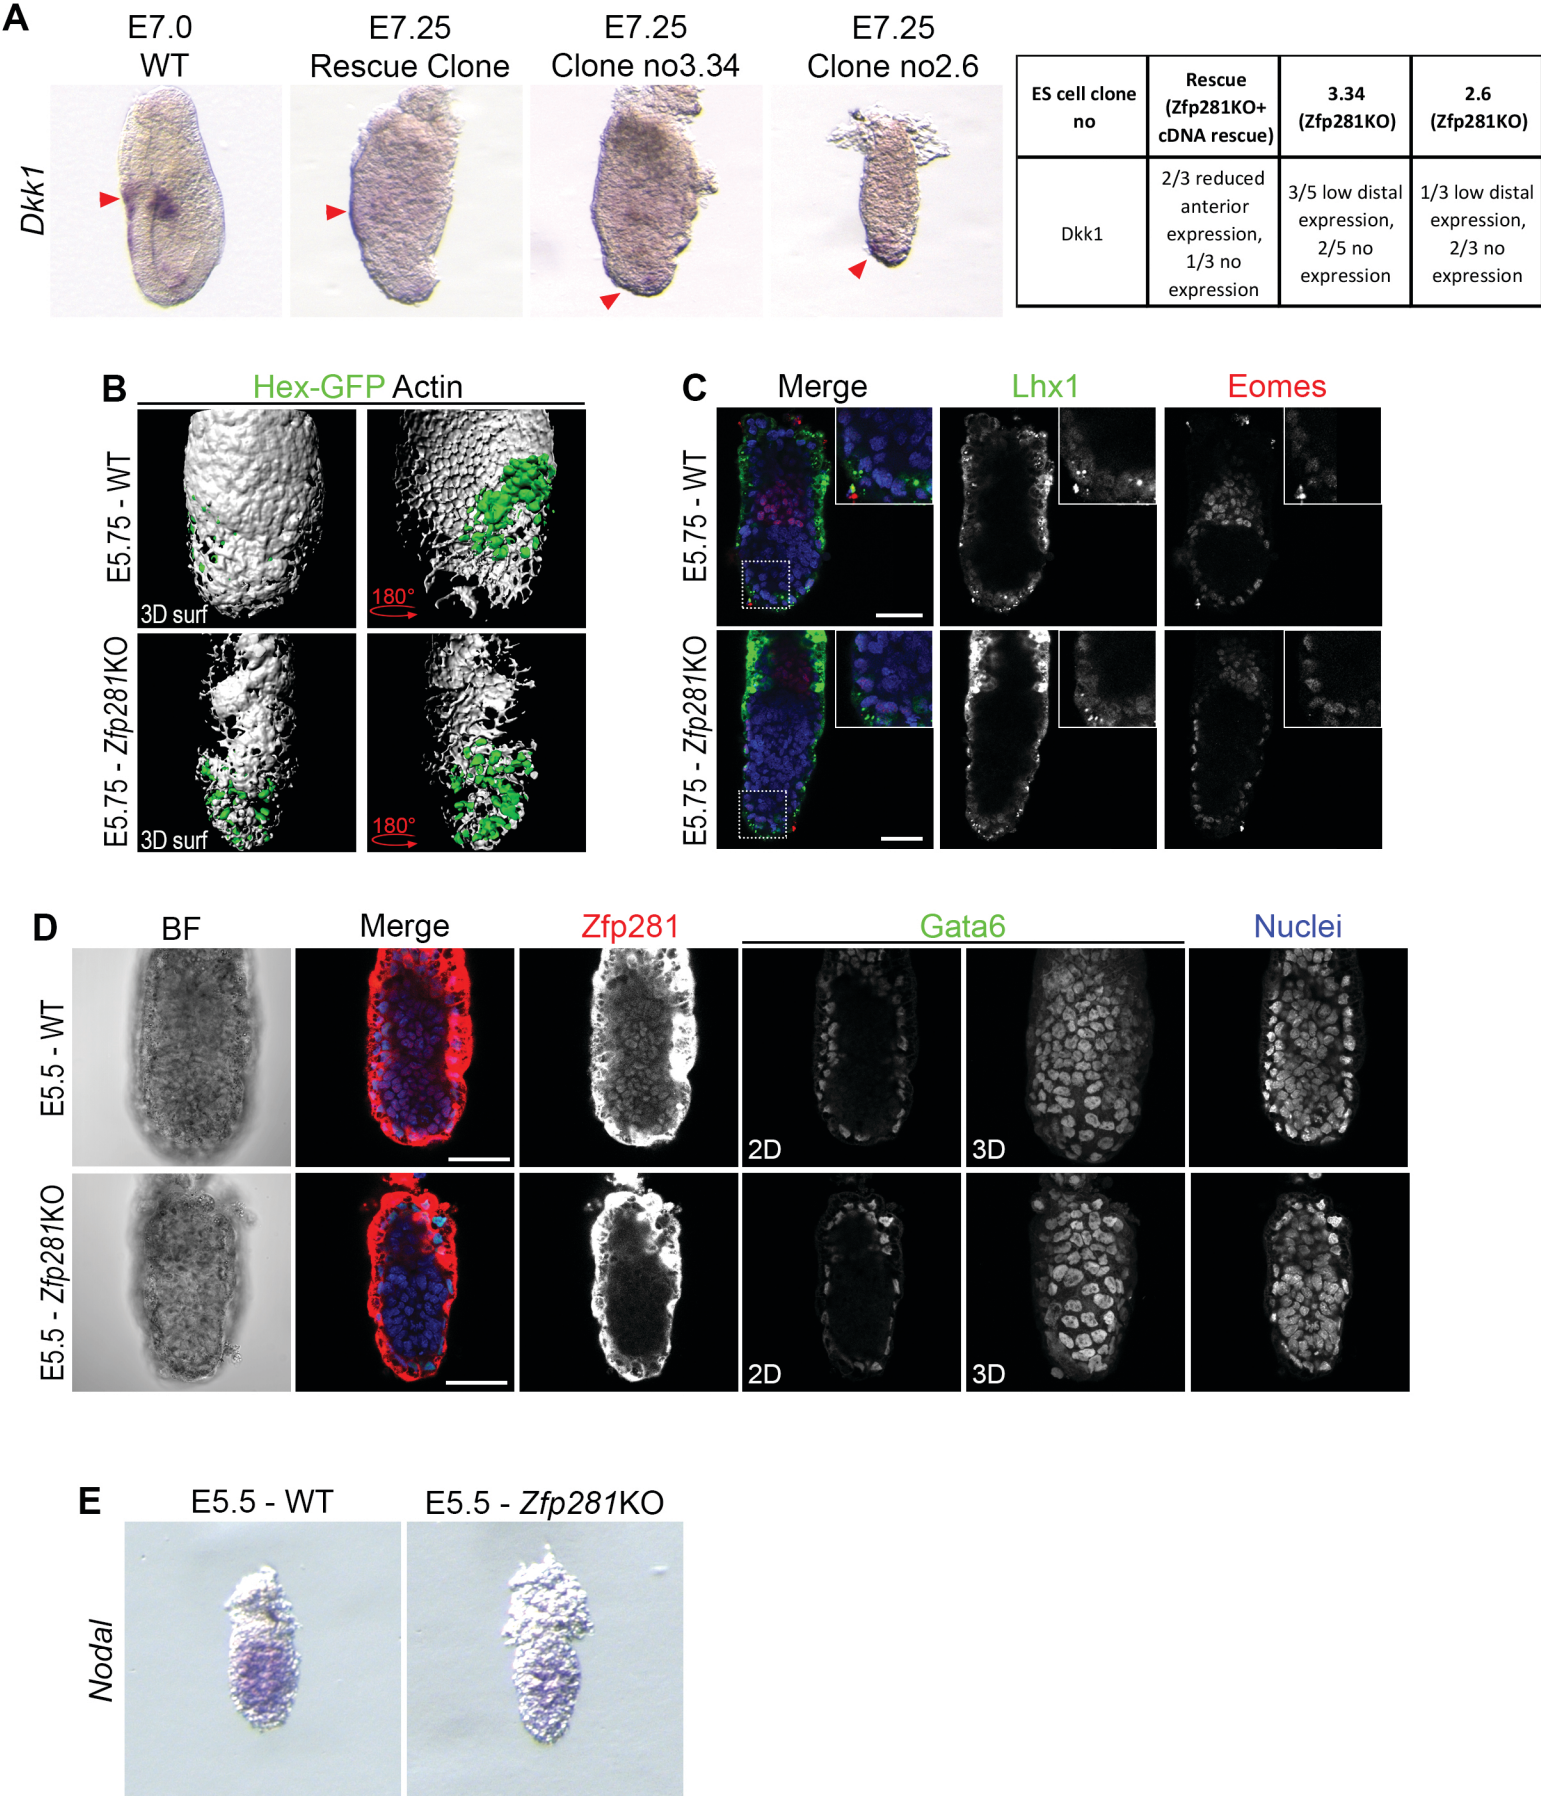

Figure 4-figure supplement 2

Supplement: supp [file elife-33333-supp-v1.zip › elife_poa_e33333_Figure_4_figure_supplement_2.pdf]

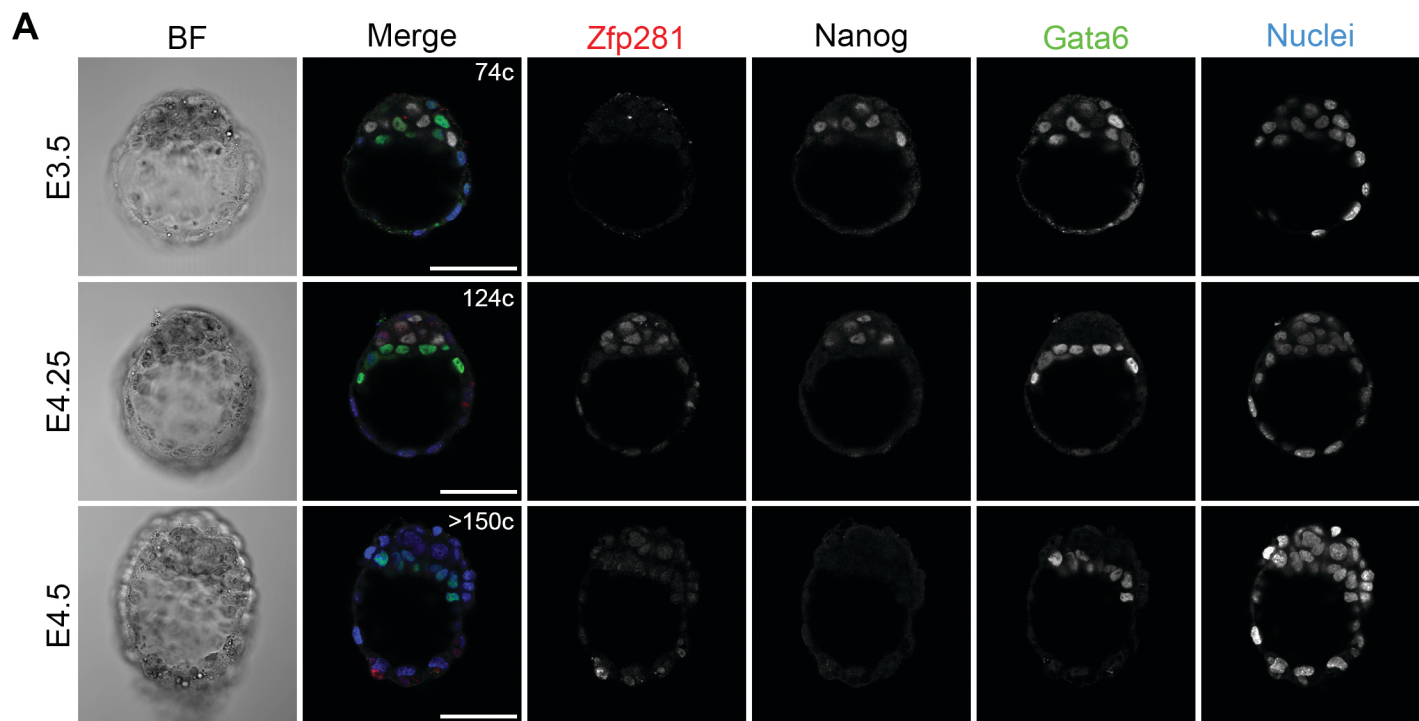

**B** Single cell microarray, data from Ohnishi et al., 2014

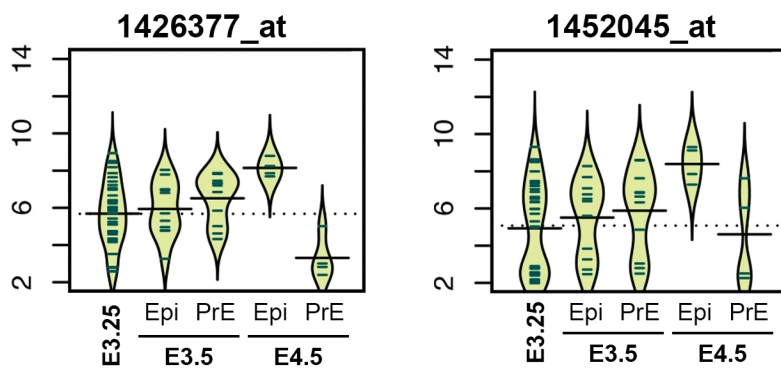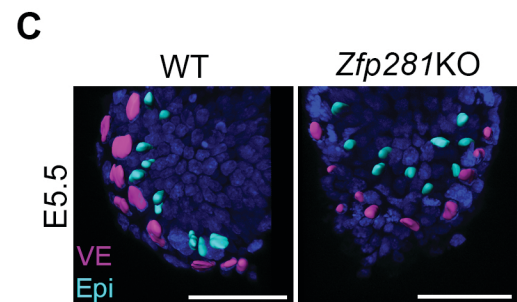

Figure 1-figure supplement 1

Supplement: supp [file elife-33333-supp-v1.zip › elife_poa_e33333_Figure_1_figure_supplement_1.pdf]

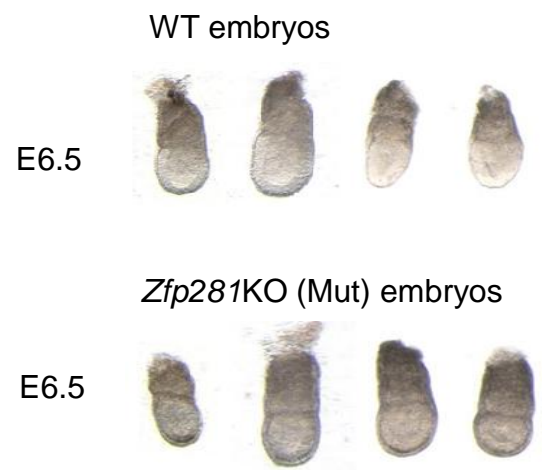

Supplement: supp [file elife-33333-supp-v1.zip › elife_poa_e33333_Figure_2_figure_supplement_1.pdf]

**A** Tetraploid *Zfp281*KO chimera

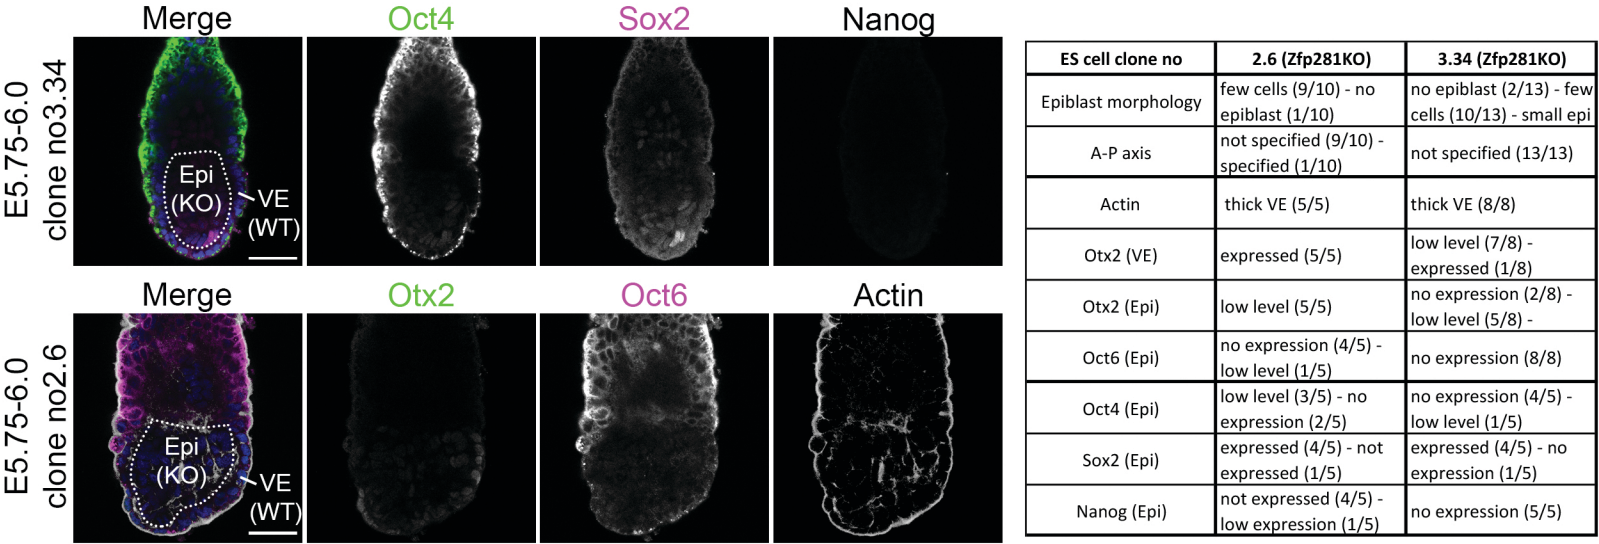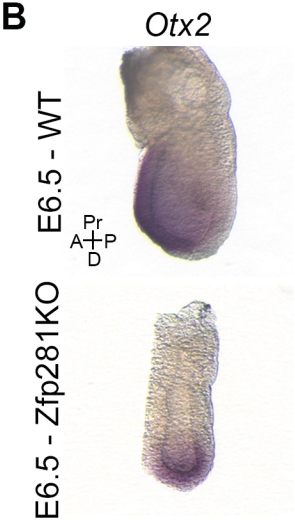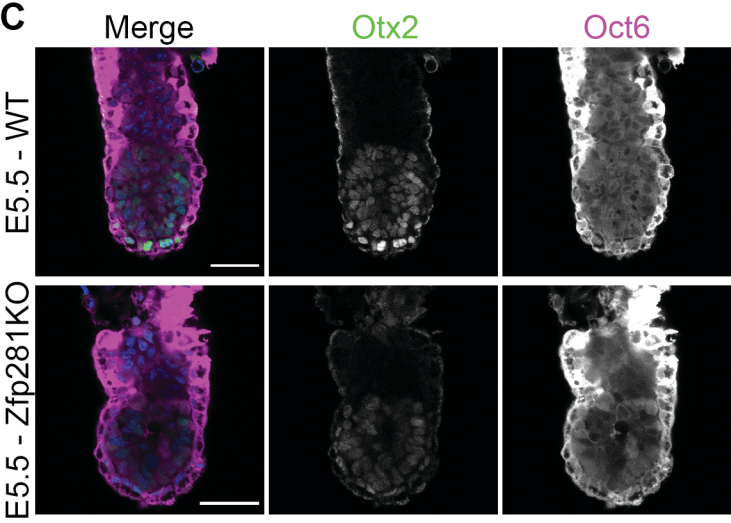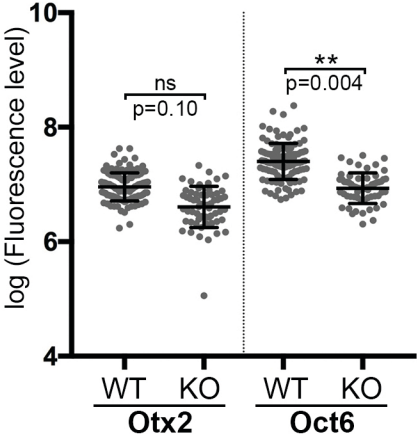

Figure 3-figure supplement 2

Supplement: supp [file elife-33333-supp-v1.zip › elife_poa_e33333_Figure_3_figure_supplement_2.pdf]

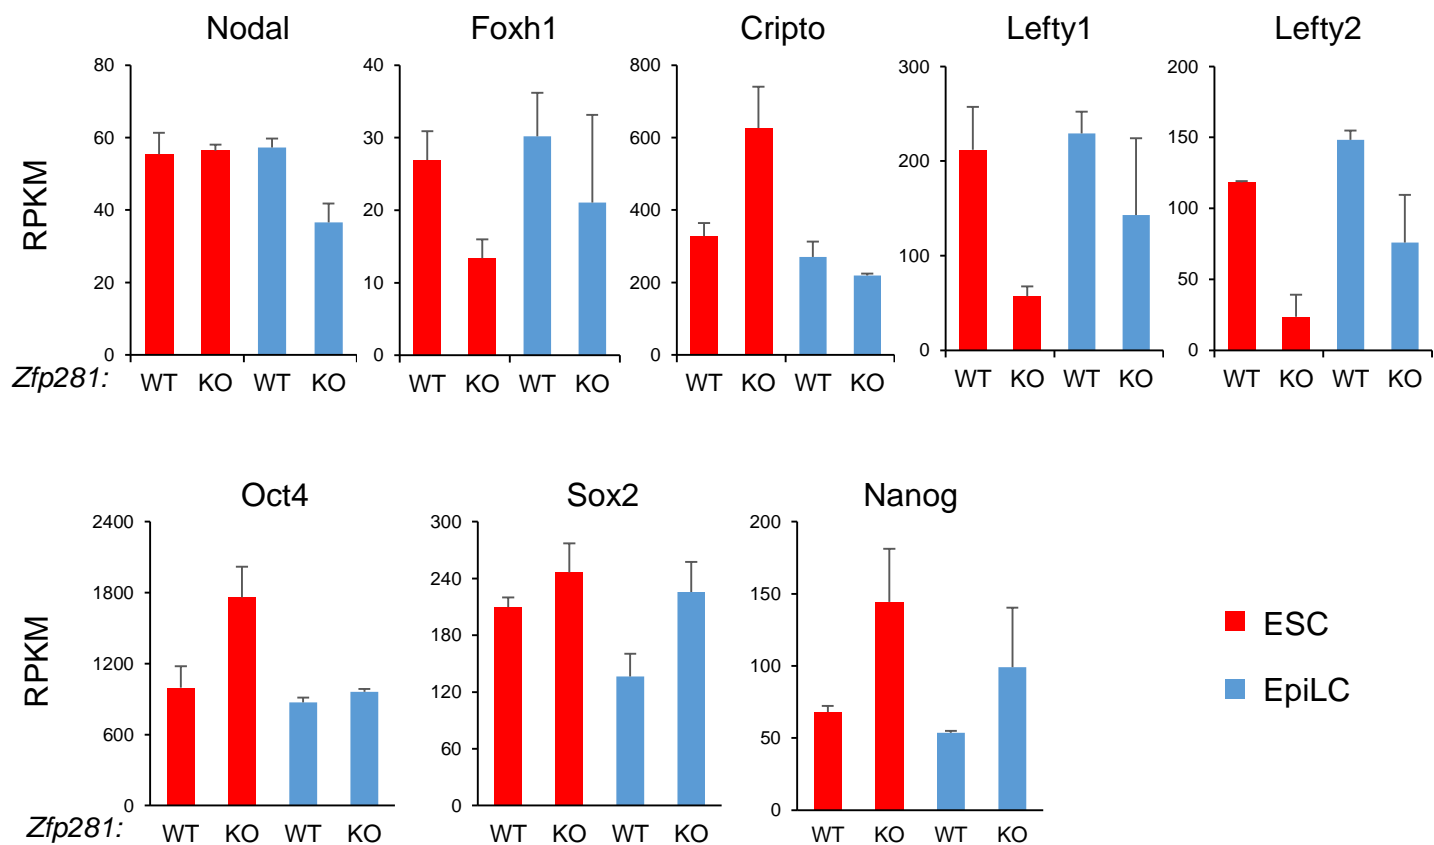

Figure 5-figure supplement 1

Supplement: supp [file elife-33333-supp-v1.zip › elife_poa_e33333_Figure_5_figure_supplement_1.pdf]

**A**EpiSC: shEV shZfp281#1 shZfp281#2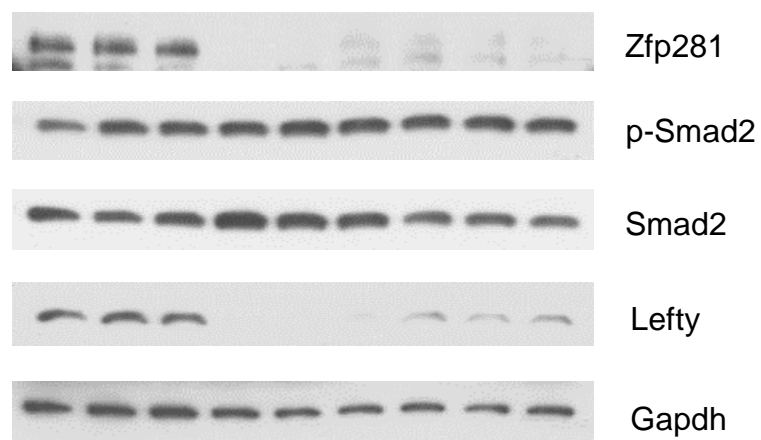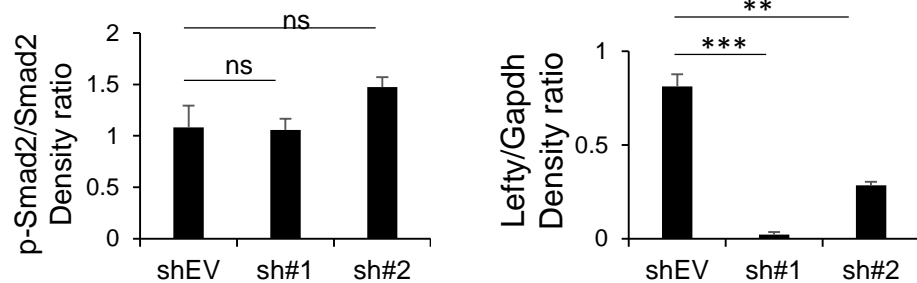**B**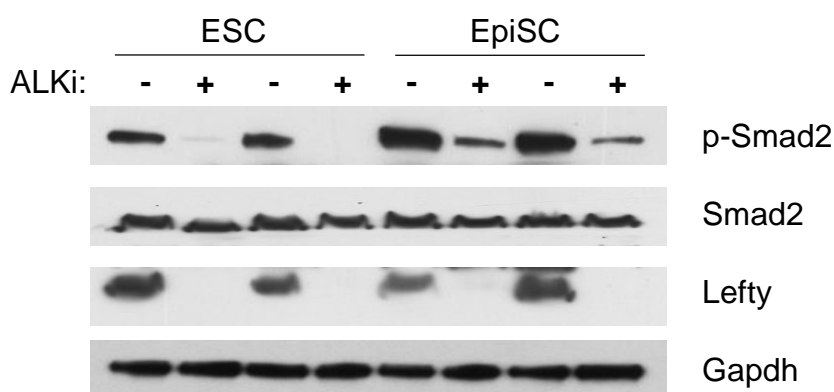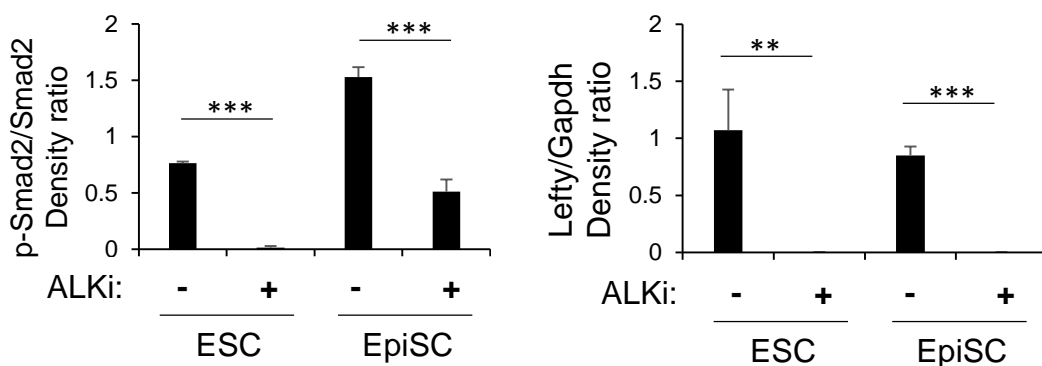**Figure 7-figure supplement 1**

Supplement: supp [file elife-33333-supp-v1.zip › elife_poa_e33333_Figure_7_figure_supplement_1.pdf]

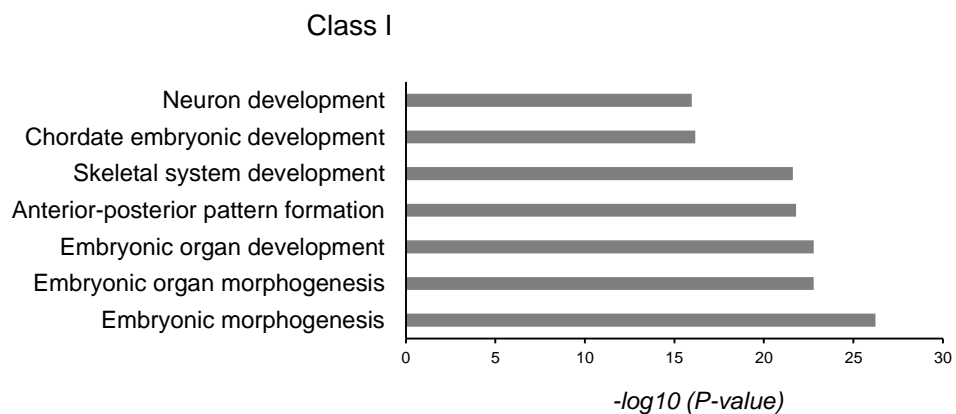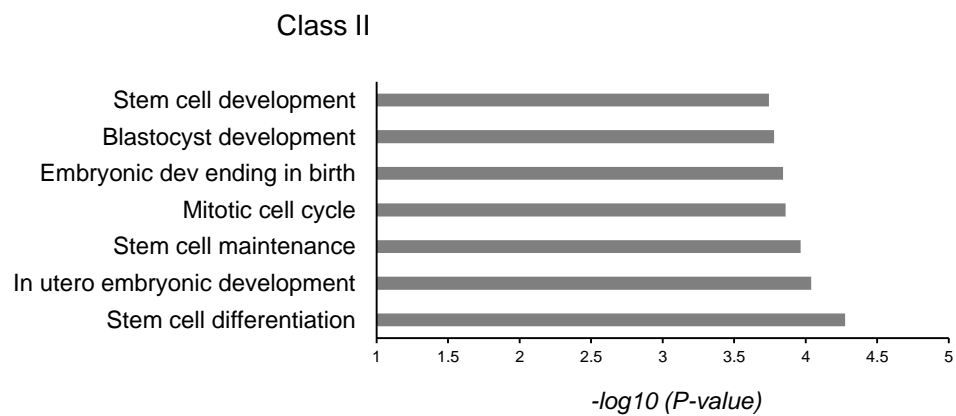

**Figure 6-figure supplement 1**

Supplement: supp [file elife-33333-supp-v1.zip › elife_poa_e33333_Figure_6_figure_supplement_1.pdf]

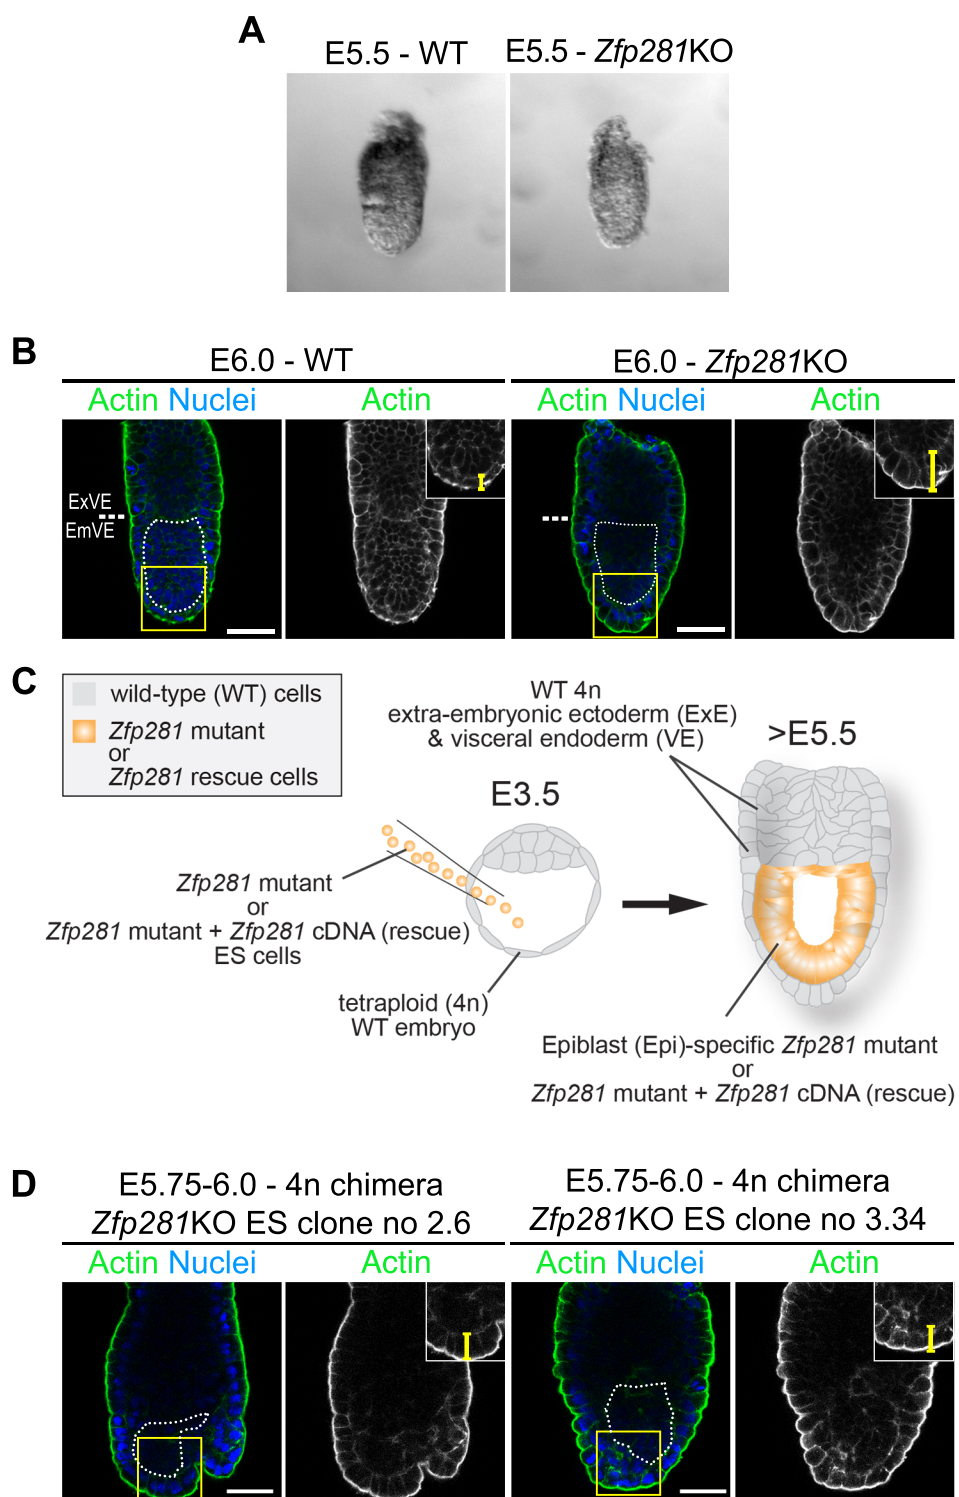

Figure 1-figure supplement 3

Supplement: supp [file elife-33333-supp-v1.zip › elife_poa_e33333_Figure_1_figure_supplement_3.pdf]
